# Supplementary material for: Catalytic and highly regenerable aminic organoselenium antioxidants with cytoprotective effects
Source: Royal Society of Chemistry journal article supplement (doi:10.1039/d0ob02368j), 2021-01-01

**Supporting Information**  
**for**  
**Catalytic and Highly Regenerable Aminic Organoselenium Antioxidants**  
**with Cytoprotective Effects**

Manish Kumar,<sup>a</sup> Babli Chhillar,<sup>a</sup> Manisha Yadav,<sup>a</sup> Poonam Sagar,<sup>b</sup> Nitin K. Singhal,<sup>b</sup> Paul J. Gates,<sup>c</sup> Ray J. Butcher,<sup>d</sup> and Vijay P. Singh\*<sup>a</sup>

<sup>a</sup>Department of Chemistry & Centre of Advanced Studies in Chemistry, Panjab University, Sector-14, Chandigarh – 160 014, India

<sup>b</sup>Department of Biotechnology, National Agri-Food Biotechnology Institute, C-127, I Floor, Phase-VIII, Industrial Area, SAS Nagar, Mohali 160071, Punjab, India

<sup>c</sup>University of Bristol, School of Chemistry, Bristol, BS8 1TS, United Kingdom

<sup>d</sup>Department of Chemistry, Howard University, Washington D.C. 20059, United States

\*Corresponding author: [vijay@pu.ac.in](mailto:vijay@pu.ac.in)

---Table of Contents---

|           |                                                                                                              |
|-----------|--------------------------------------------------------------------------------------------------------------|
| p S3-S30  | $^1\text{H}$ , $^{13}\text{C}$ , $^{77}\text{Se}$ NMR and HRMS spectra for compounds prepared                |
| p S31-S36 | The $^{77}\text{Se}$ NMR spectra for the mechanistic studies of compound <b>6a</b>                           |
| p S37     | <b>Scheme S1.</b> Proposed mechanism for the formation of <b>6a</b>                                          |
| p S38-S41 | CheckCIF/PLATON report for compound <b>6c</b>                                                                |
| p S42-S57 | Crystal data and structure refinement for compound <b>6c</b>                                                 |
| p S58-S61 | <b>Table S1-S4.</b> Optimized geometries, Sum of electronic and thermal Enthalpies and Cartesian coordinates |
| p S62     | <b>Table S5.</b> Data obtained by DFT calculations and bond dissociation enthalpies                          |
| p S63     | <b>Figure S35.</b> Relative cell viability of C6 cells                                                       |

Figure S1. <sup>1</sup>H NMR spectrum of 5a

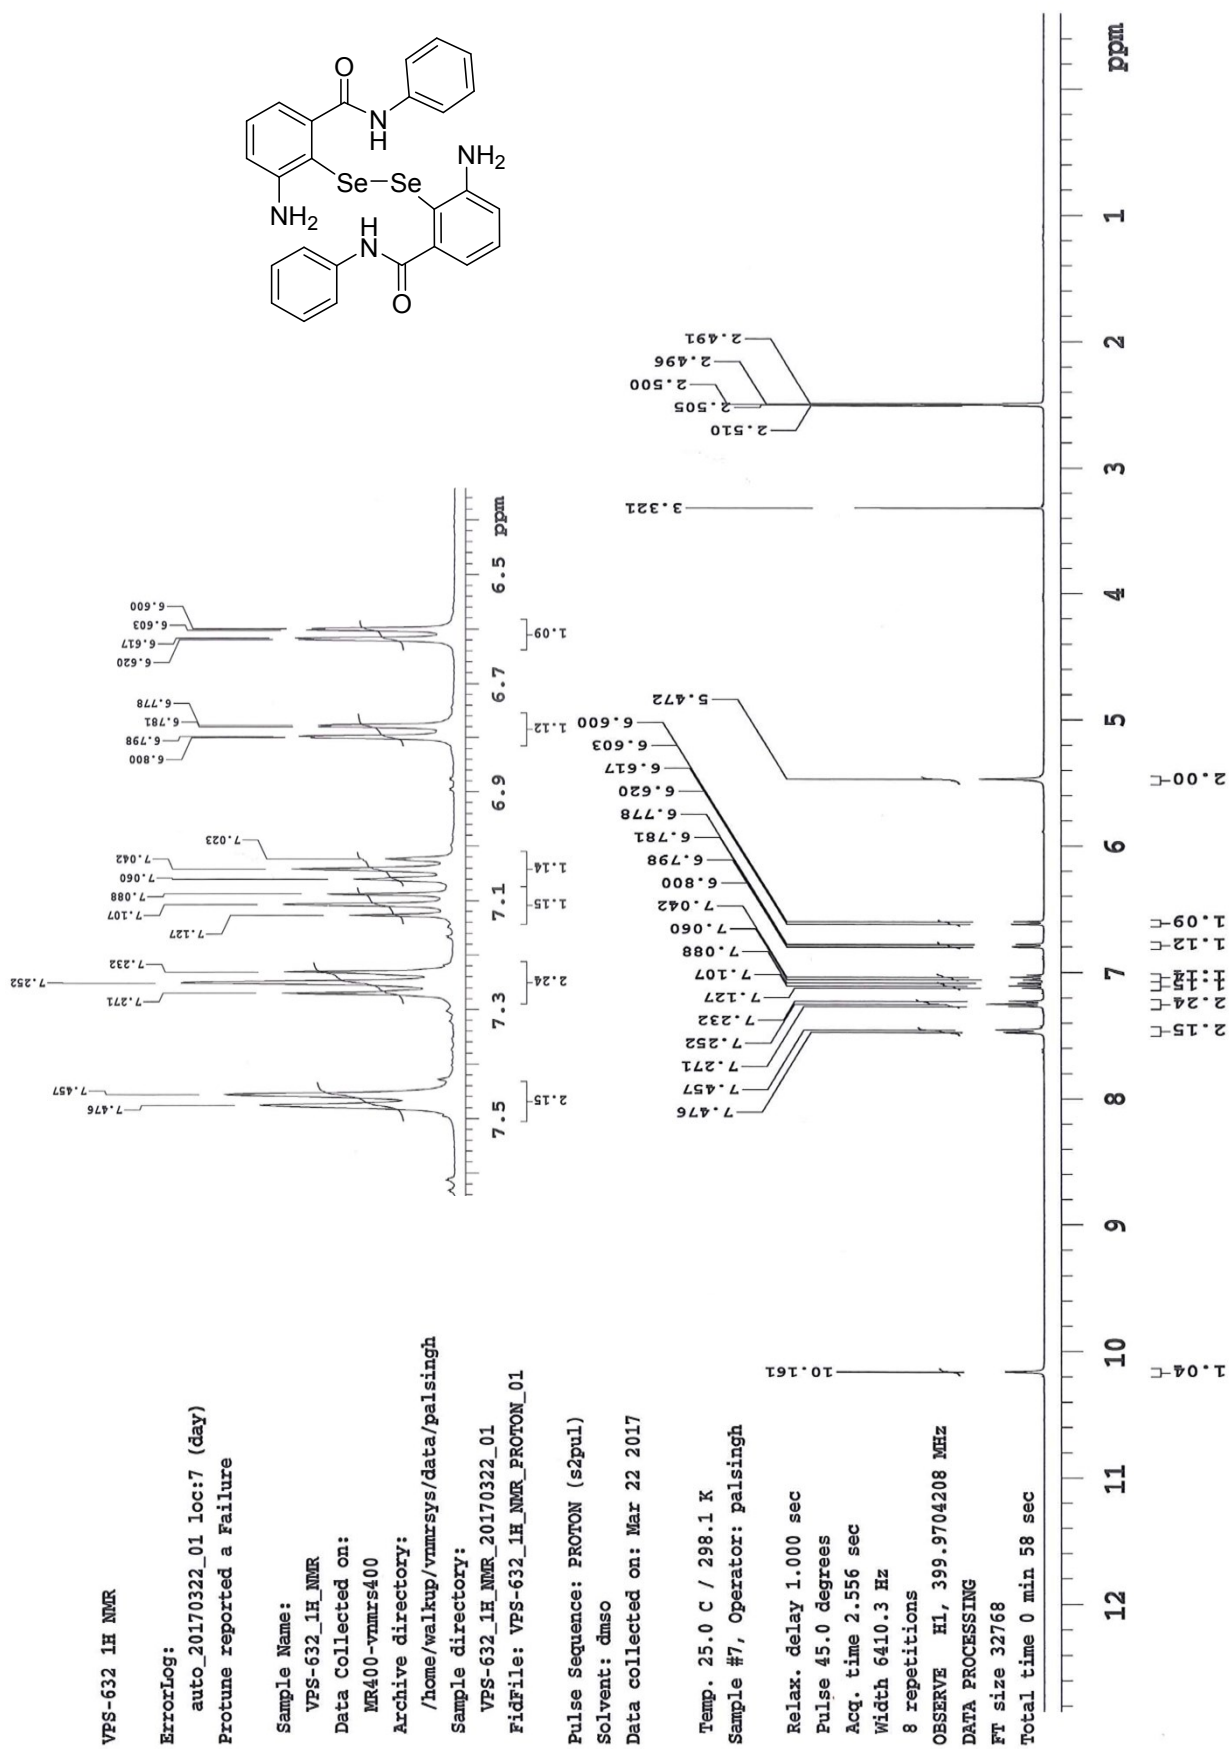

Figure S2. <sup>13</sup>C NMR spectrum of 5a

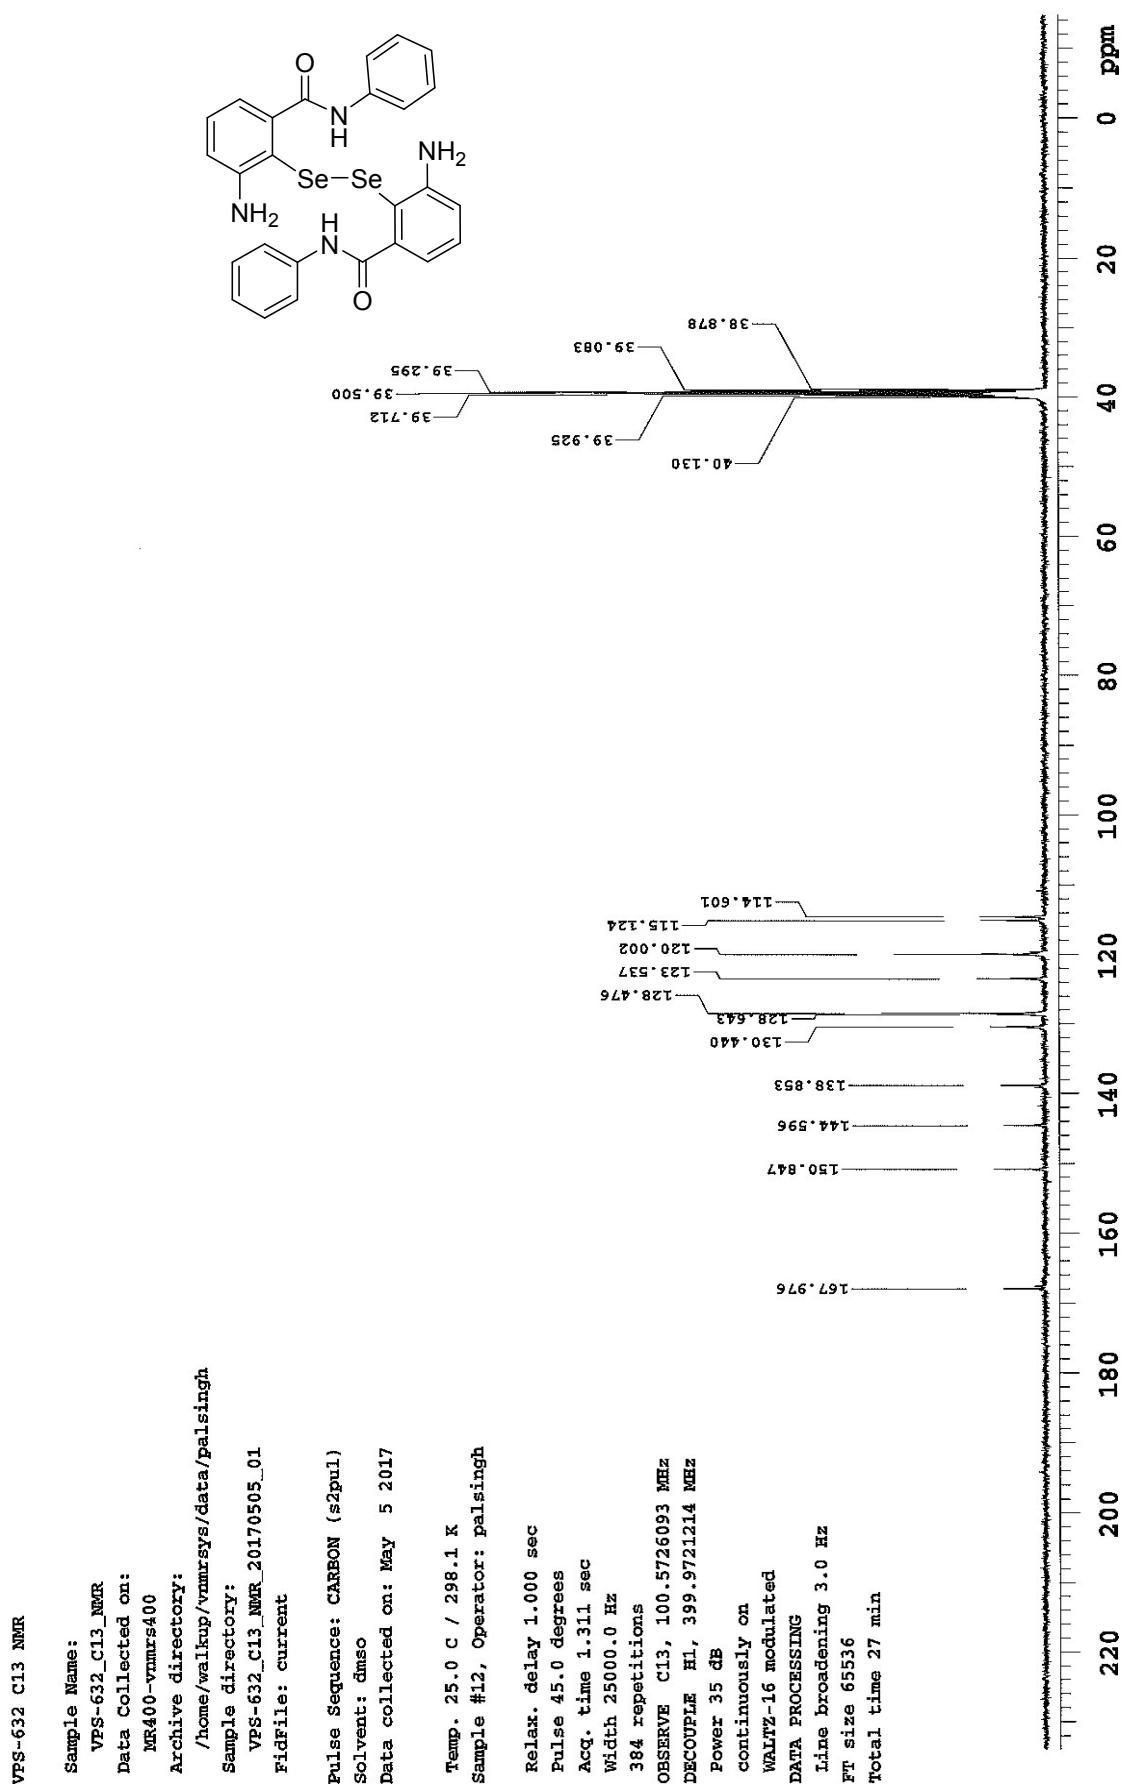

Figure S3.  $^{77}\text{Se}$  NMR spectrum of **5a**

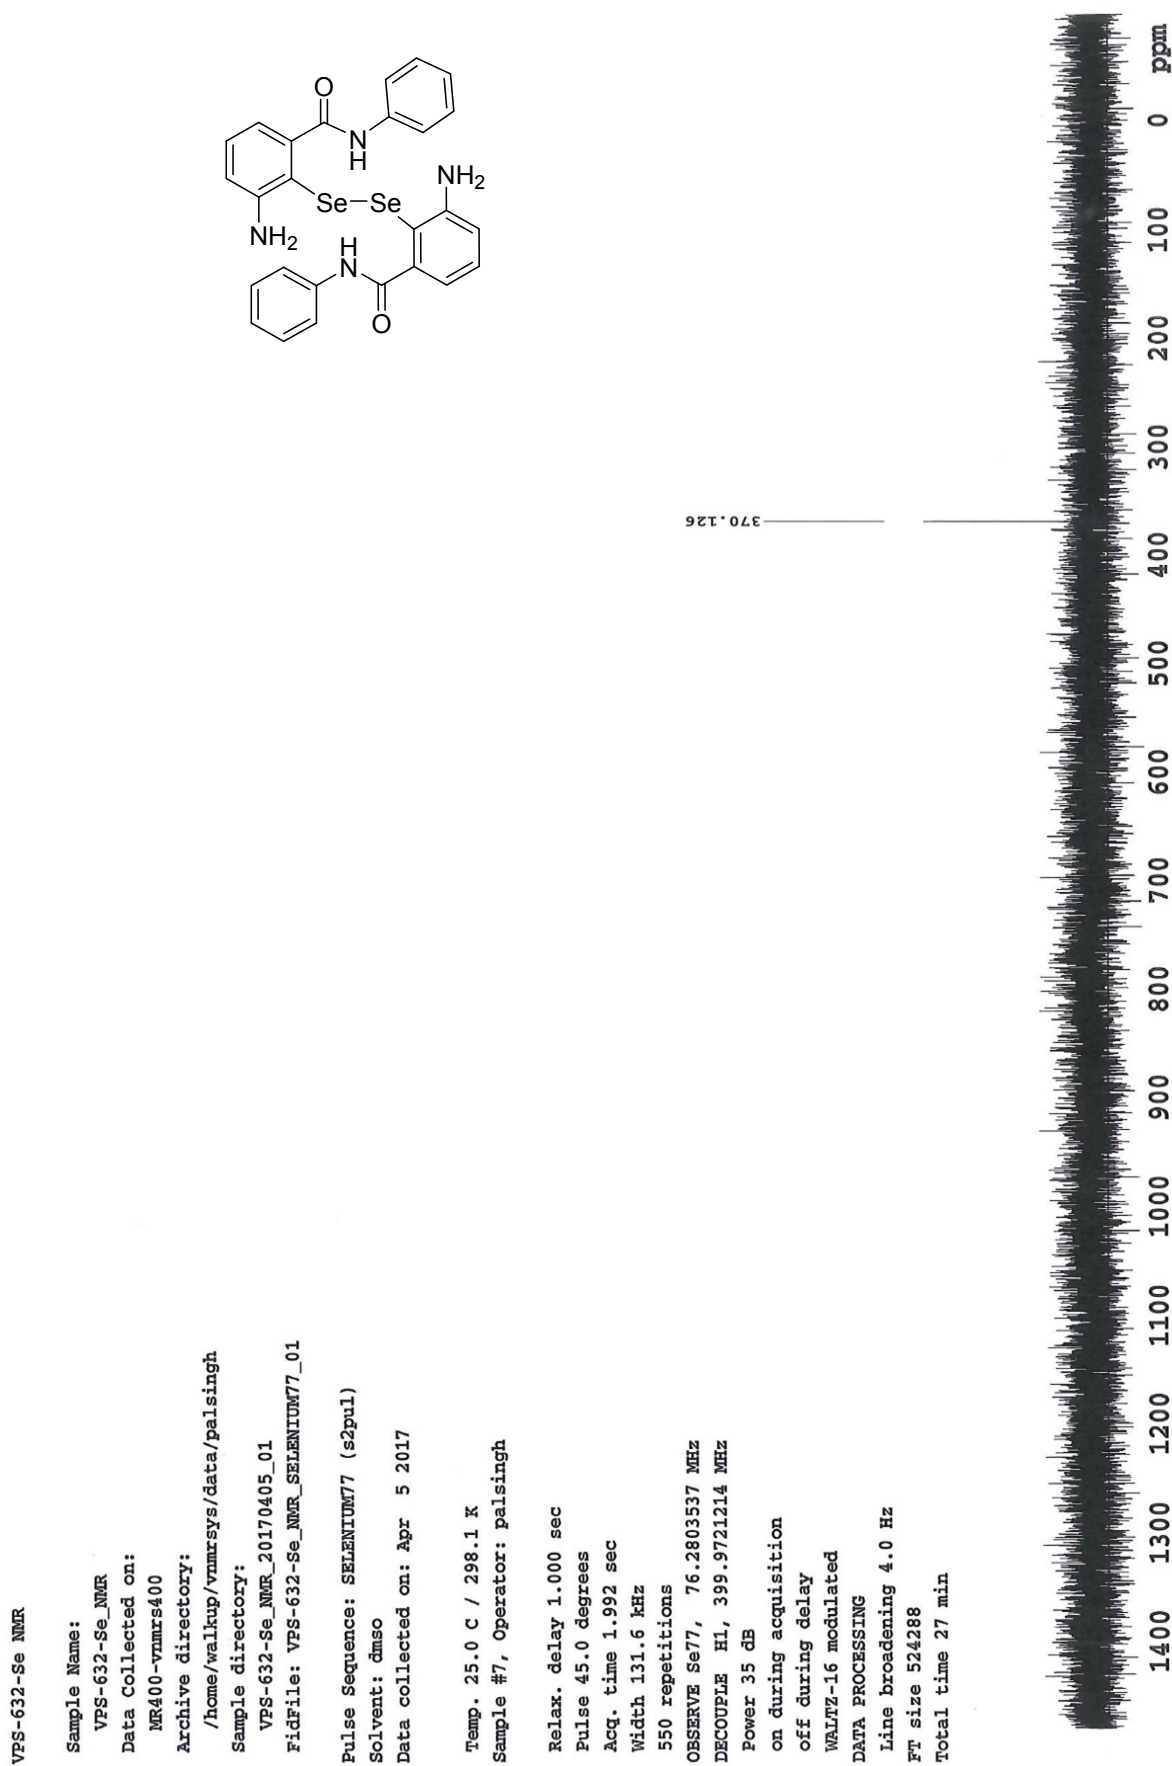

Figure S4. HRMS of 5a

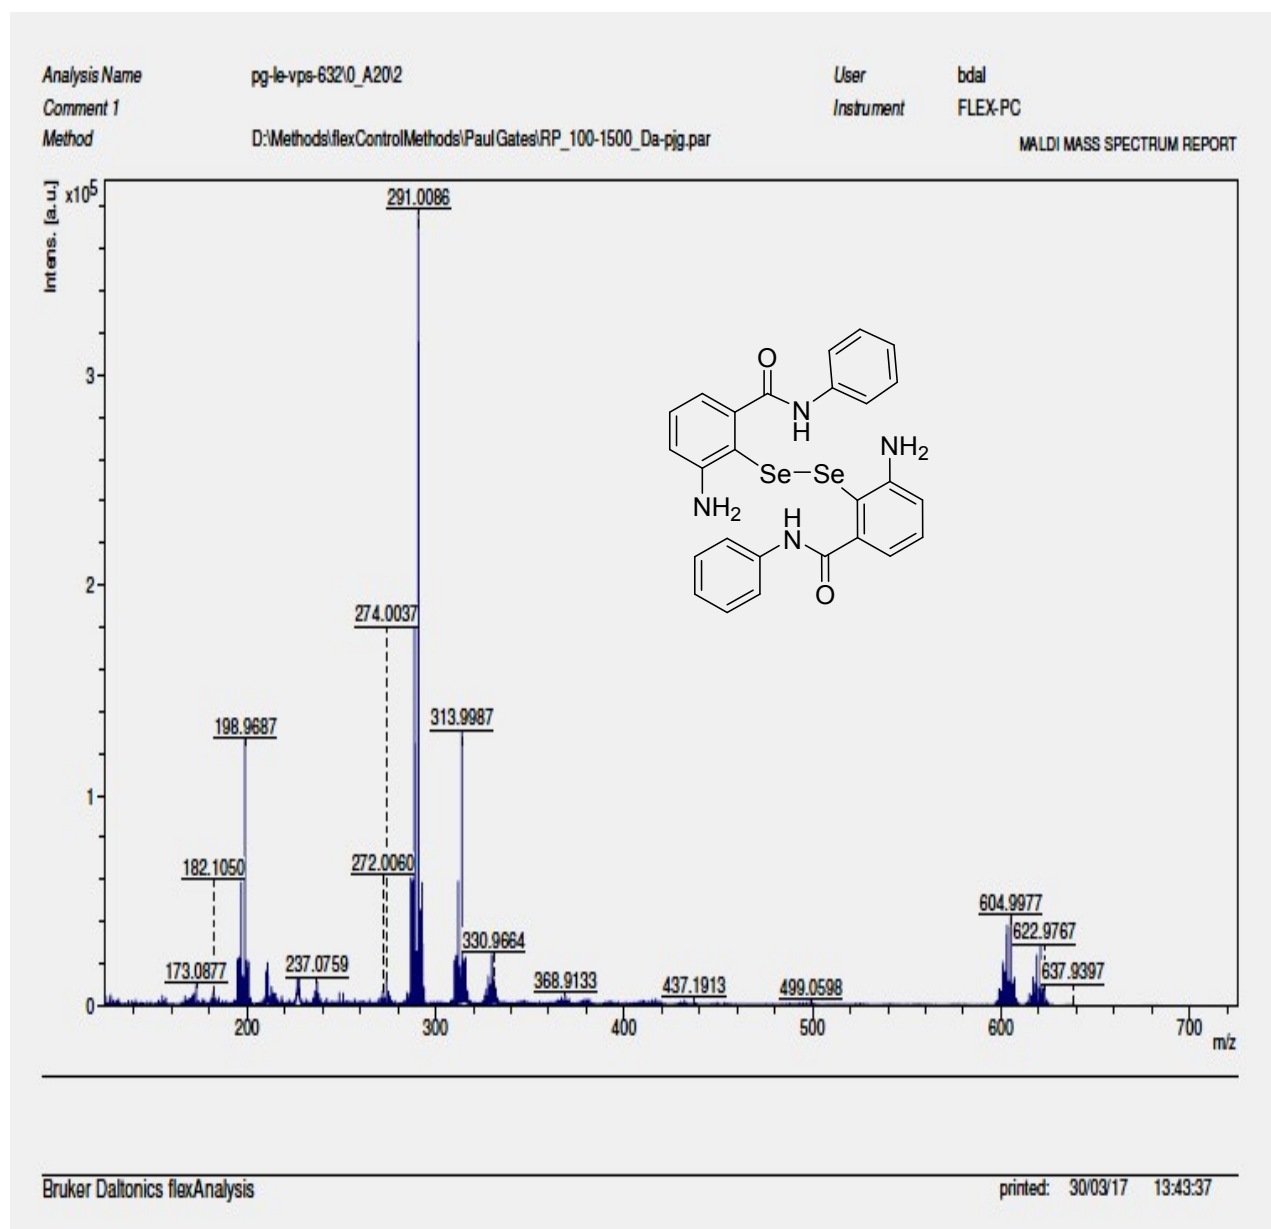

**Figure S5.** Expansion of the HRMS of **5a**

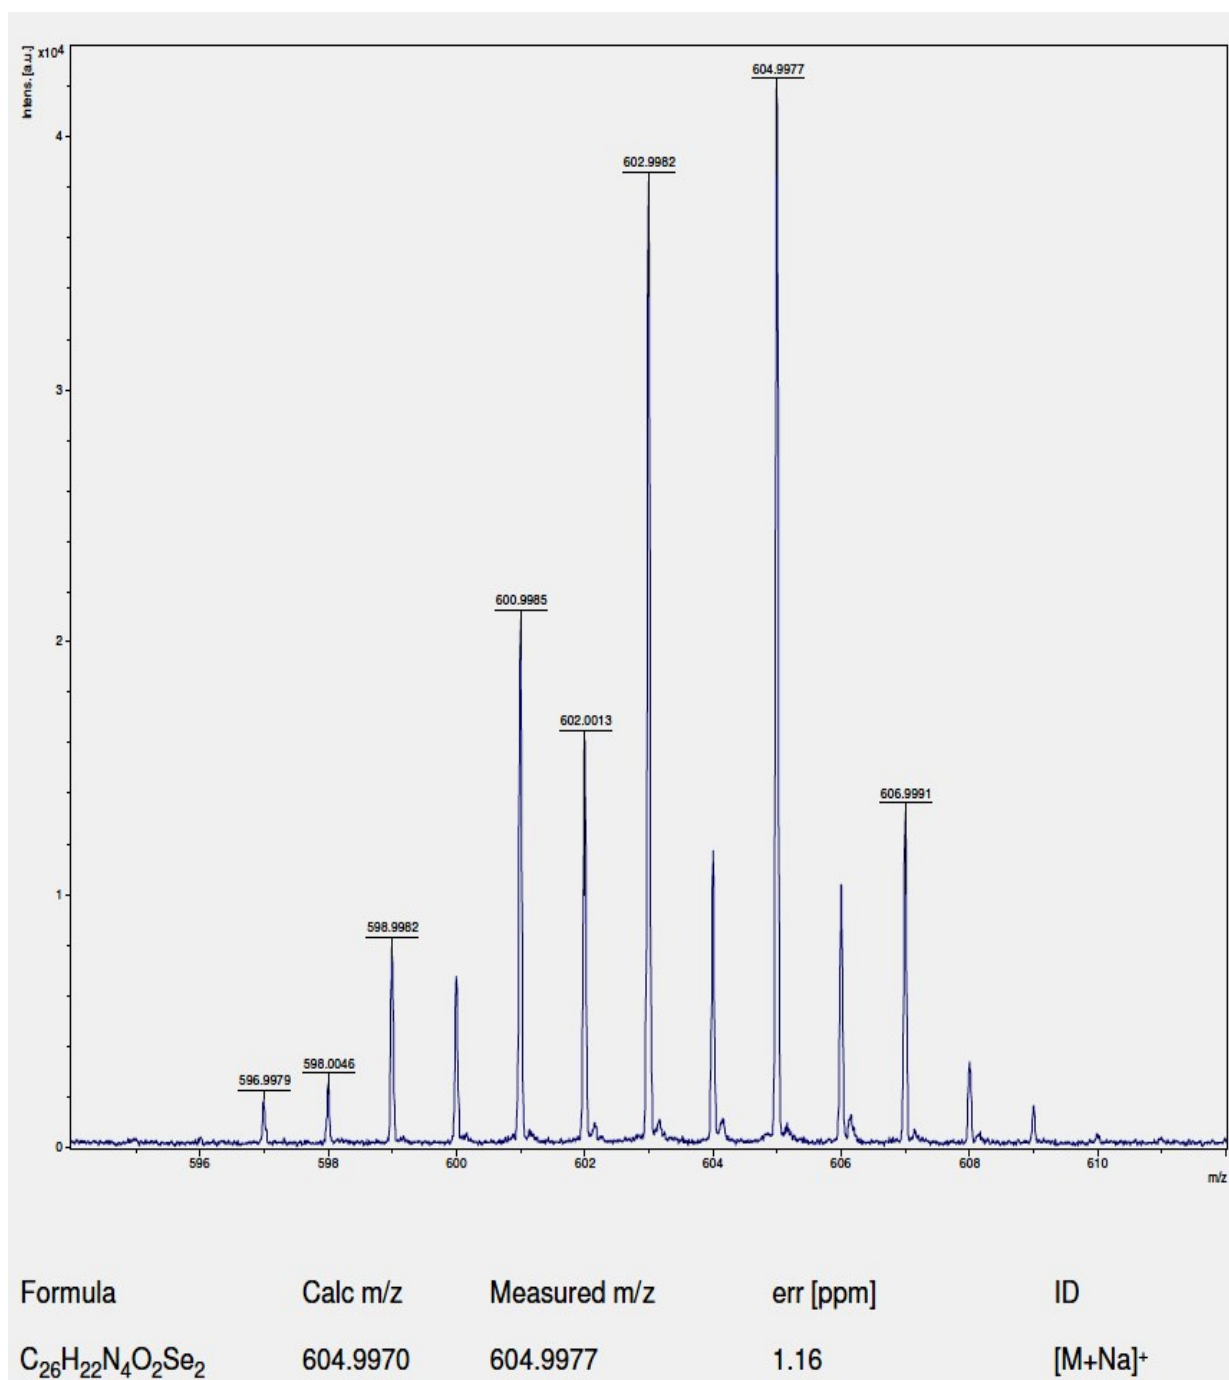

Figure S6. <sup>1</sup>H NMR spectrum of 5c

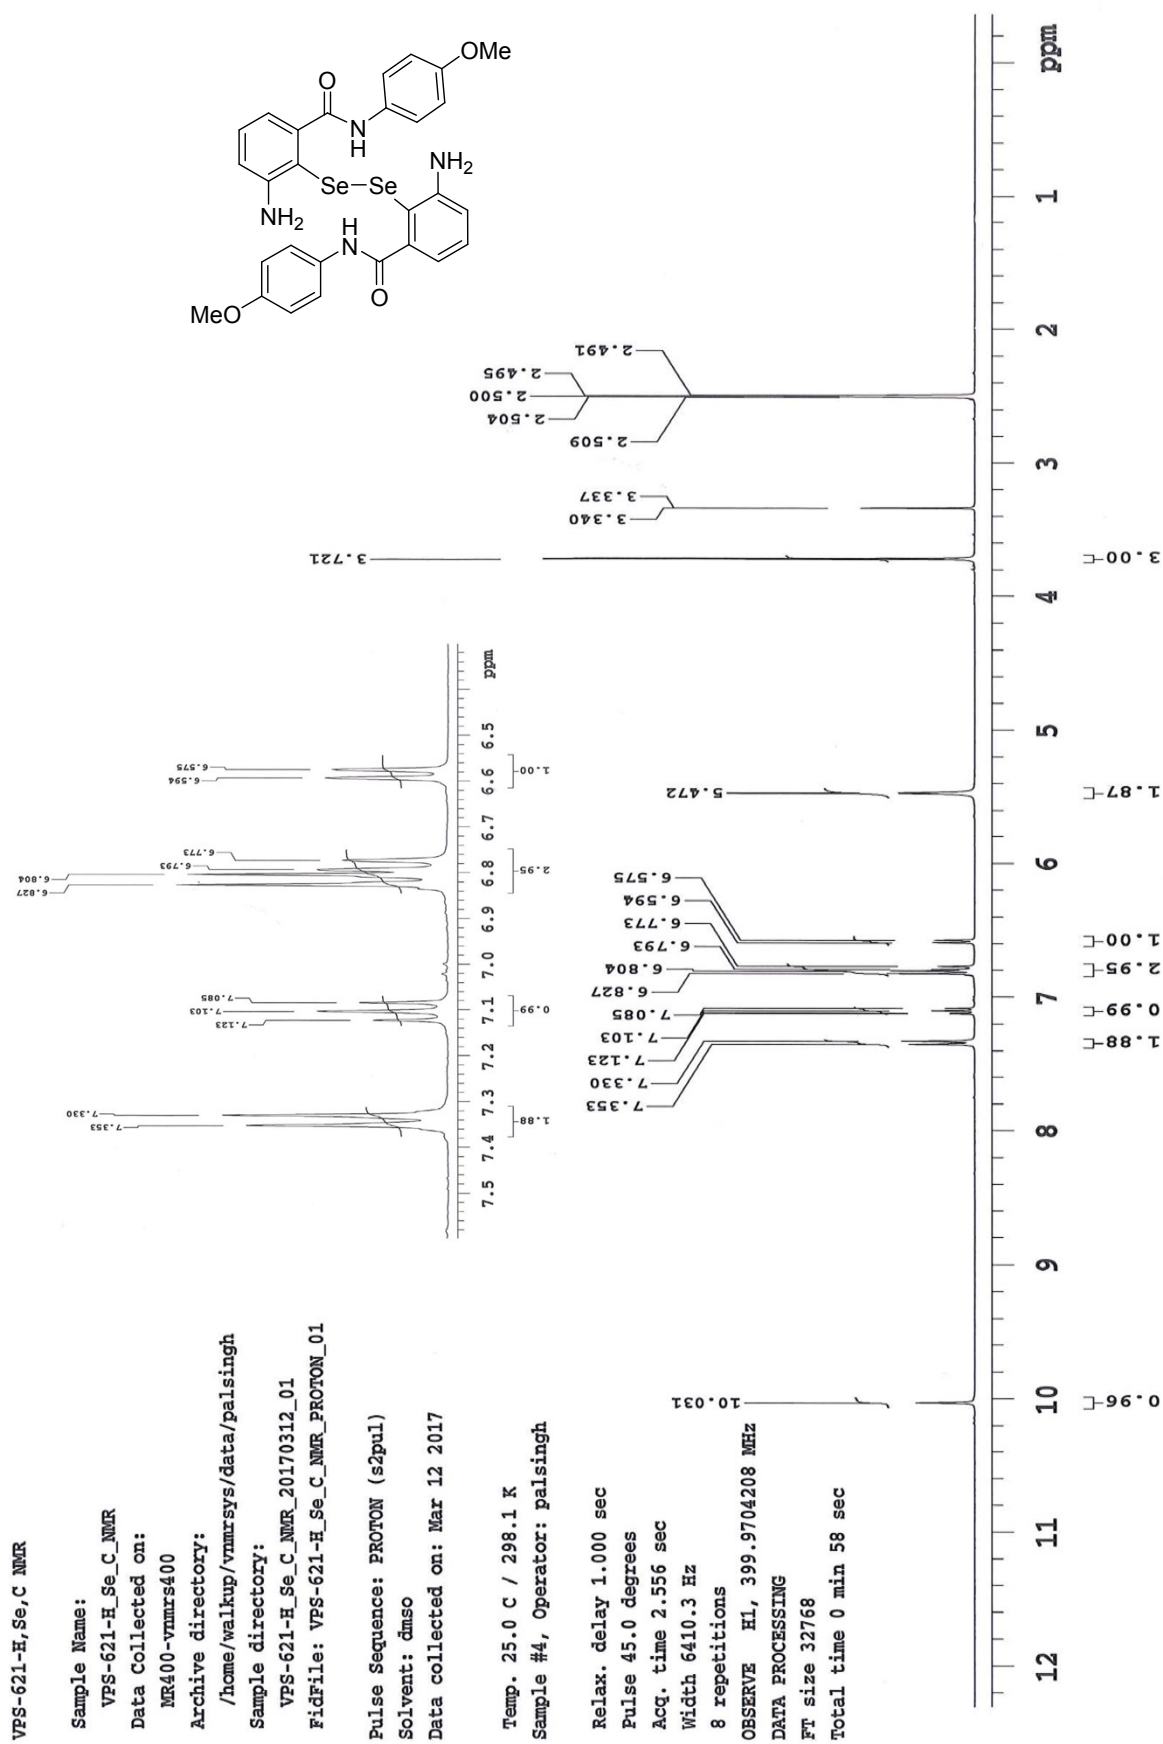



Figure S7. <sup>13</sup>C NMR spectrum of **5c**

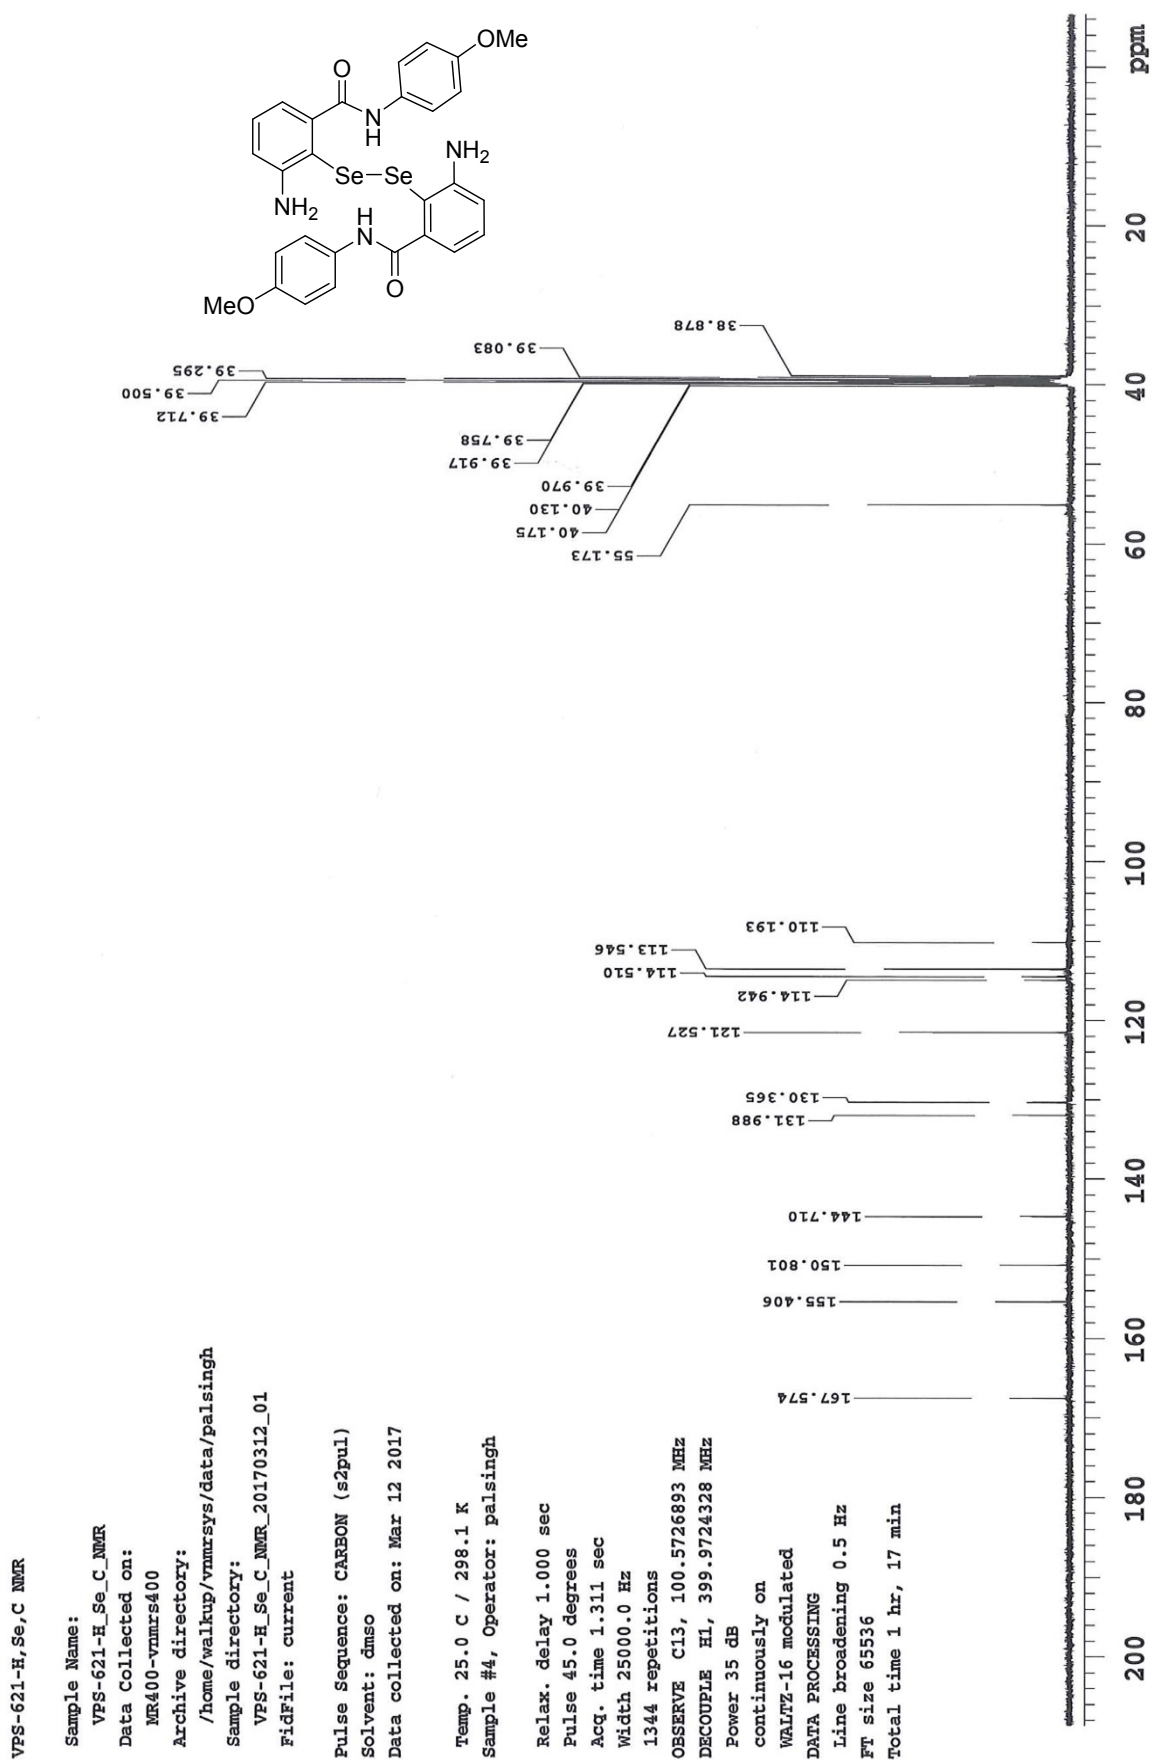

Figure S8. <sup>77</sup>Se NMR spectrum of 5c

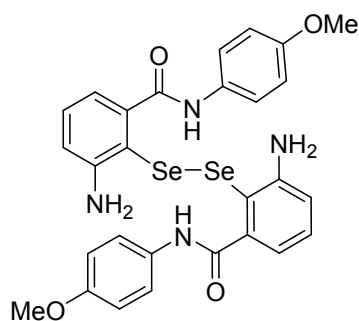

VPS-621-H, Se, C NMR

Sample Name:

VPS-621-H\_Se\_C\_NMR

Data Collected on:

MR400-vmrs400

Archive directory:

/home/walkup/vnmrsys/data/palsingh

Sample directory:

VPS-621-H\_Se\_C\_NMR\_20170312\_01

FidFile: current

Pulse Sequence: SELENIUM77 (s2pu1)

Solvent: dms0

Data collected on: Mar 12 2017

Temp. 25.0 C / 298.1 K

Sample #4, Operator: palsingh

Relax. delay 1.000 sec

Pulse 45.0 degrees

Acq. time 1.992 sec

Width 131.6 kHz

936 repetitions

OBSERVE Se77, 76.2804131 MHz

DECOUPLE H1, 399.9724328 MHz

Power 35 dB

on during acquisition

off during delay

WALTZ-16 modulated

DATA PROCESSING

Line broadening 6.0 Hz

FT size 524288

Total time 49 min

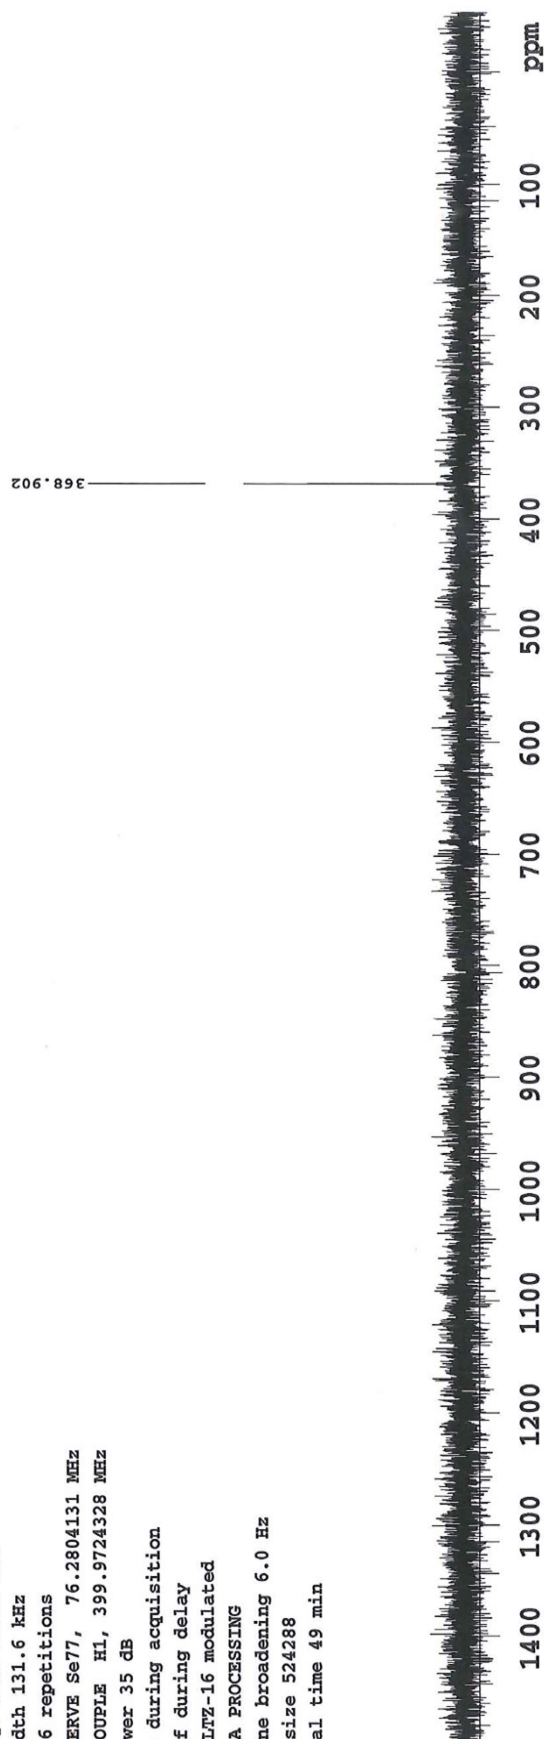

Figure S9. HRMS of 5c

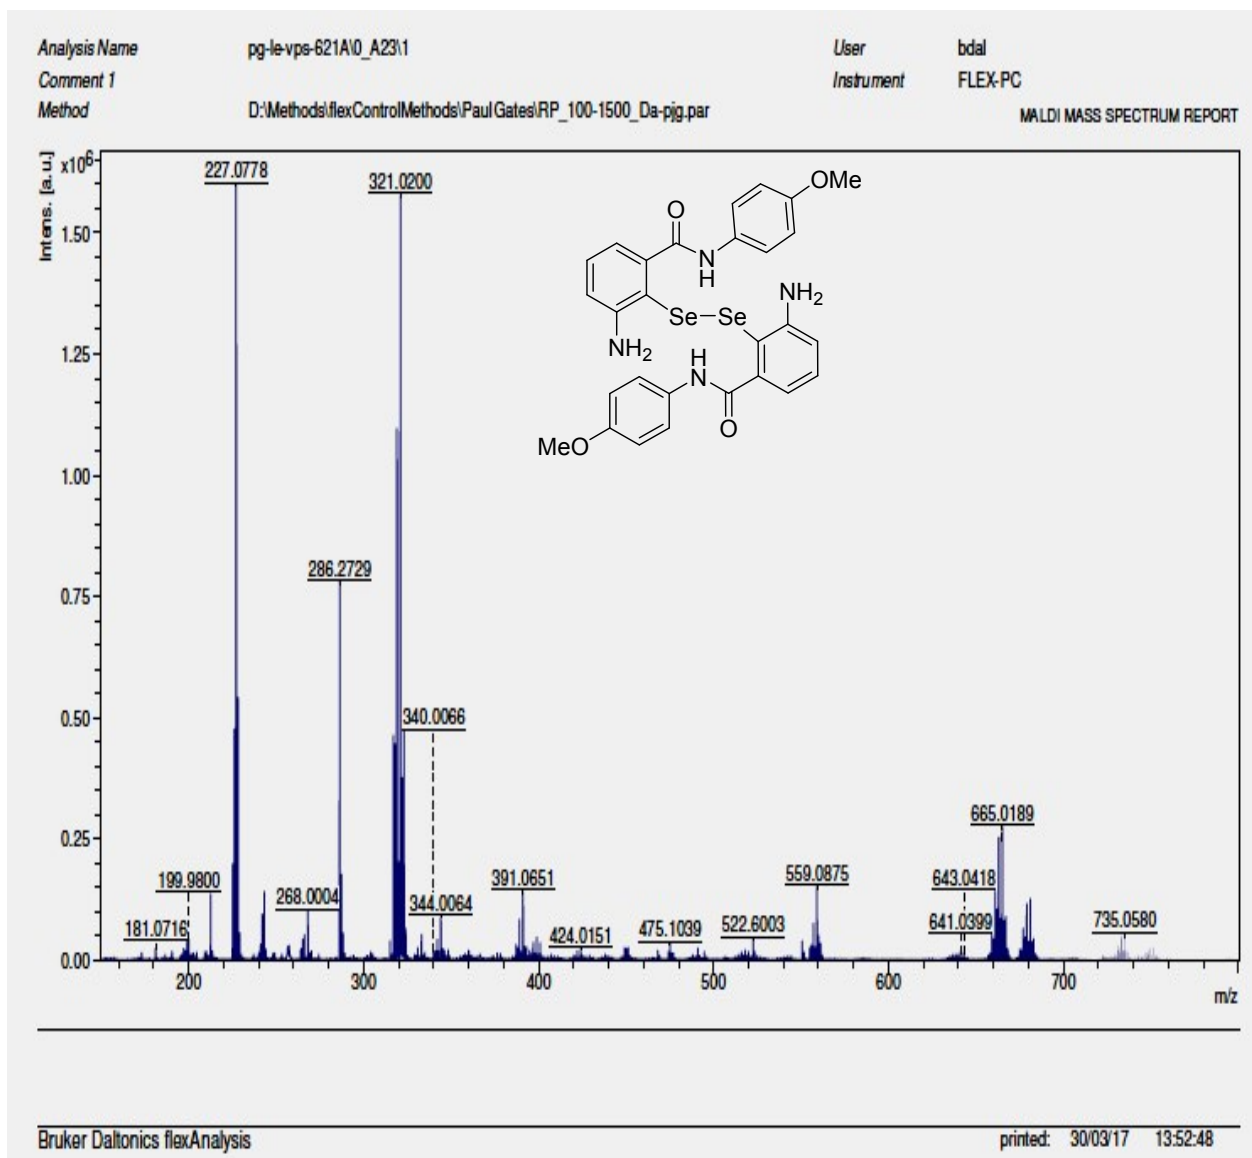

**Figure S10.** Expansion of the HRMS of **5c**

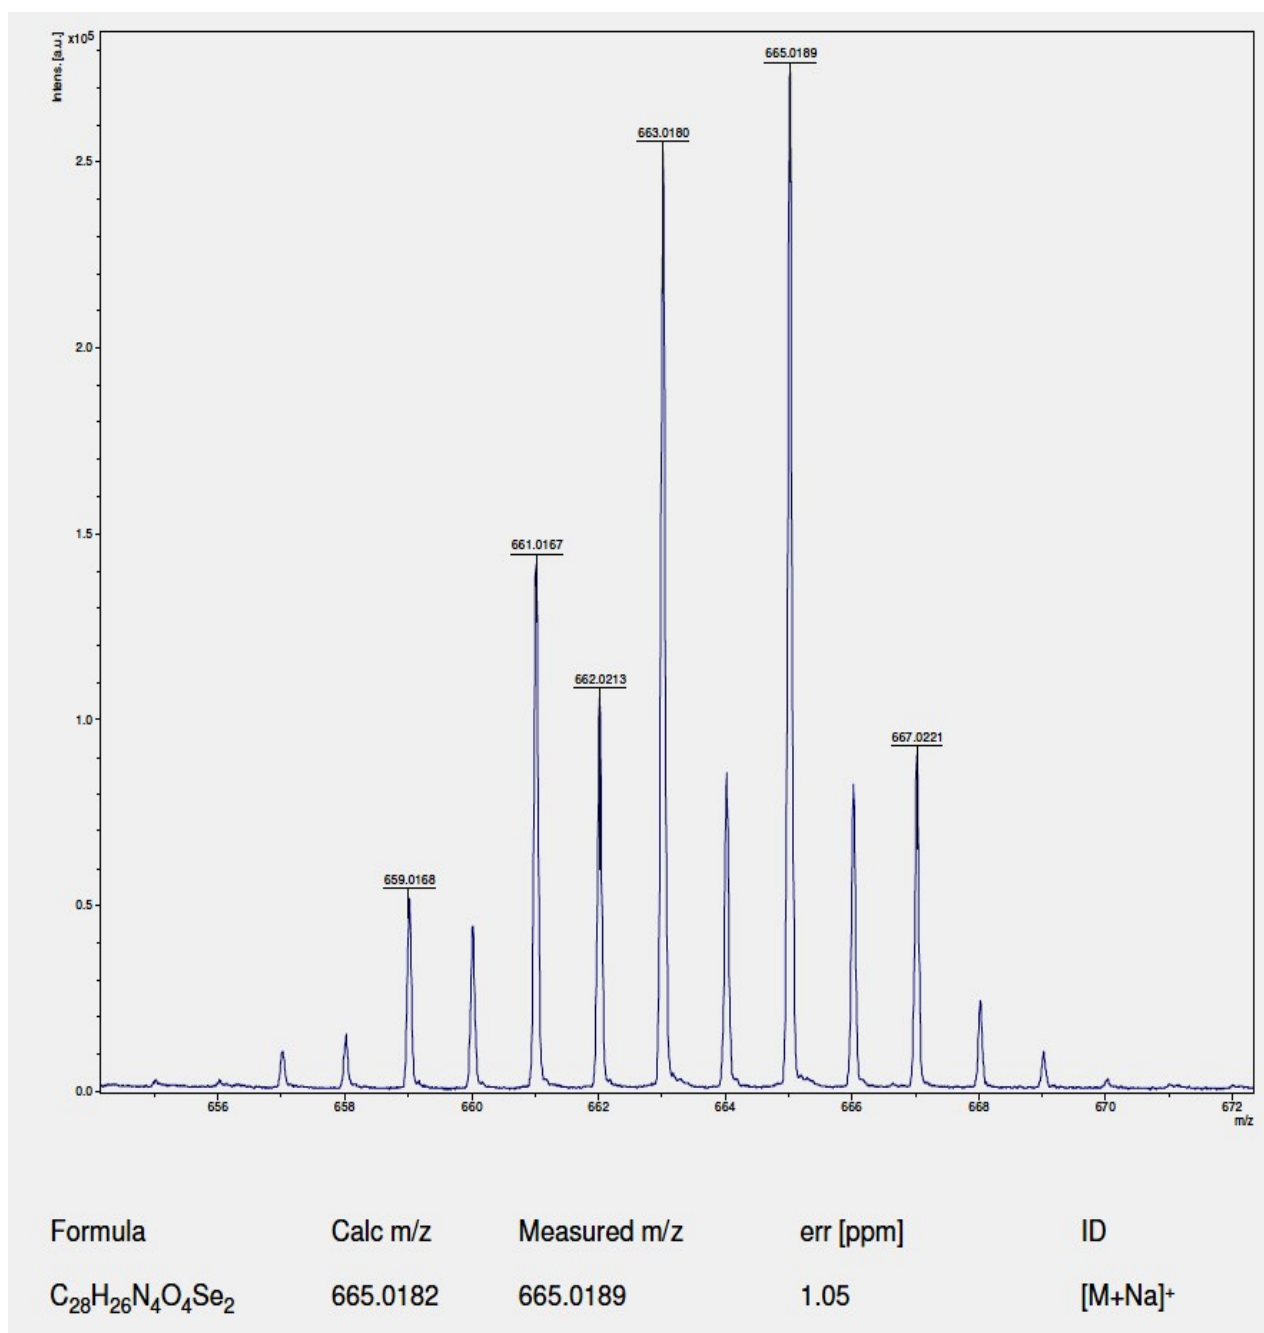

Figure S11. <sup>1</sup>H NMR spectrum of 6a

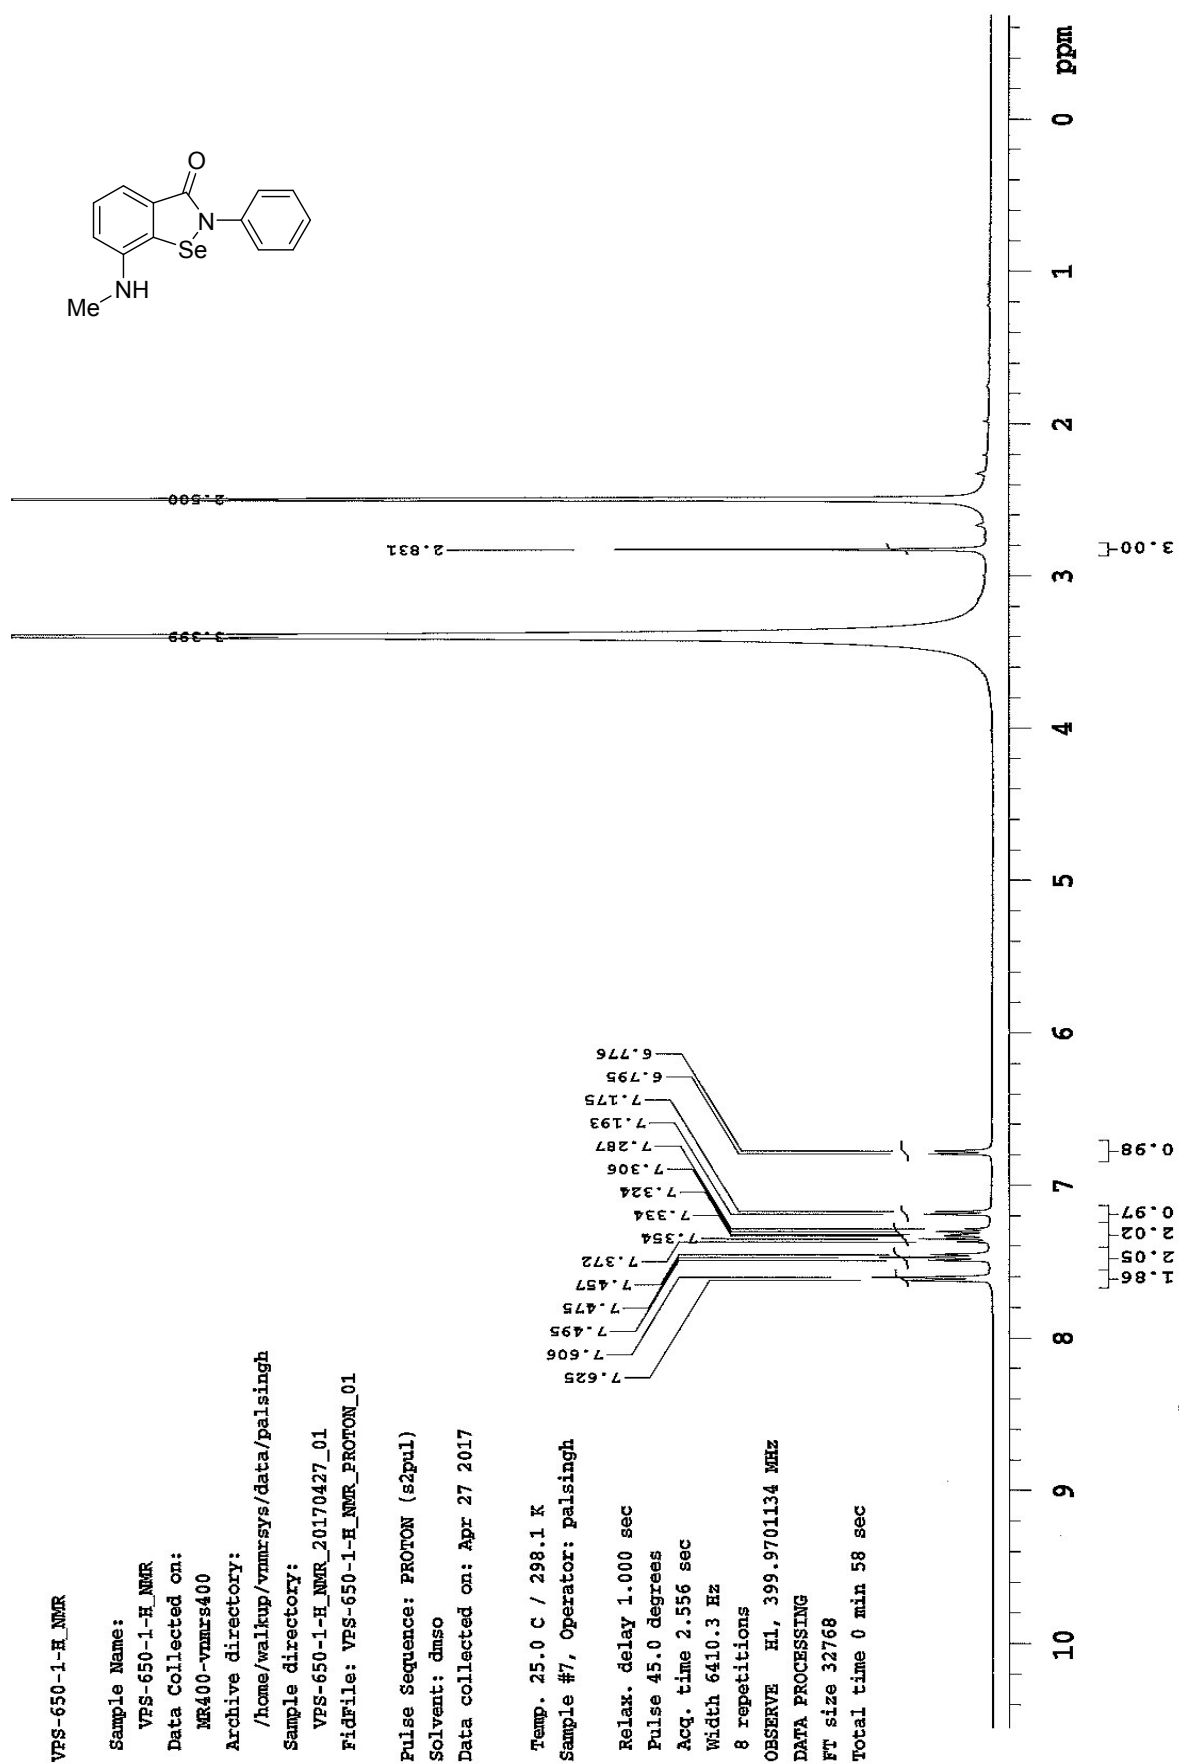

Figure S12. <sup>13</sup>C NMR spectrum of 6a

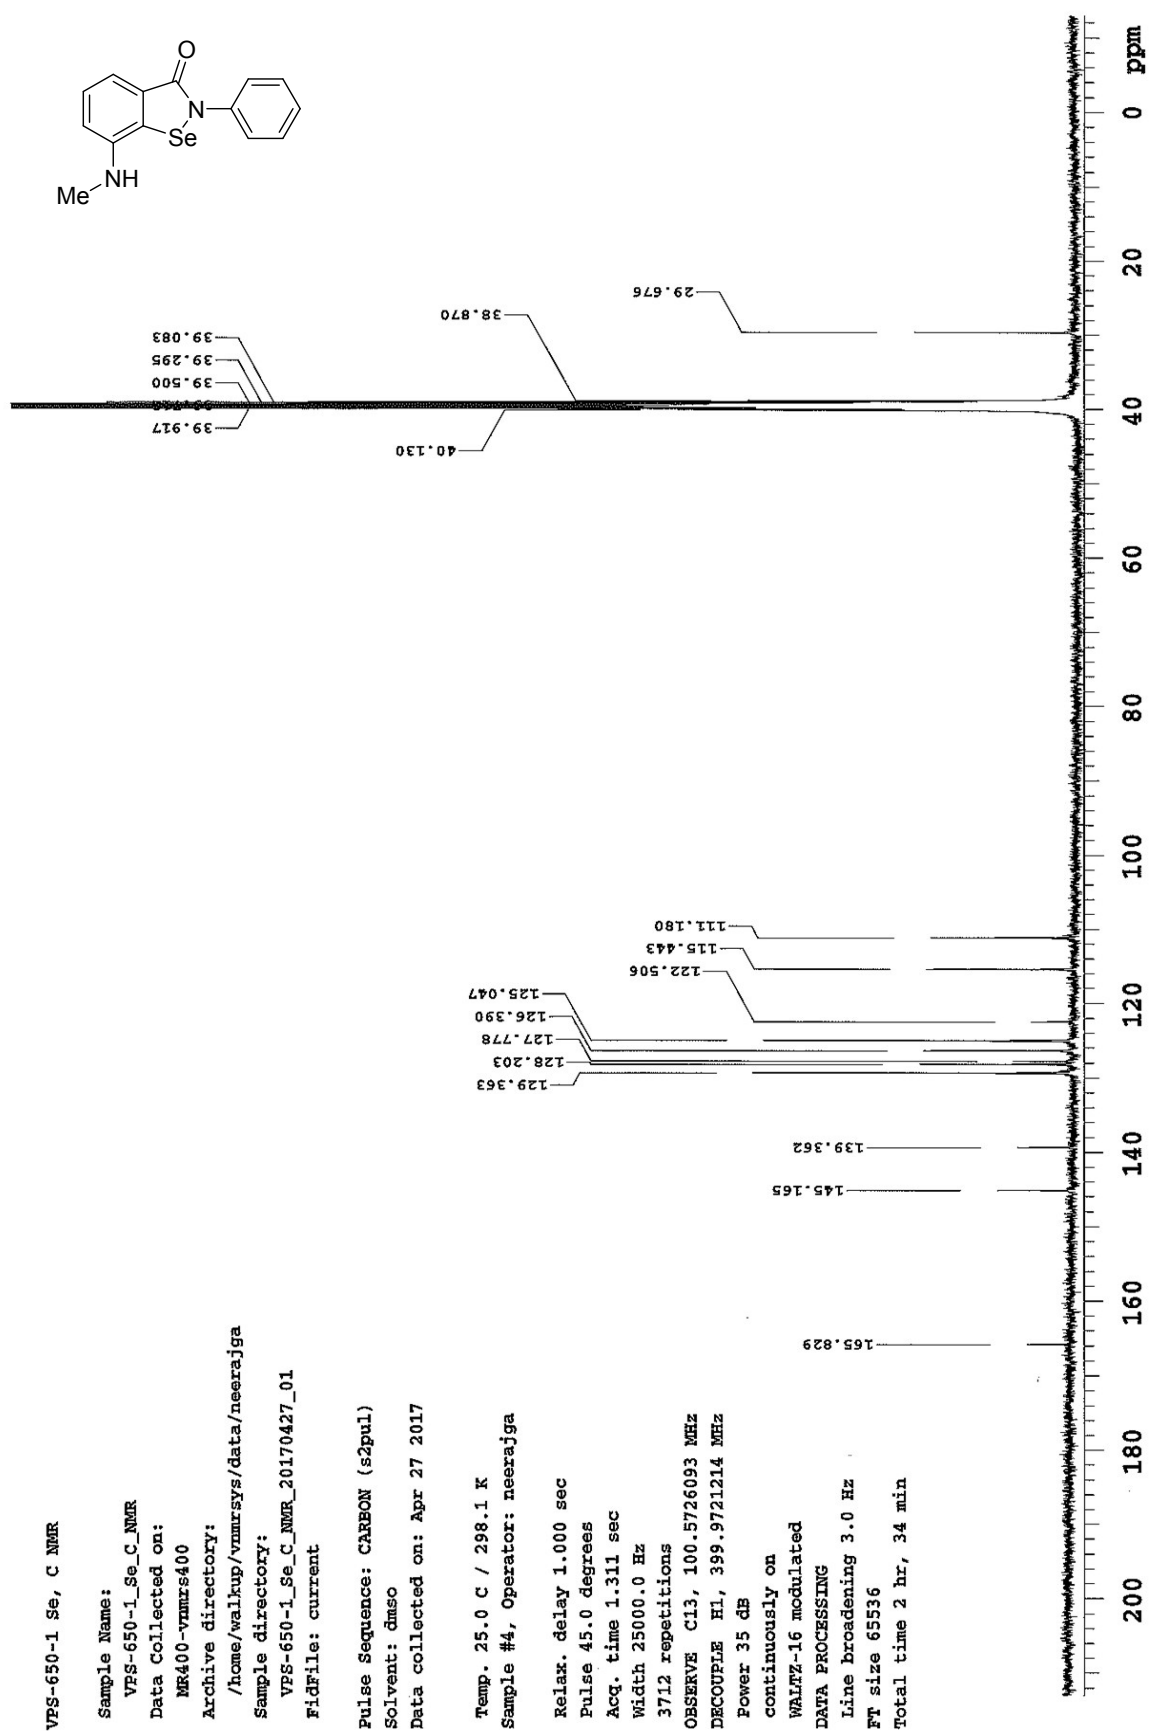

Figure S13.  $^{77}\text{Se}$  NMR spectrum of **6a**

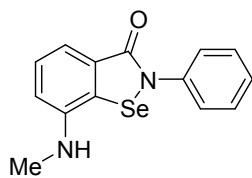

VPS-650-1 Se, C NMR

Sample Name:  
VPS-650-1\_Se\_C\_NMR  
Data Collected on:  
MR400-vnmrs400  
Archive directory:  
/home/walkup/vnmrsys/data/neeerajga  
Sample directory:  
VPS-650-1\_Se\_C\_NMR\_20170427\_01  
FidFile: VPS-650-1\_Se\_C\_NMR\_SELENIUM77\_01

Pulse Sequence: SELENIUM77 (s2pul)  
Solvent: dmsc  
Data collected on: Apr 27 2017

Temp. 25.0 C / 298.1 K  
Sample #4, Operator: neerajga

Relax. delay 1.000 sec  
Pulse 45.0 degrees  
Acq. time 1.992 sec  
Width 131.6 kHz  
4000 repetitions  
OBSERVE Se77, 76.2803537 MHz  
DECOUPLE H1, 399.9721214 MHz  
Power 35 dB  
on during acquisition  
off during delay  
WALTZ-16 modulated  
DATA PROCESSING  
Line broadening 10.0 Hz  
Ft size 524288  
Total time 3 hr, 19 min

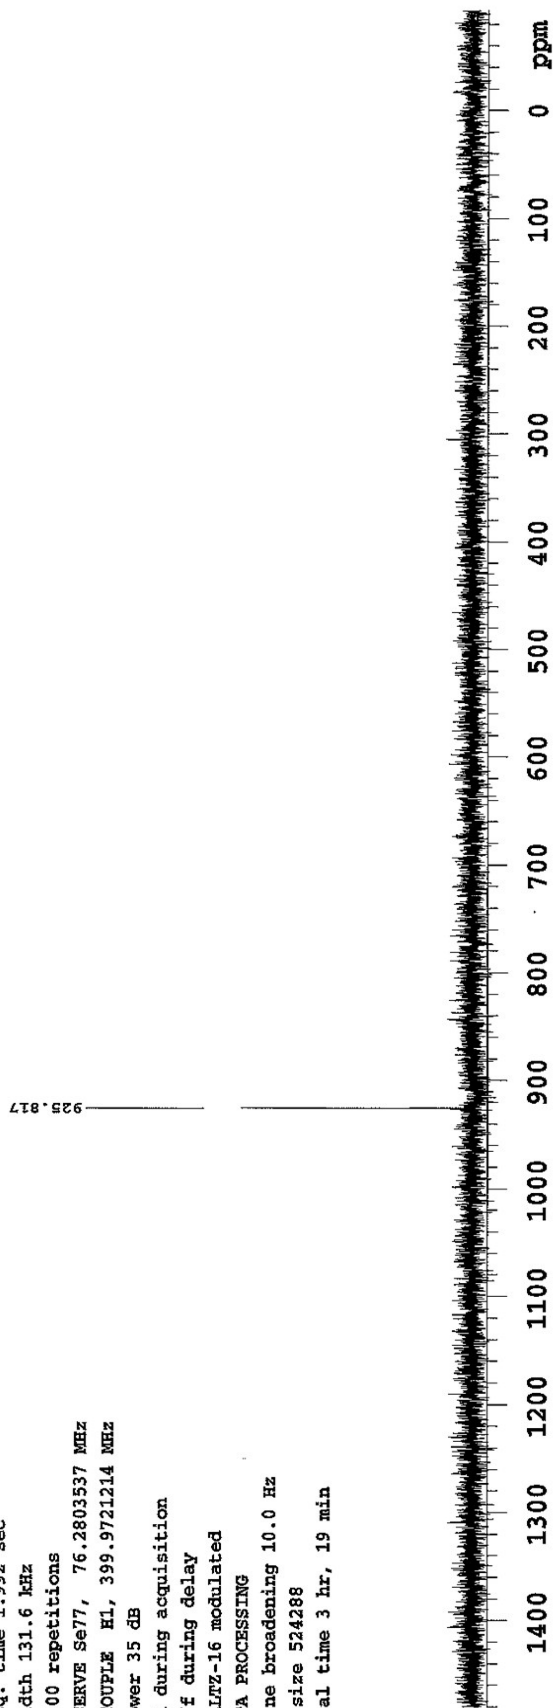

Figure S14. HRMS of 6a

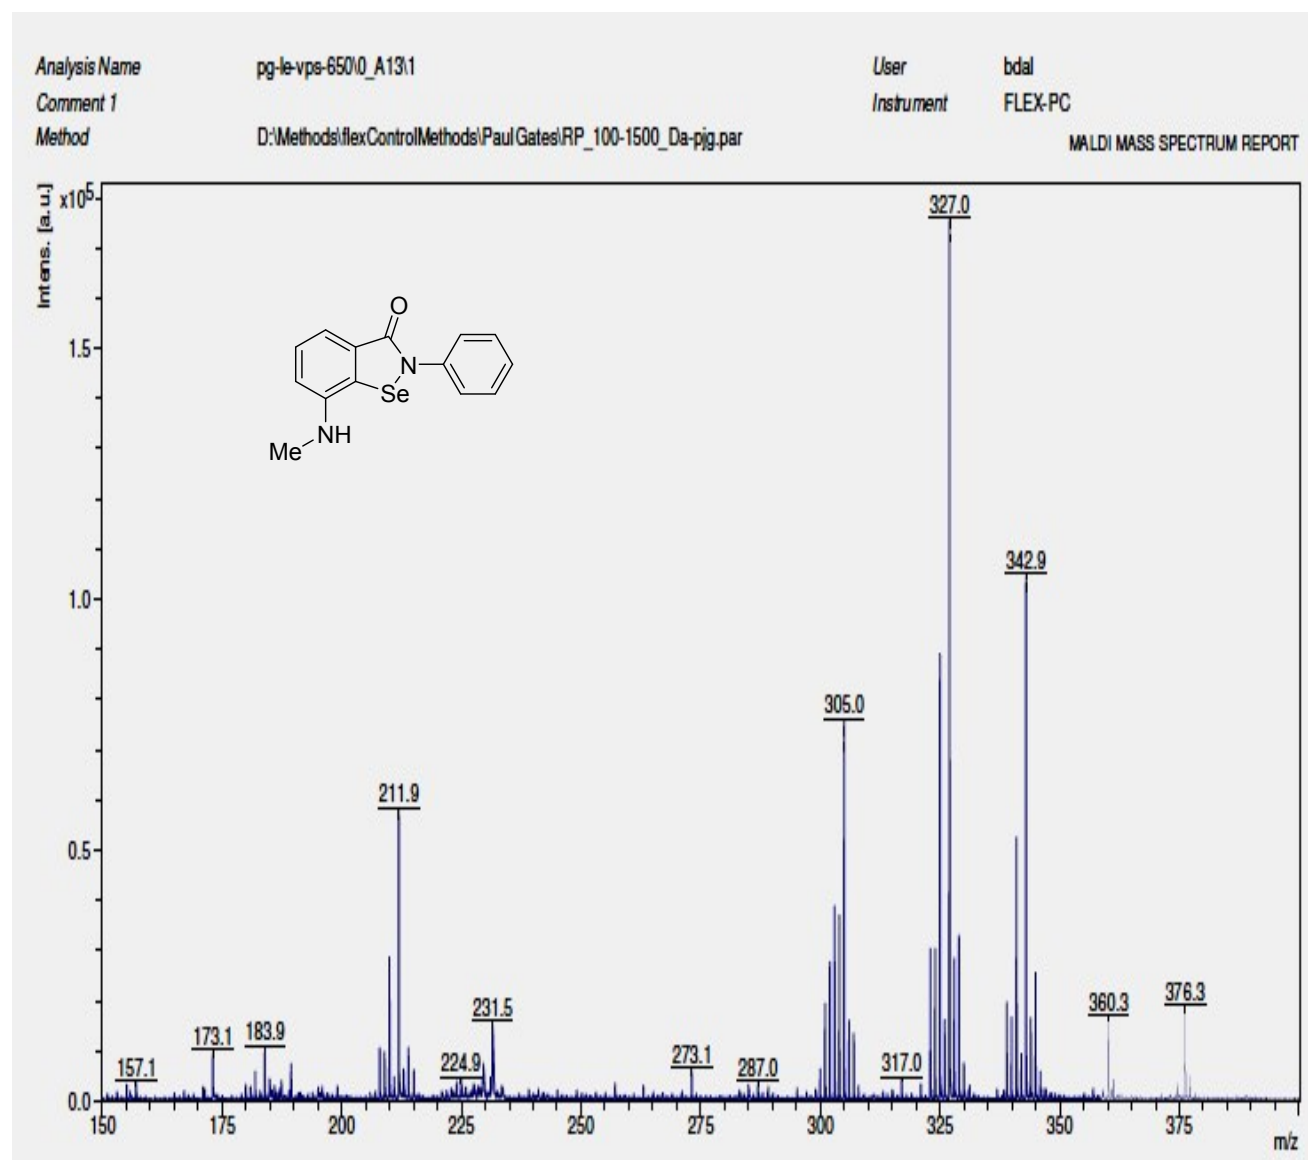



**Figure S15.** Expansion of the HRMS of **6a**

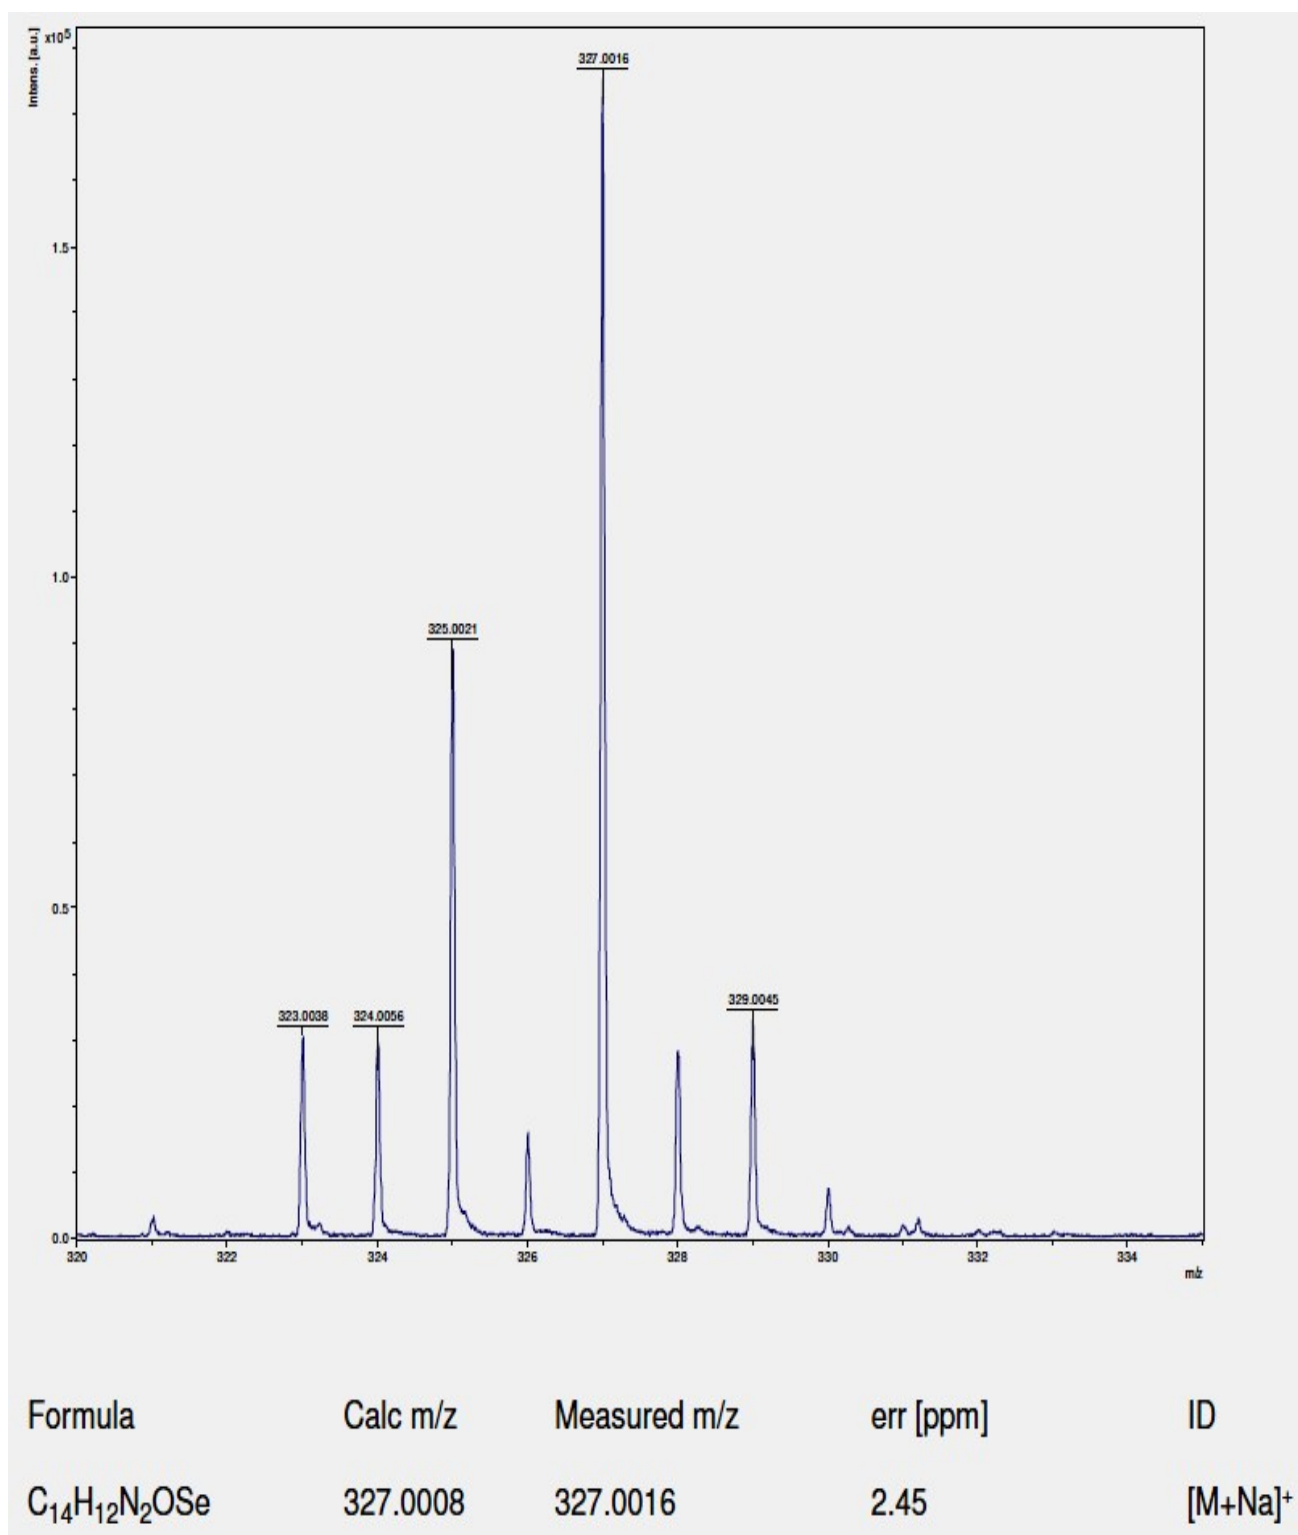

Figure S16. <sup>1</sup>H NMR spectrum of **6b**

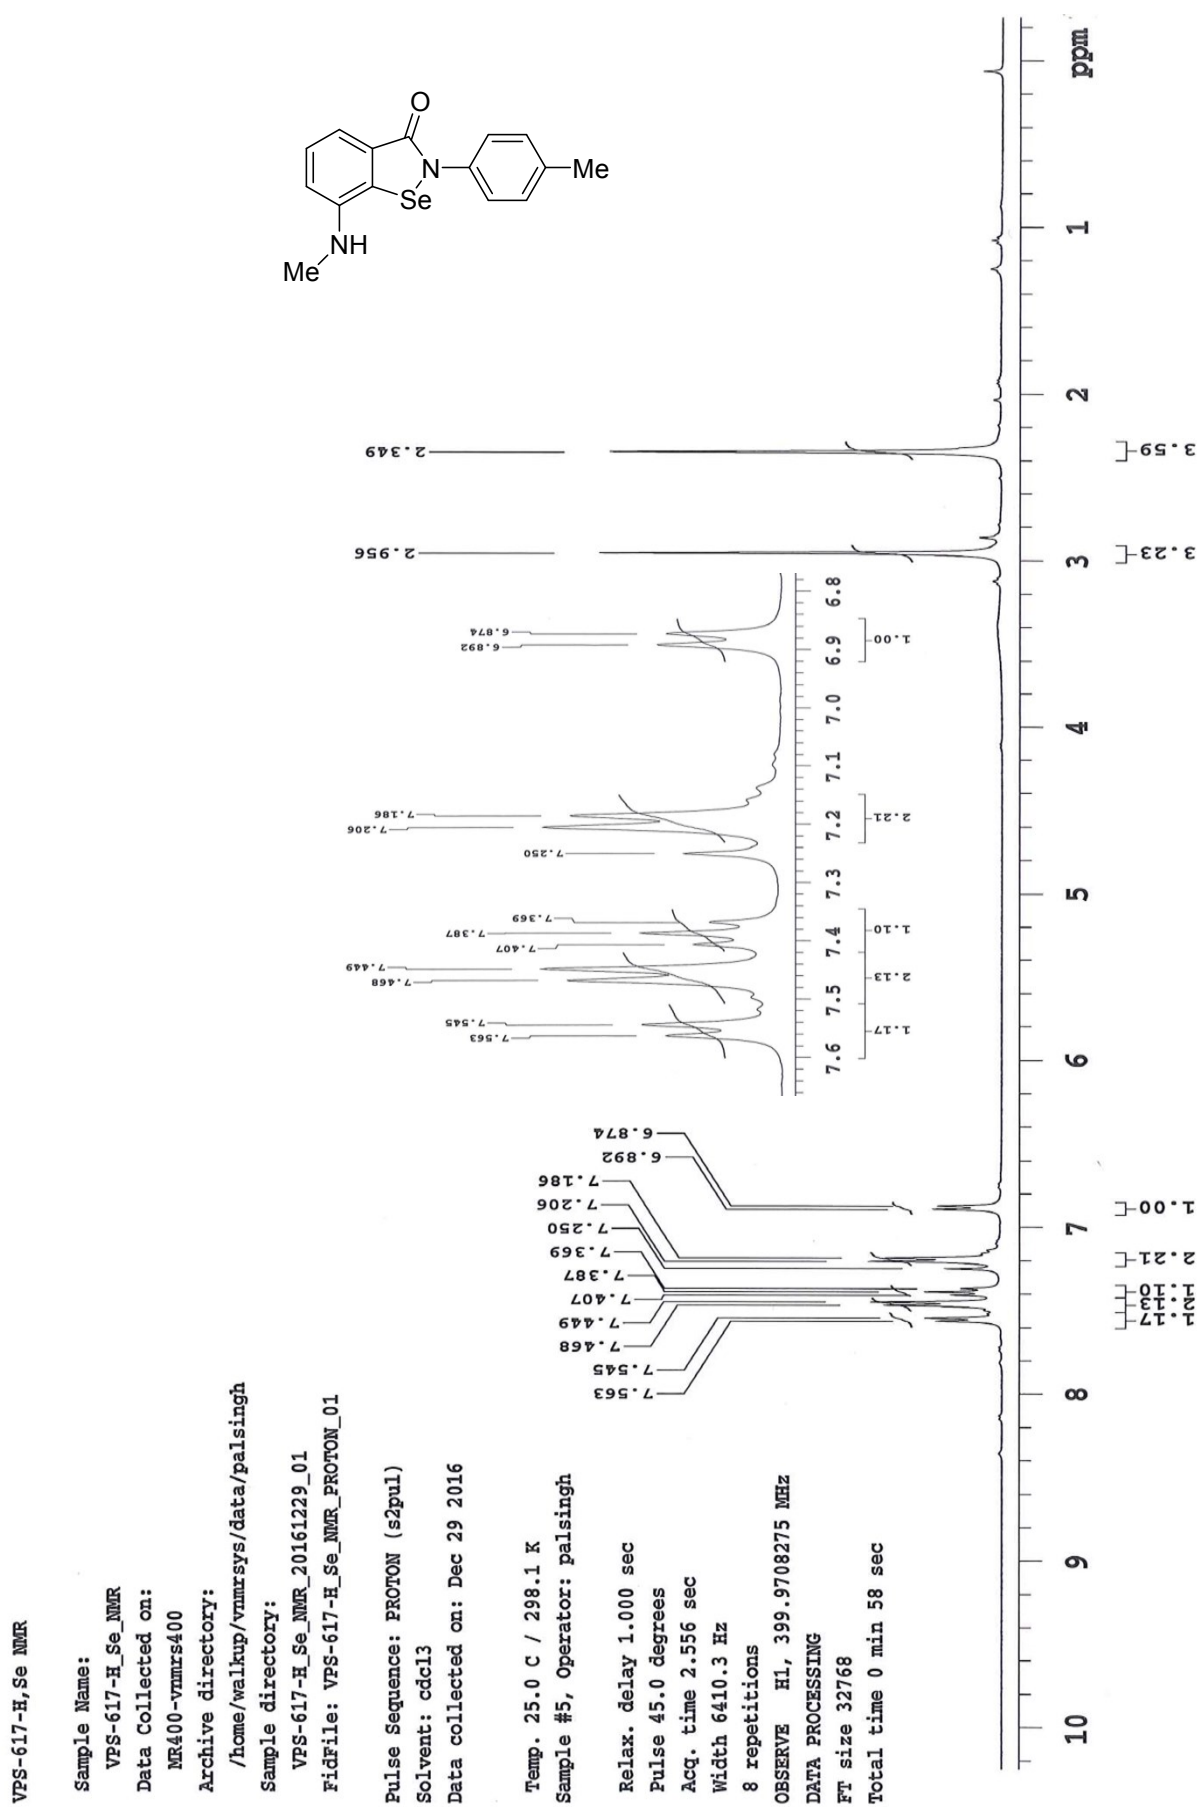

Figure S17. <sup>13</sup>C NMR spectrum of **6b**

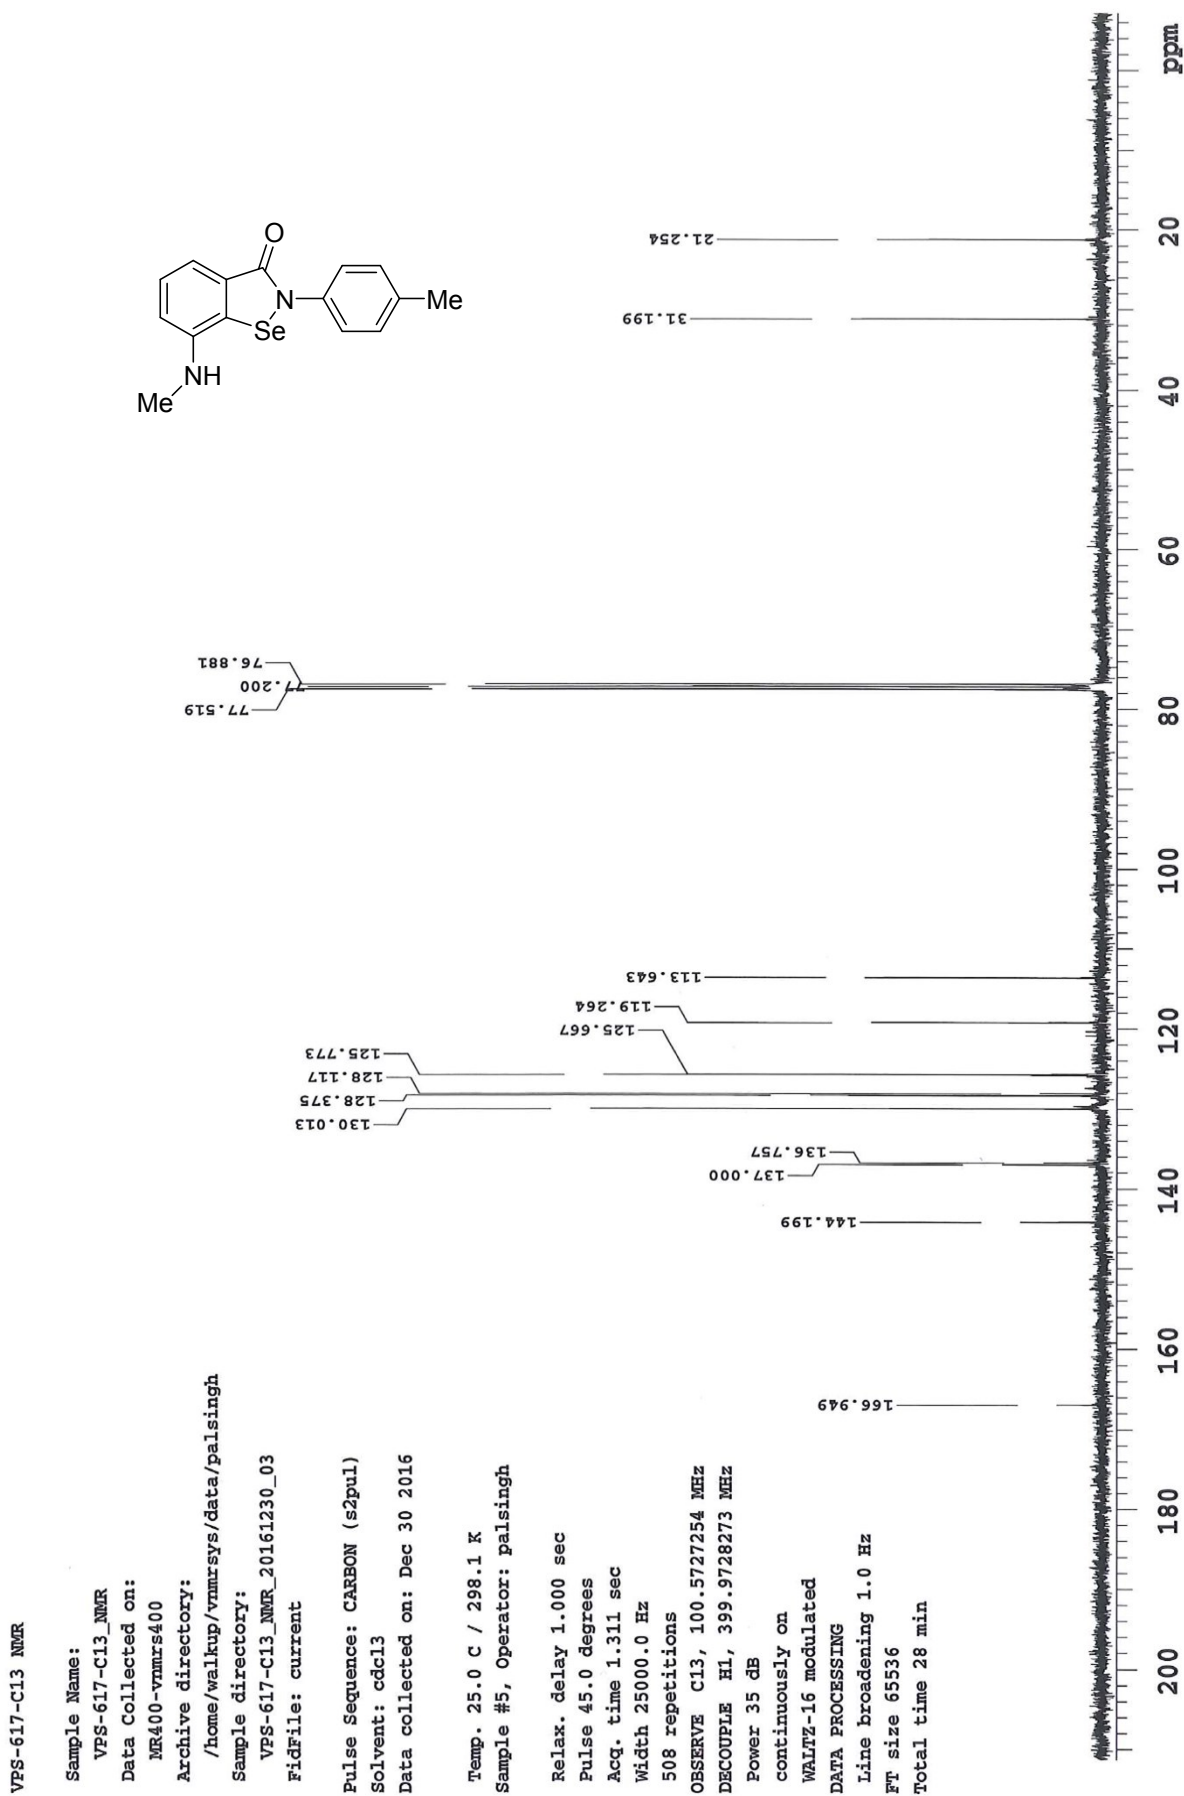

Figure S18. <sup>77</sup>Se NMR spectrum of **6b**

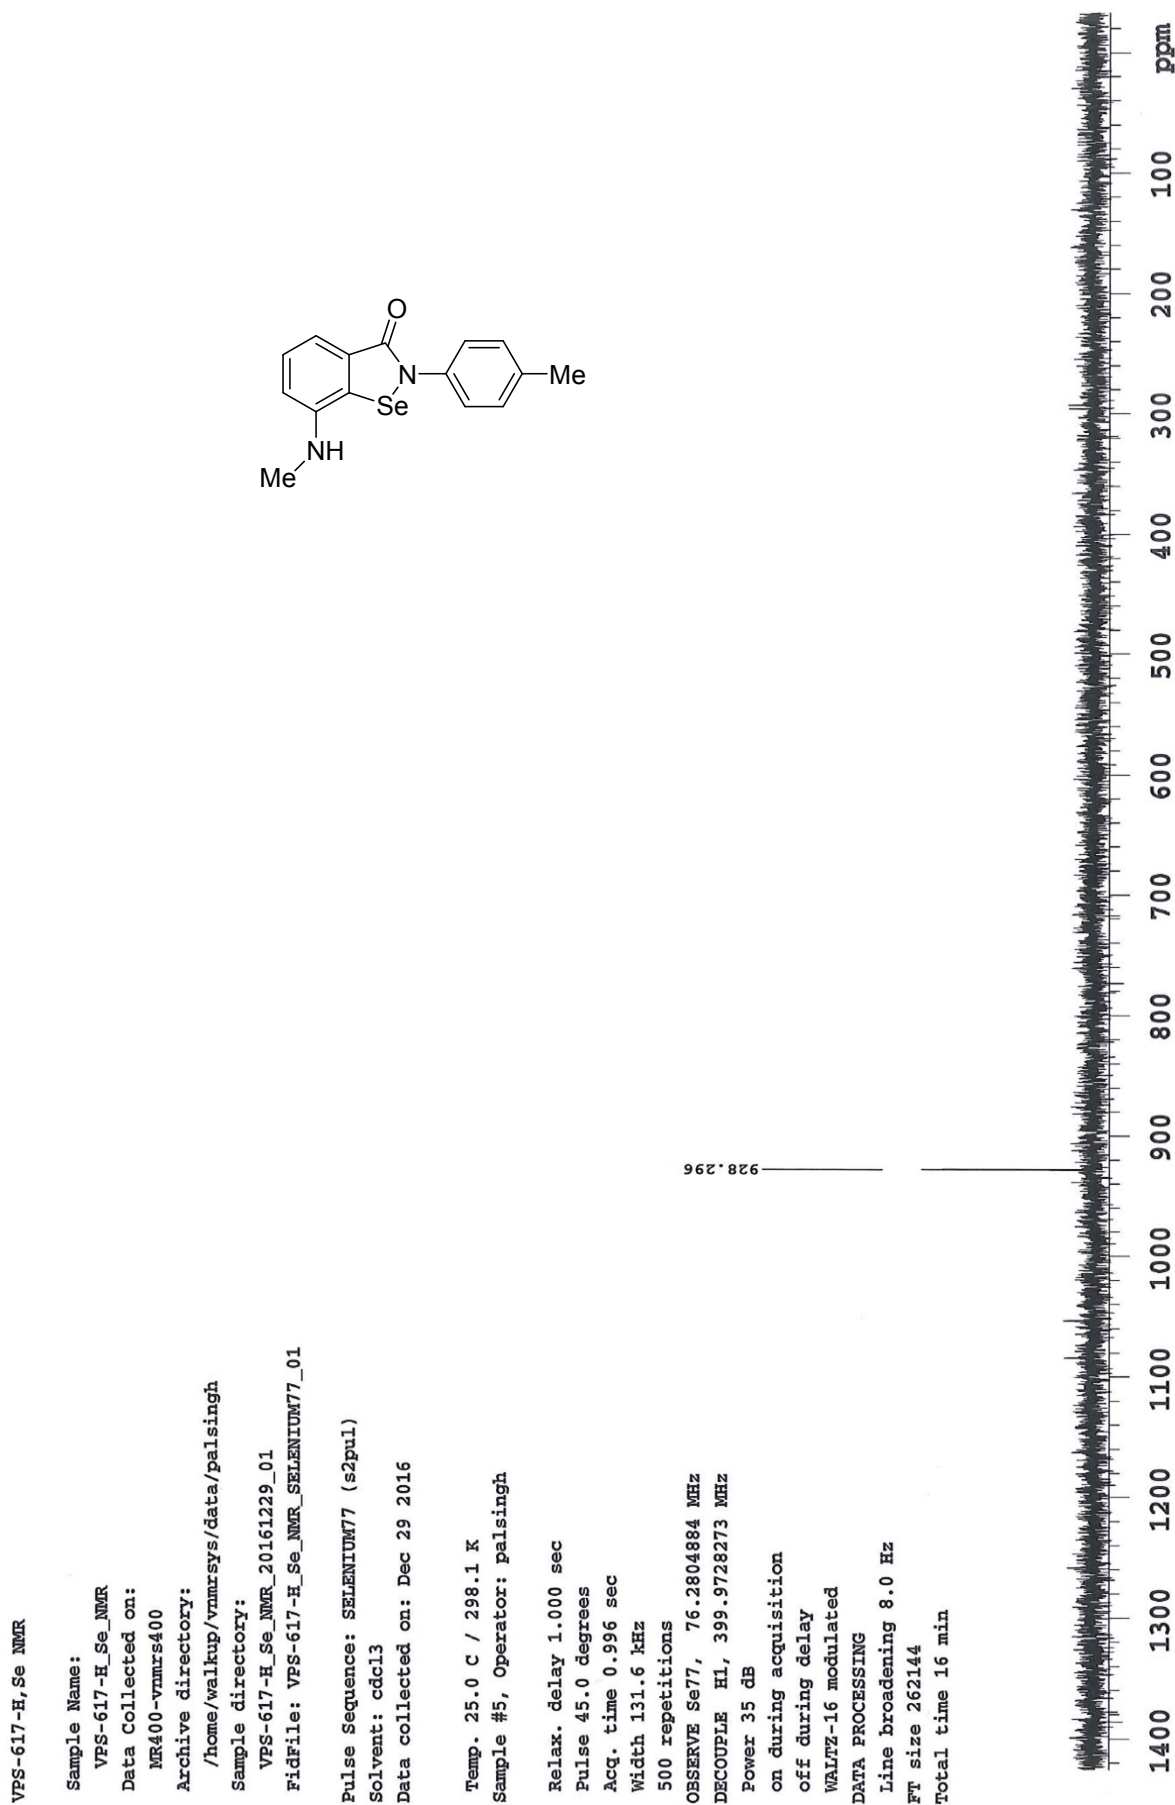

Figure S19. HRMS of 6b

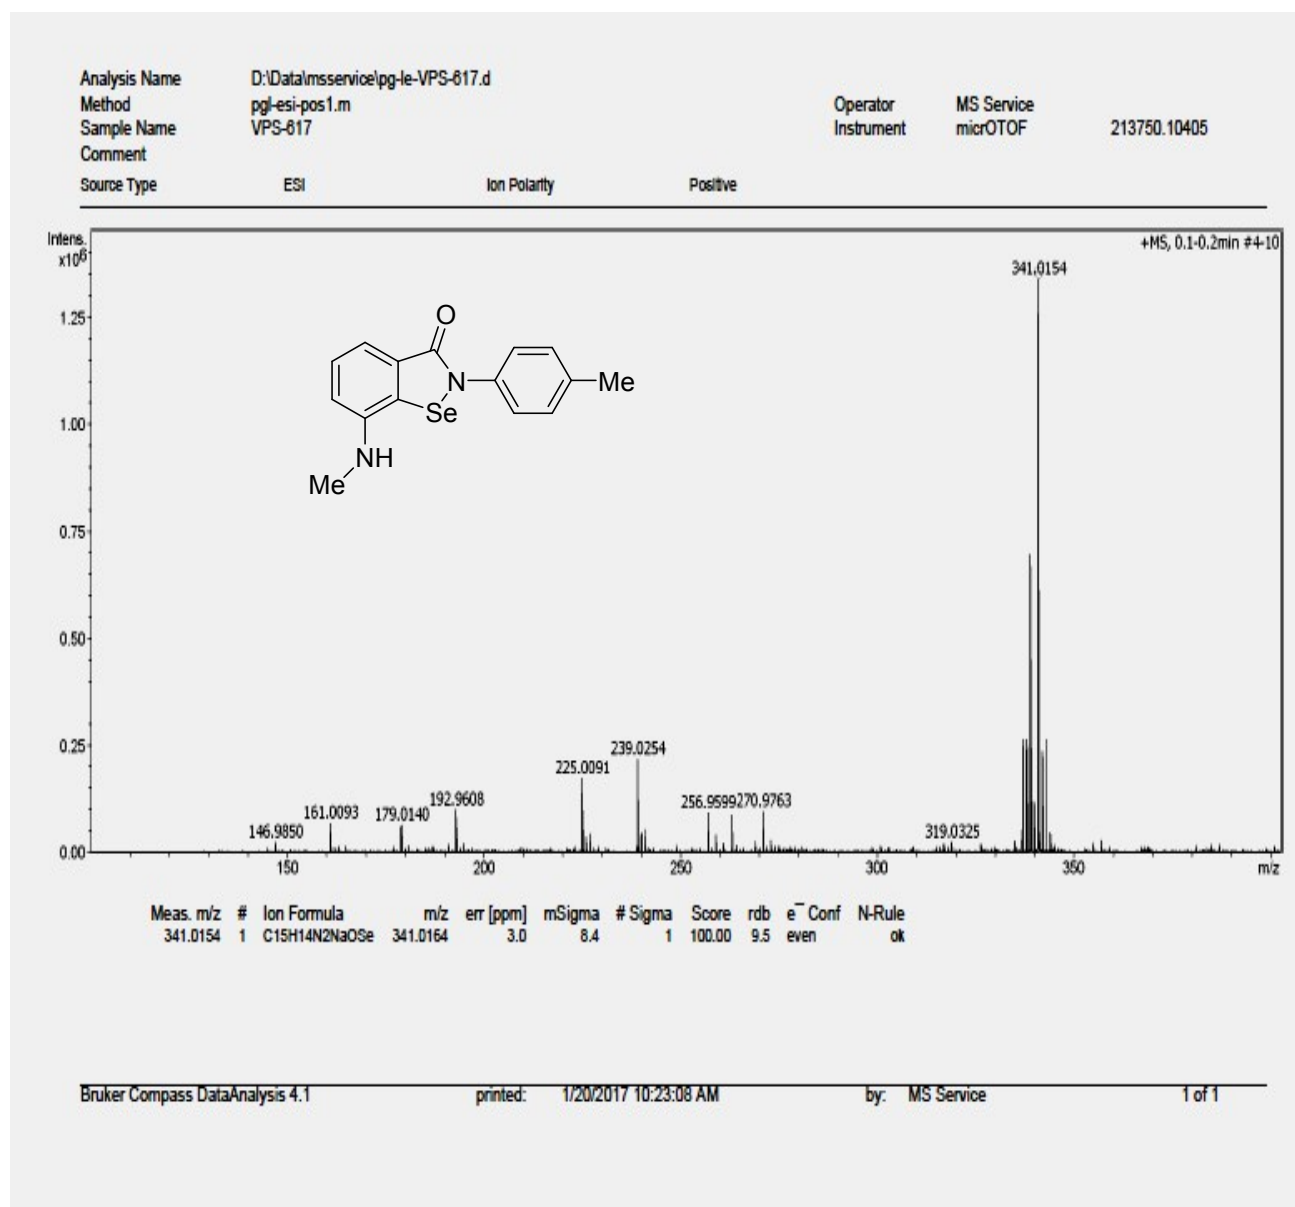



Figure S21. <sup>13</sup>C NMR spectrum of **6c**

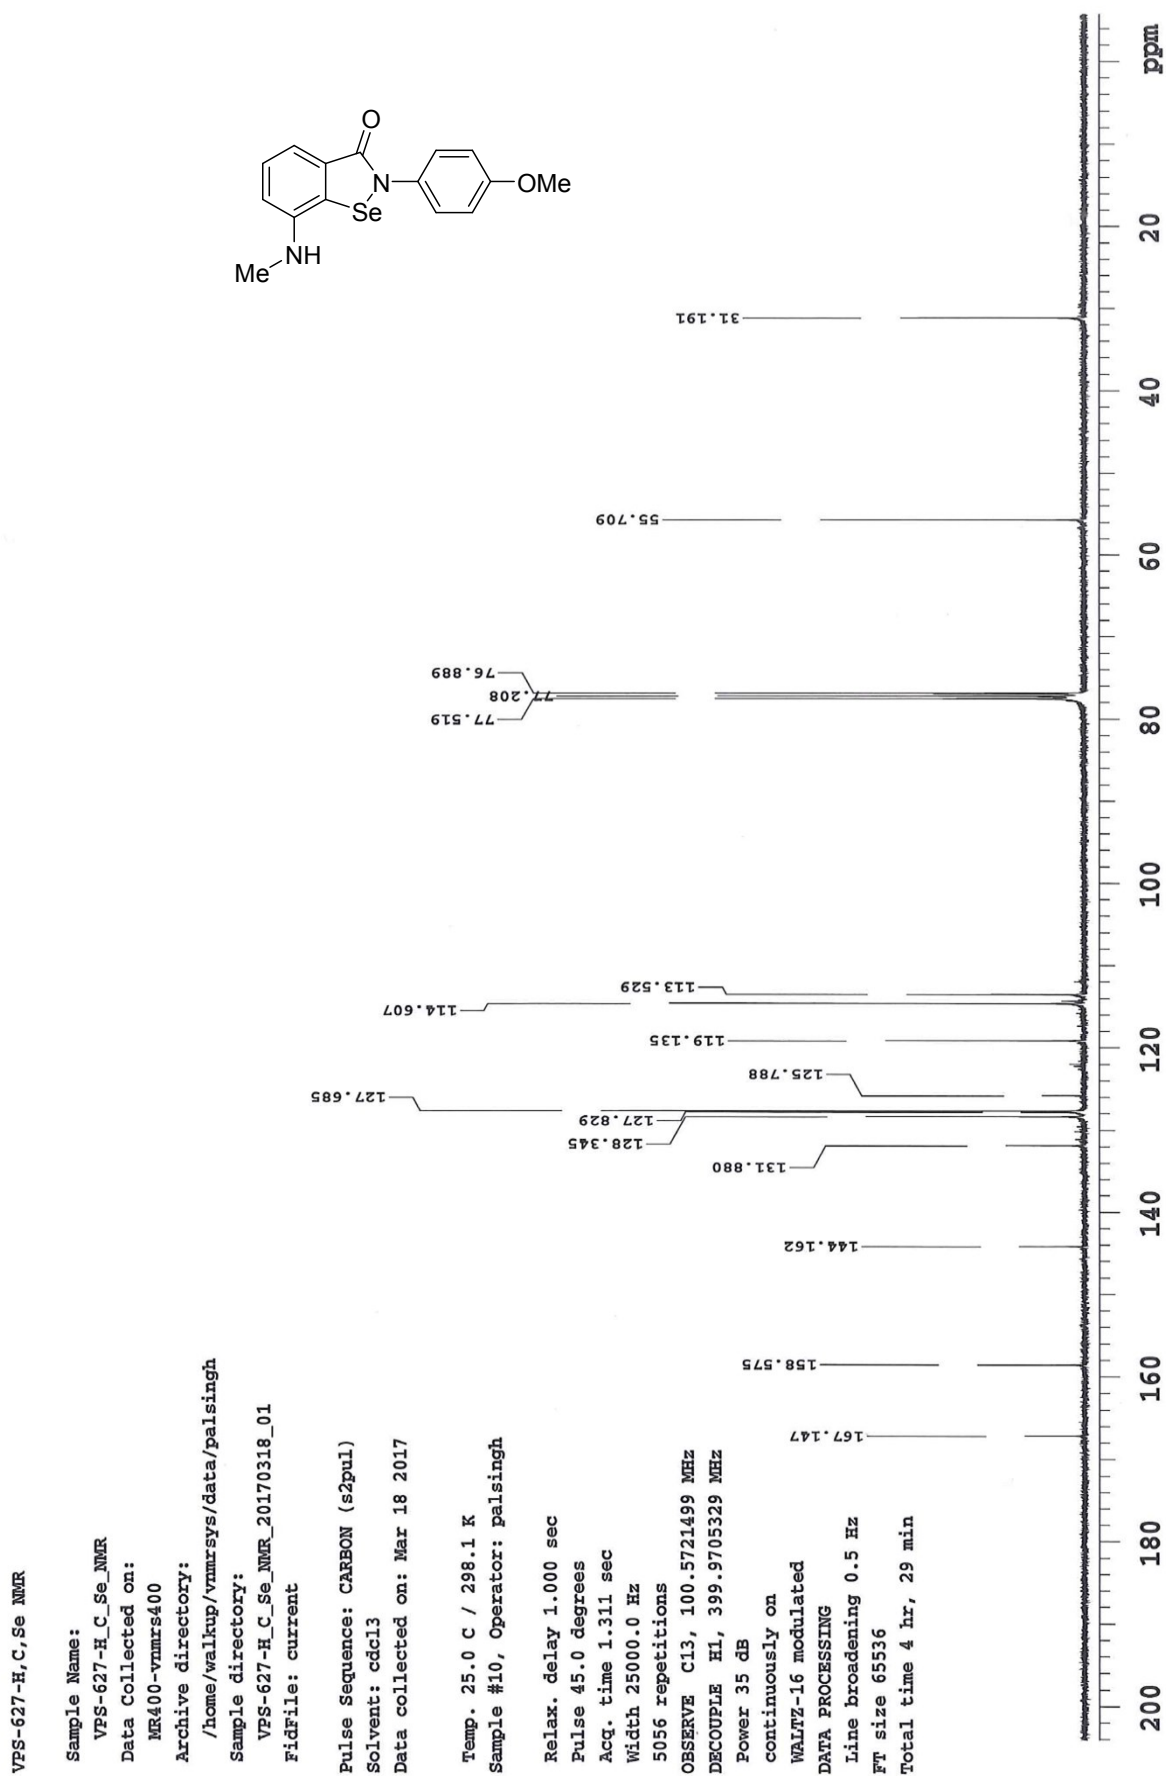



Figure S22. <sup>77</sup>Se NMR spectrum of 6c

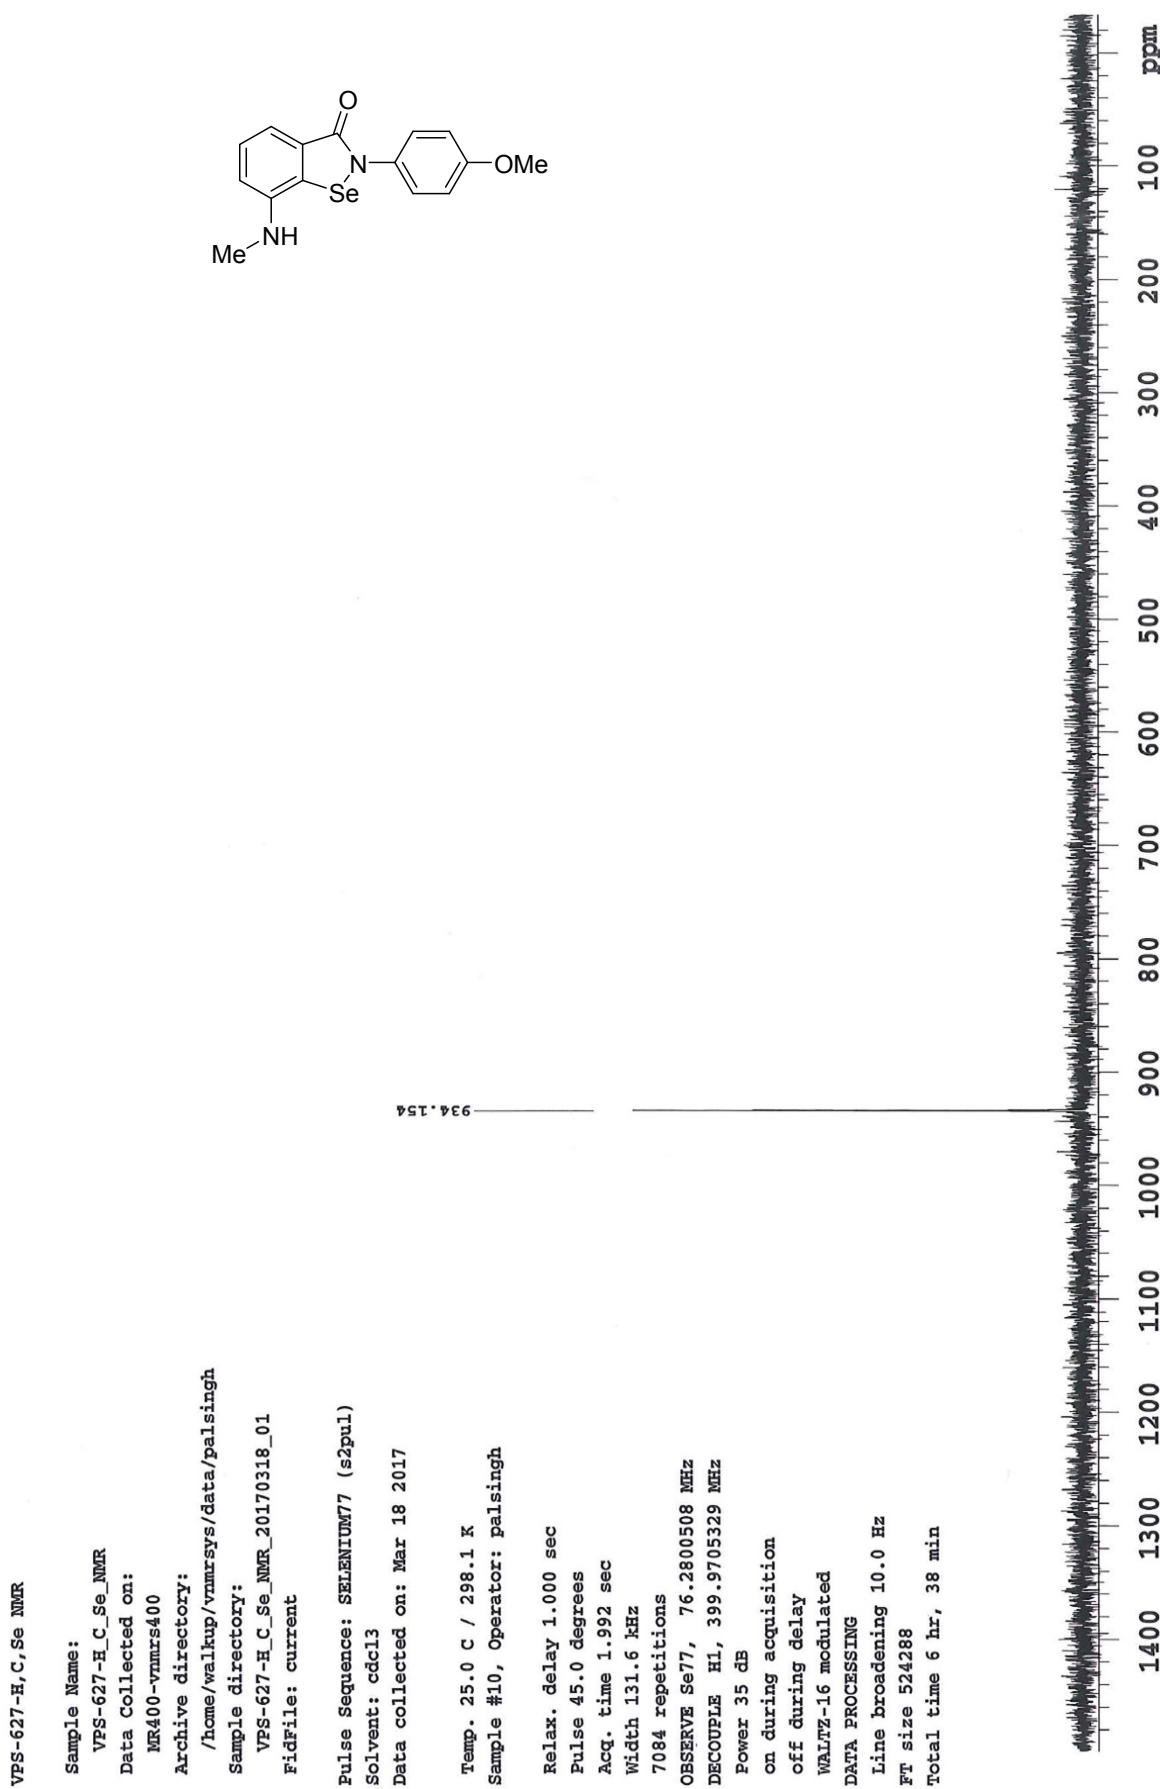



Figure S23. HRMS of 6c

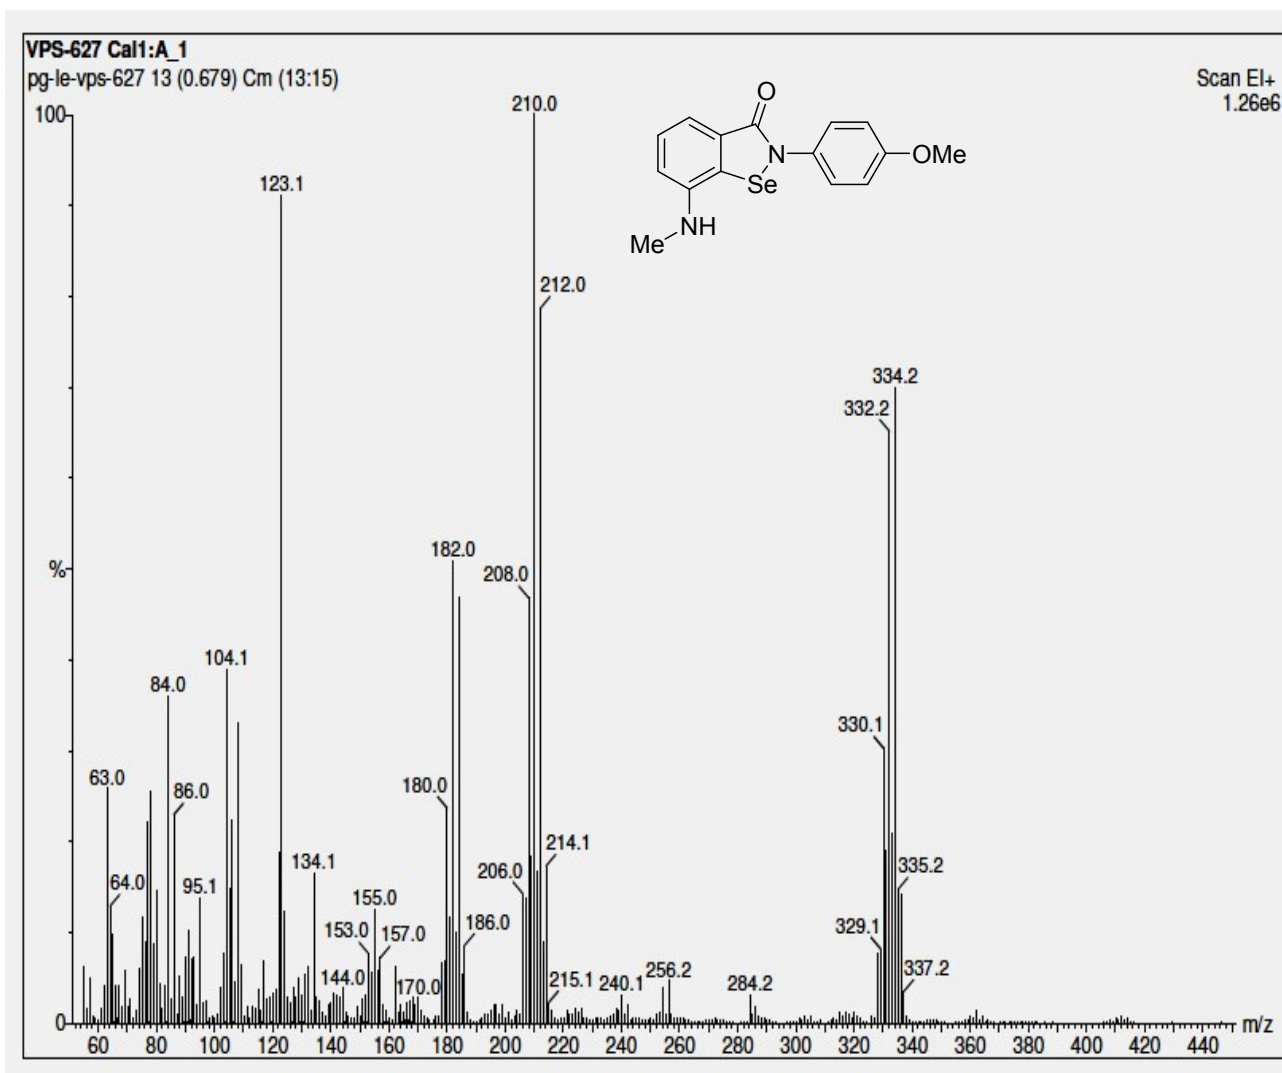

Tolerance = 10.0 PPM / DBE: min = -1.5, max = 80.0  
Isotope cluster parameters: Separation = 1.0 Abundance = 1.0%

Monoisotopic Mass, Odd and Even Electron Ions  
30 formula(e) evaluated with 1 results within limits (up to 50 closest results for each mass)

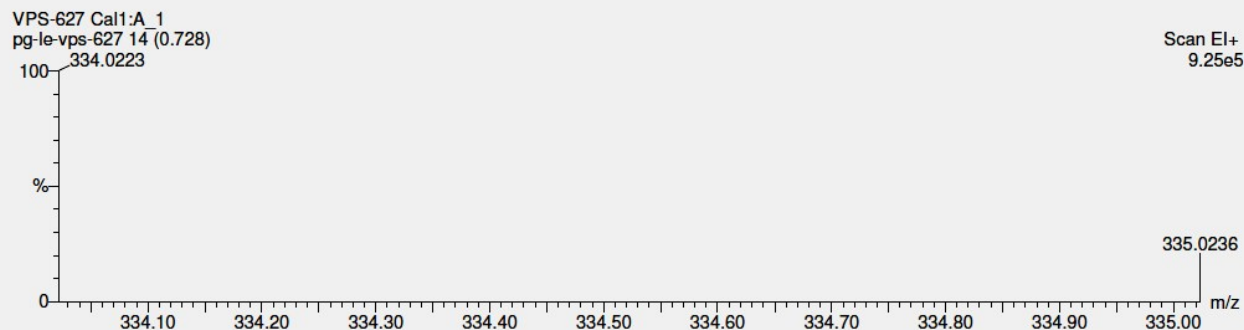

| Mass     | RA     | Calc. Mass | mDa | PPM | DBE  | Score | Formula          |
|----------|--------|------------|-----|-----|------|-------|------------------|
| 334.0223 | 100.00 | 334.0220   | 0.3 | 0.8 | 11.0 | 1     | C15 H14 N2 O2 Se |

Figure S24. <sup>1</sup>H NMR spectrum of 6d

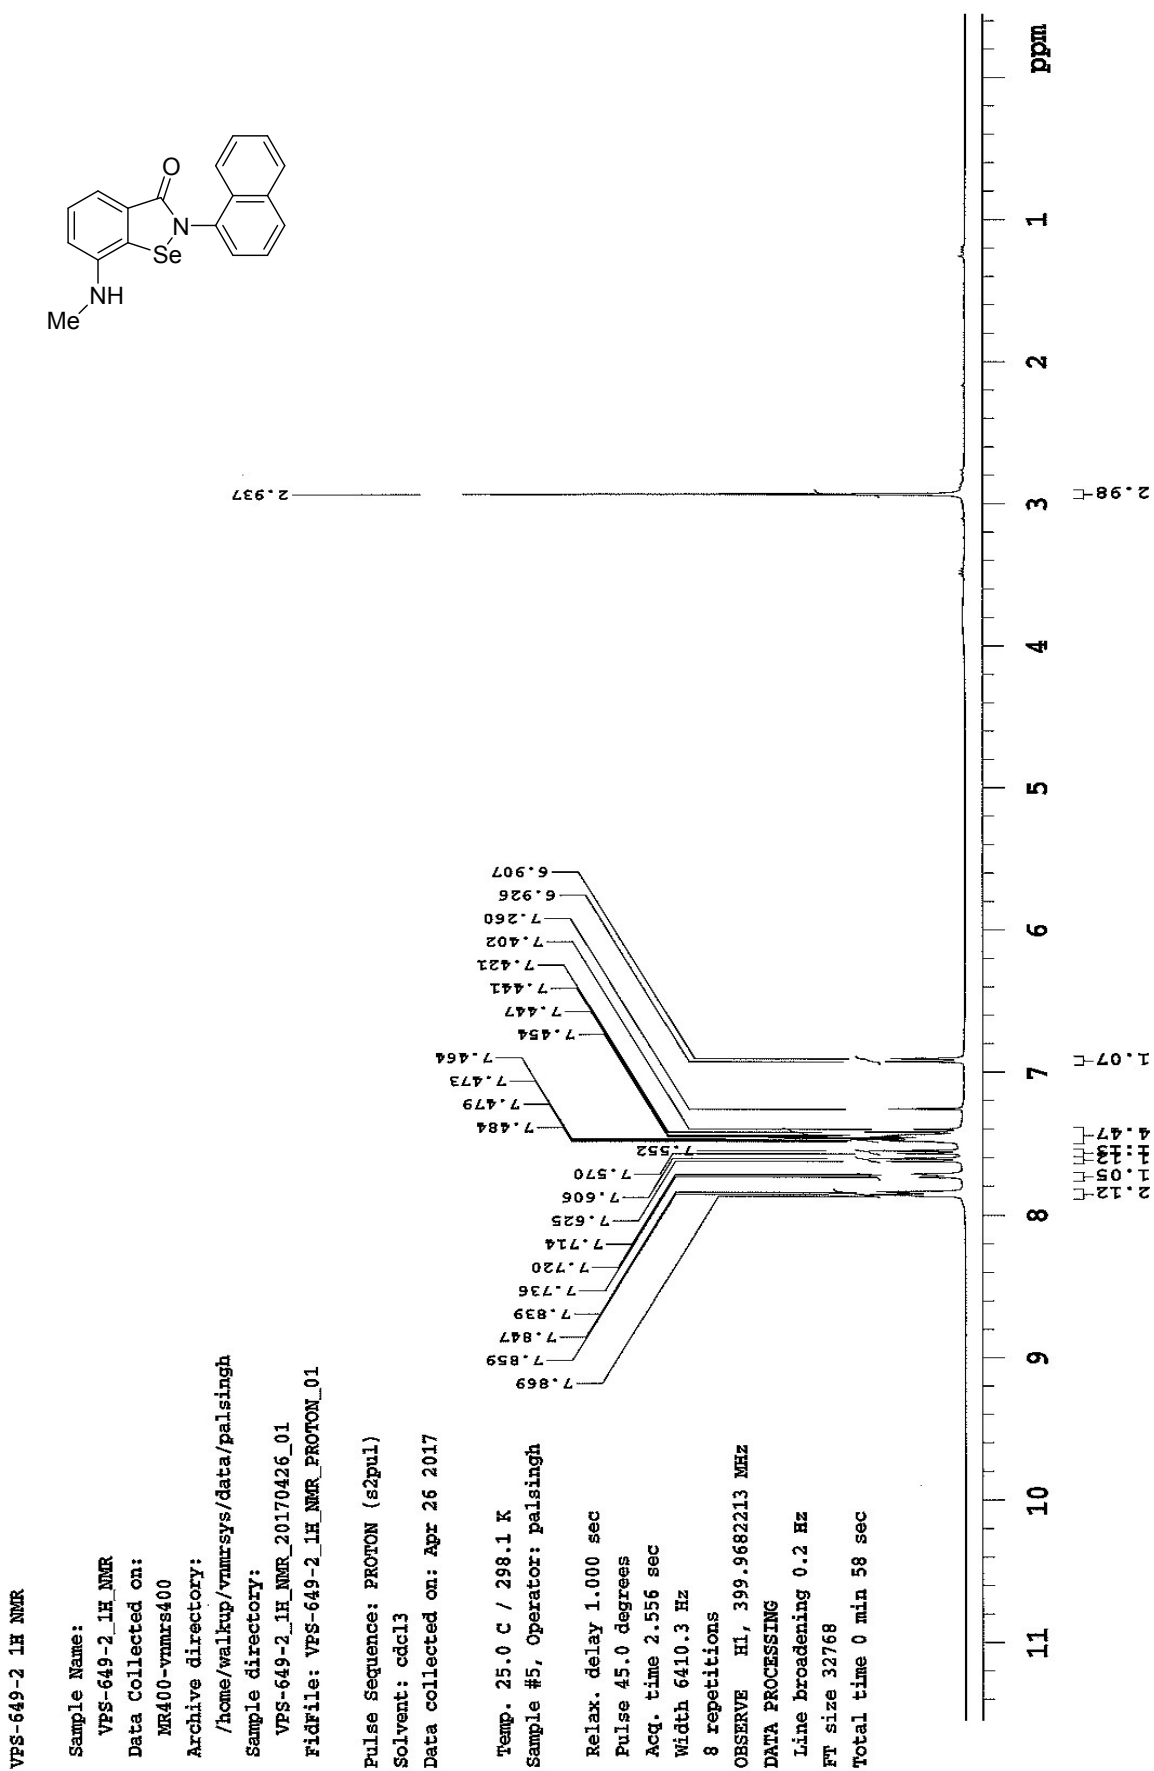

Figure S25. <sup>13</sup>C NMR spectrum of 6d

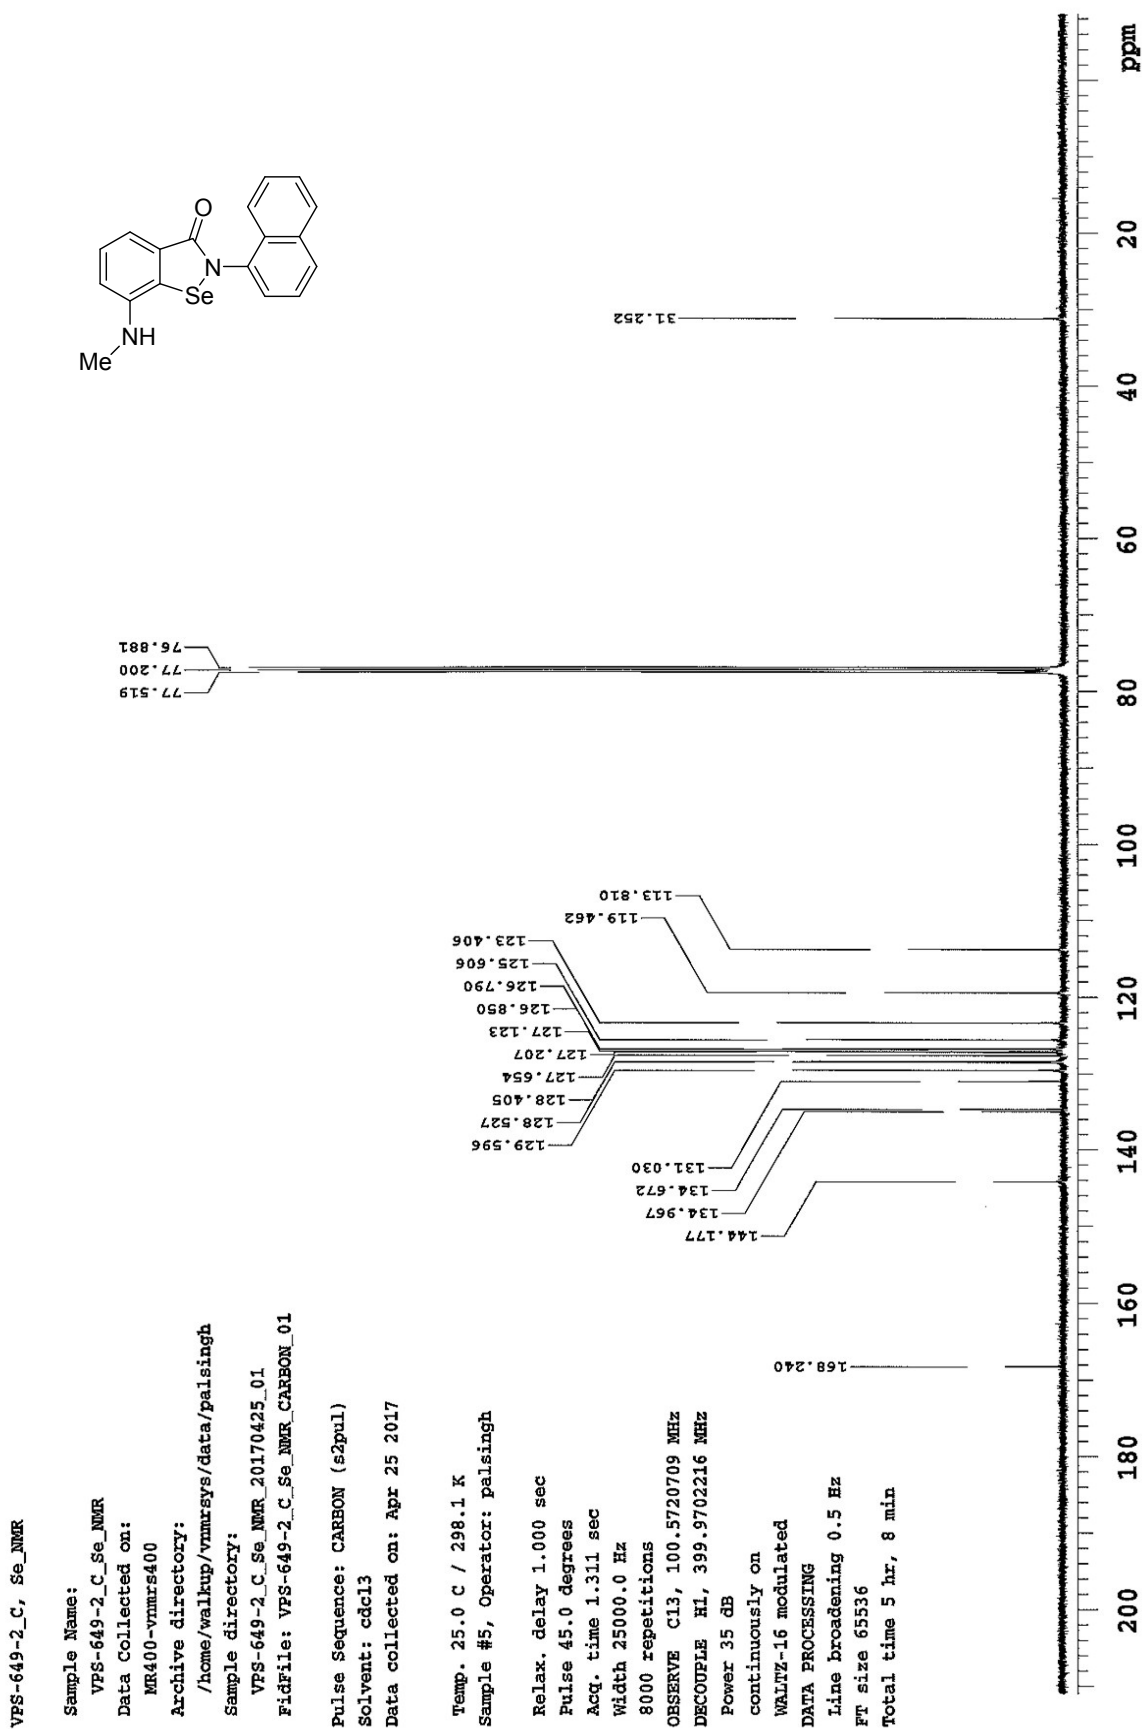

Figure S26.  $^{77}\text{Se}$  NMR spectrum of **6d**

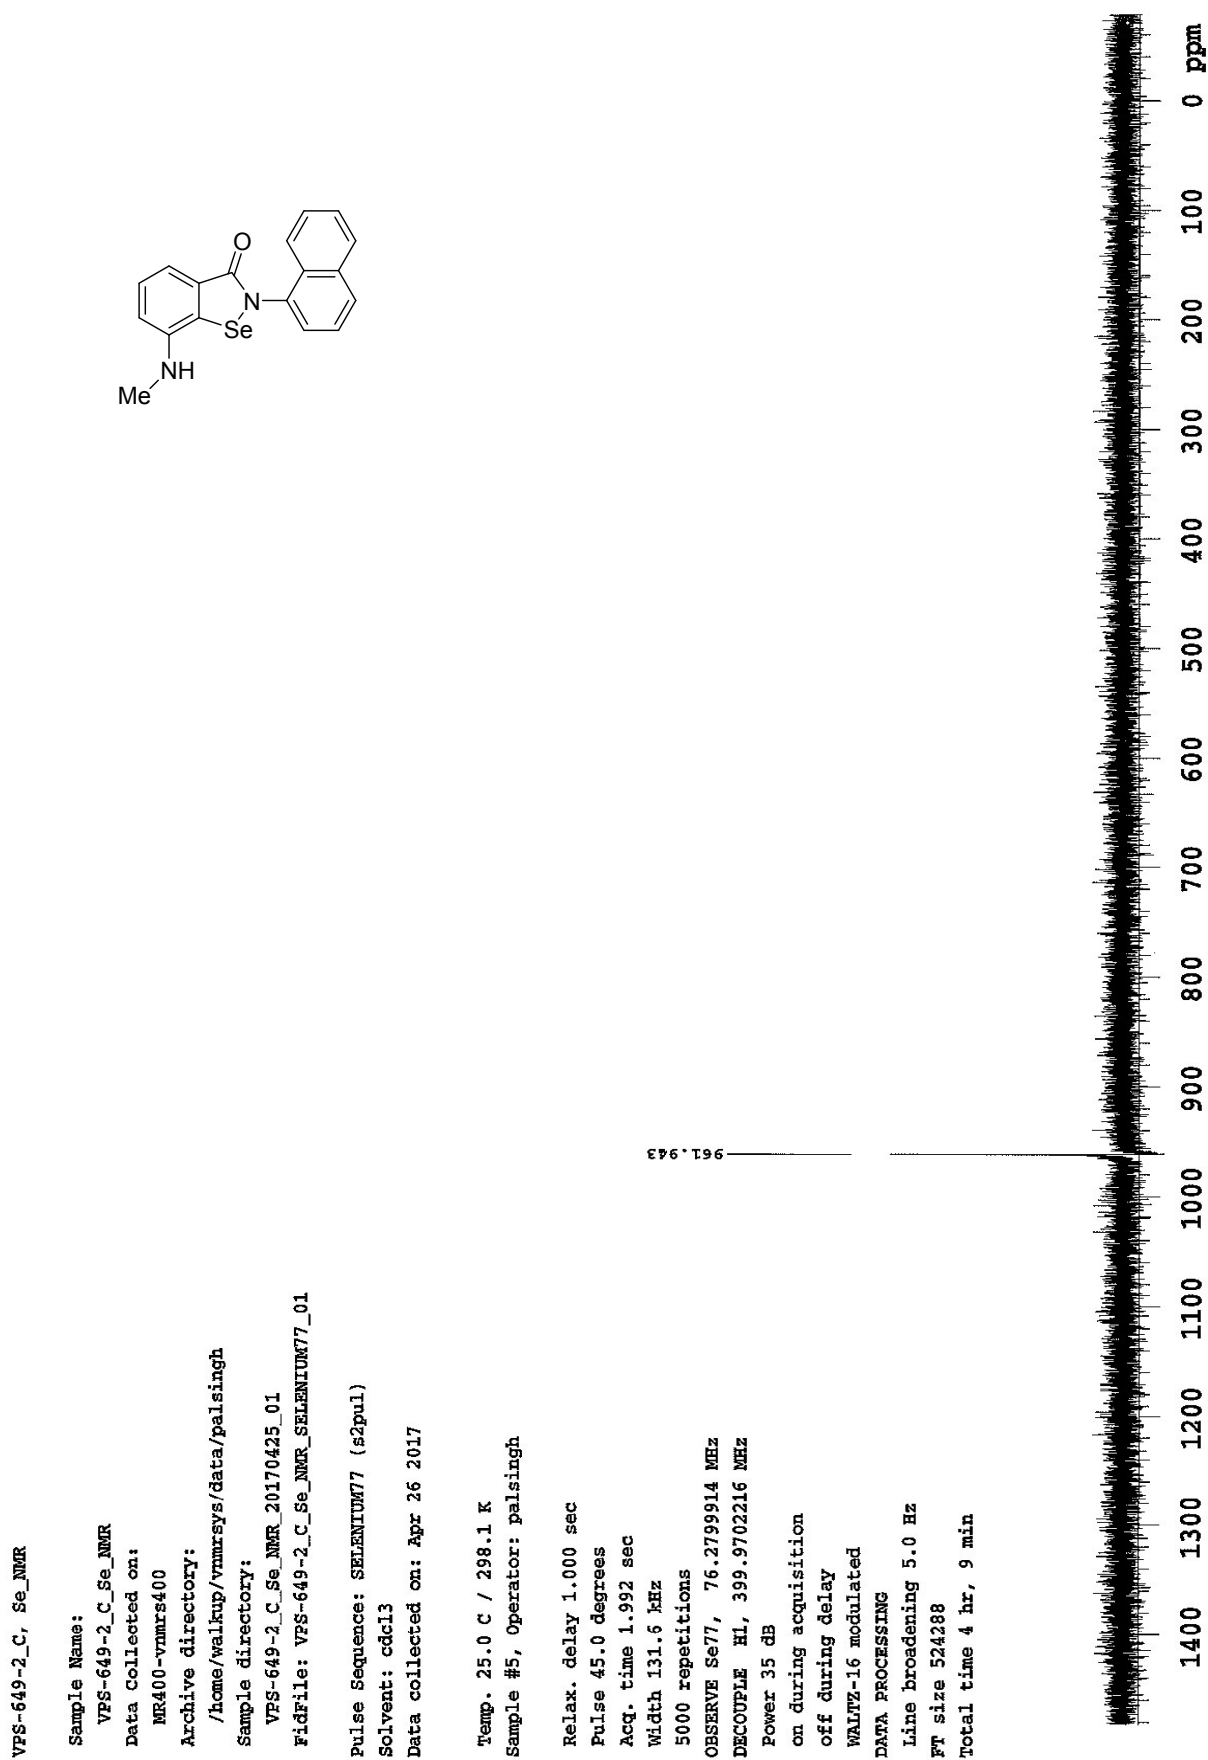

Figure S27. HRMS of 6d

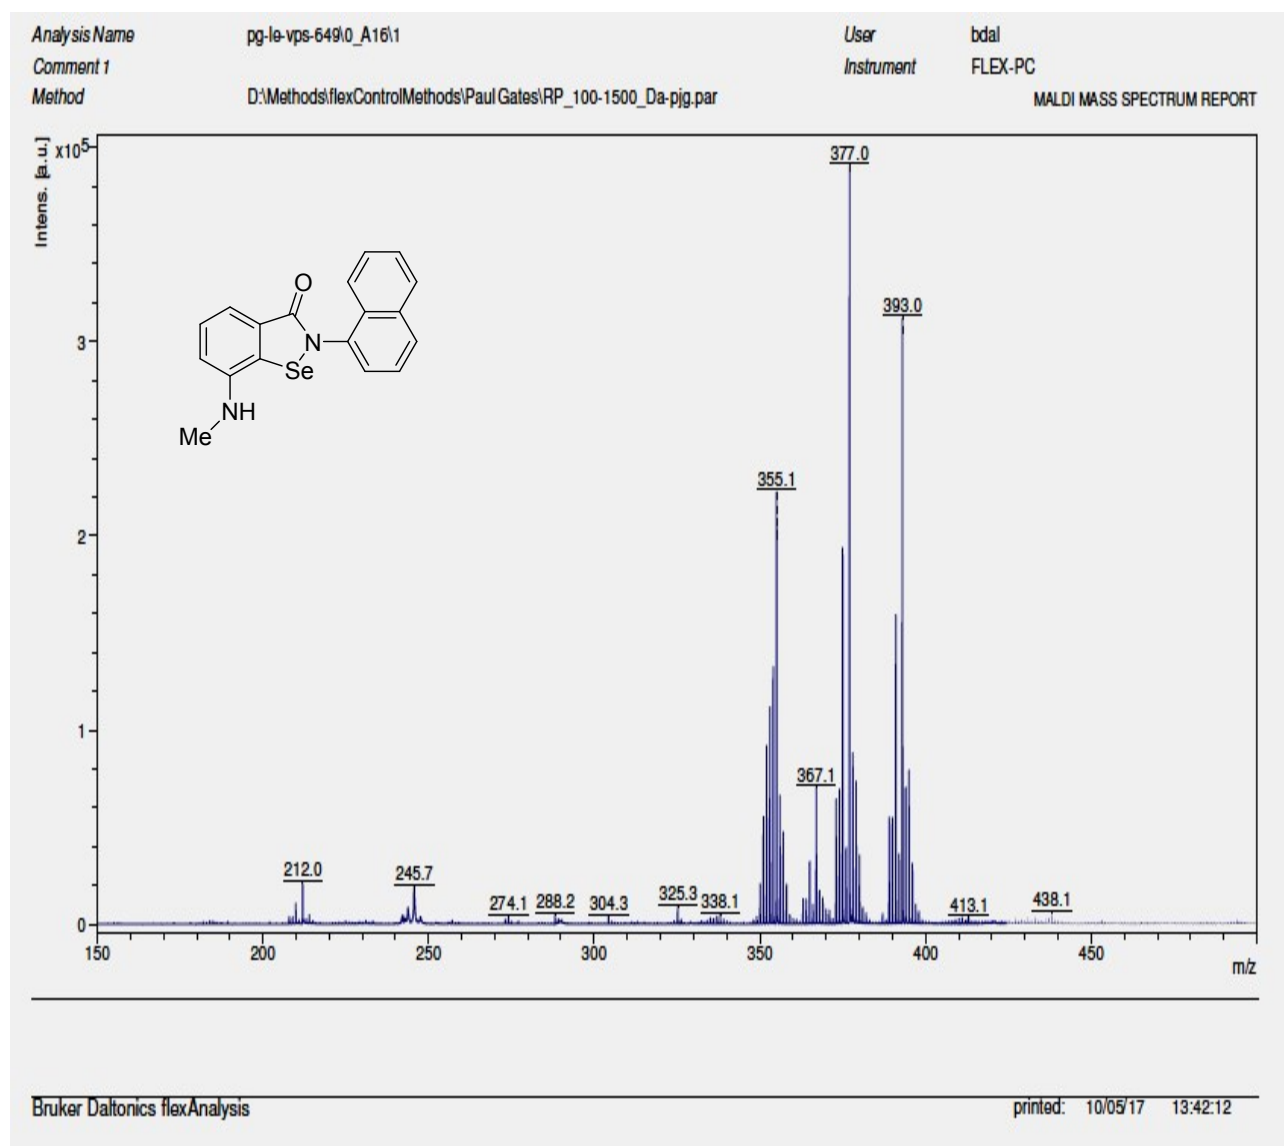

Figure S28. Expansion of the HRMS of 6d

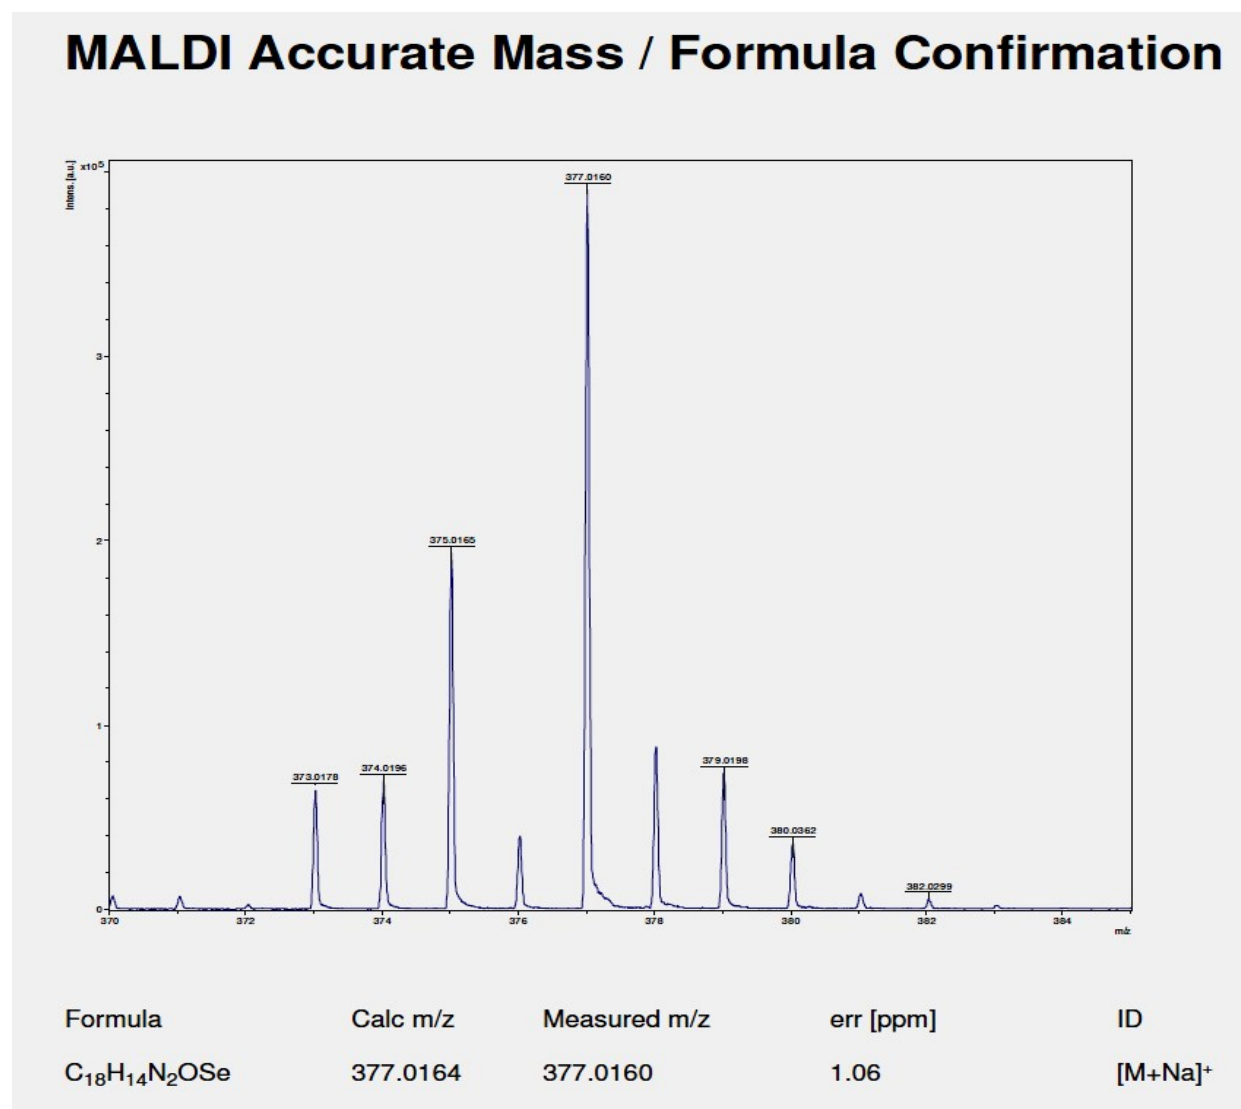

# Mechanistic Studies for the compound **6a** using the $^{77}\text{Se}$ NMR spectroscopy

Figure S29.  $^{77}\text{Se}$  NMR spectrum of **6a** recorded in  $\text{DMSO-d}_6$

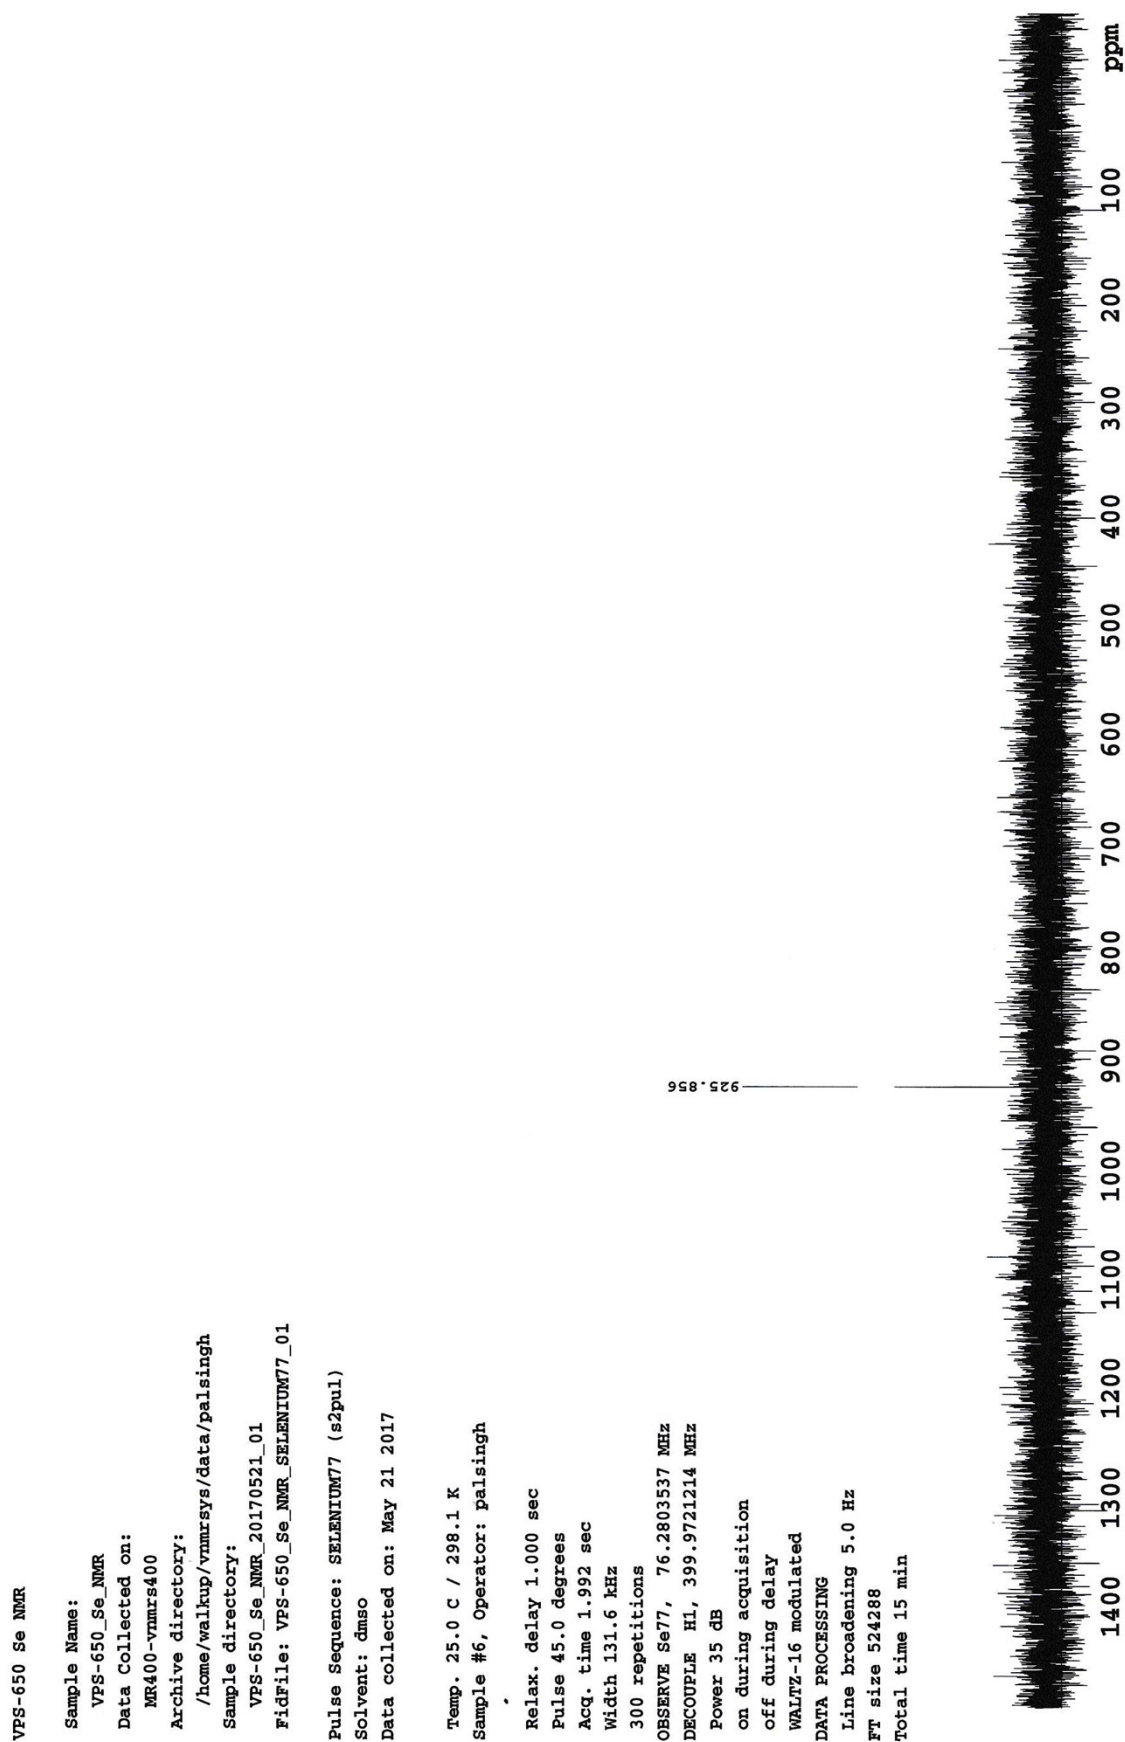

Figure S30. <sup>77</sup>Se NMR spectrum of **6a** recorded after the addition of 2 equiv H<sub>2</sub>O<sub>2</sub>

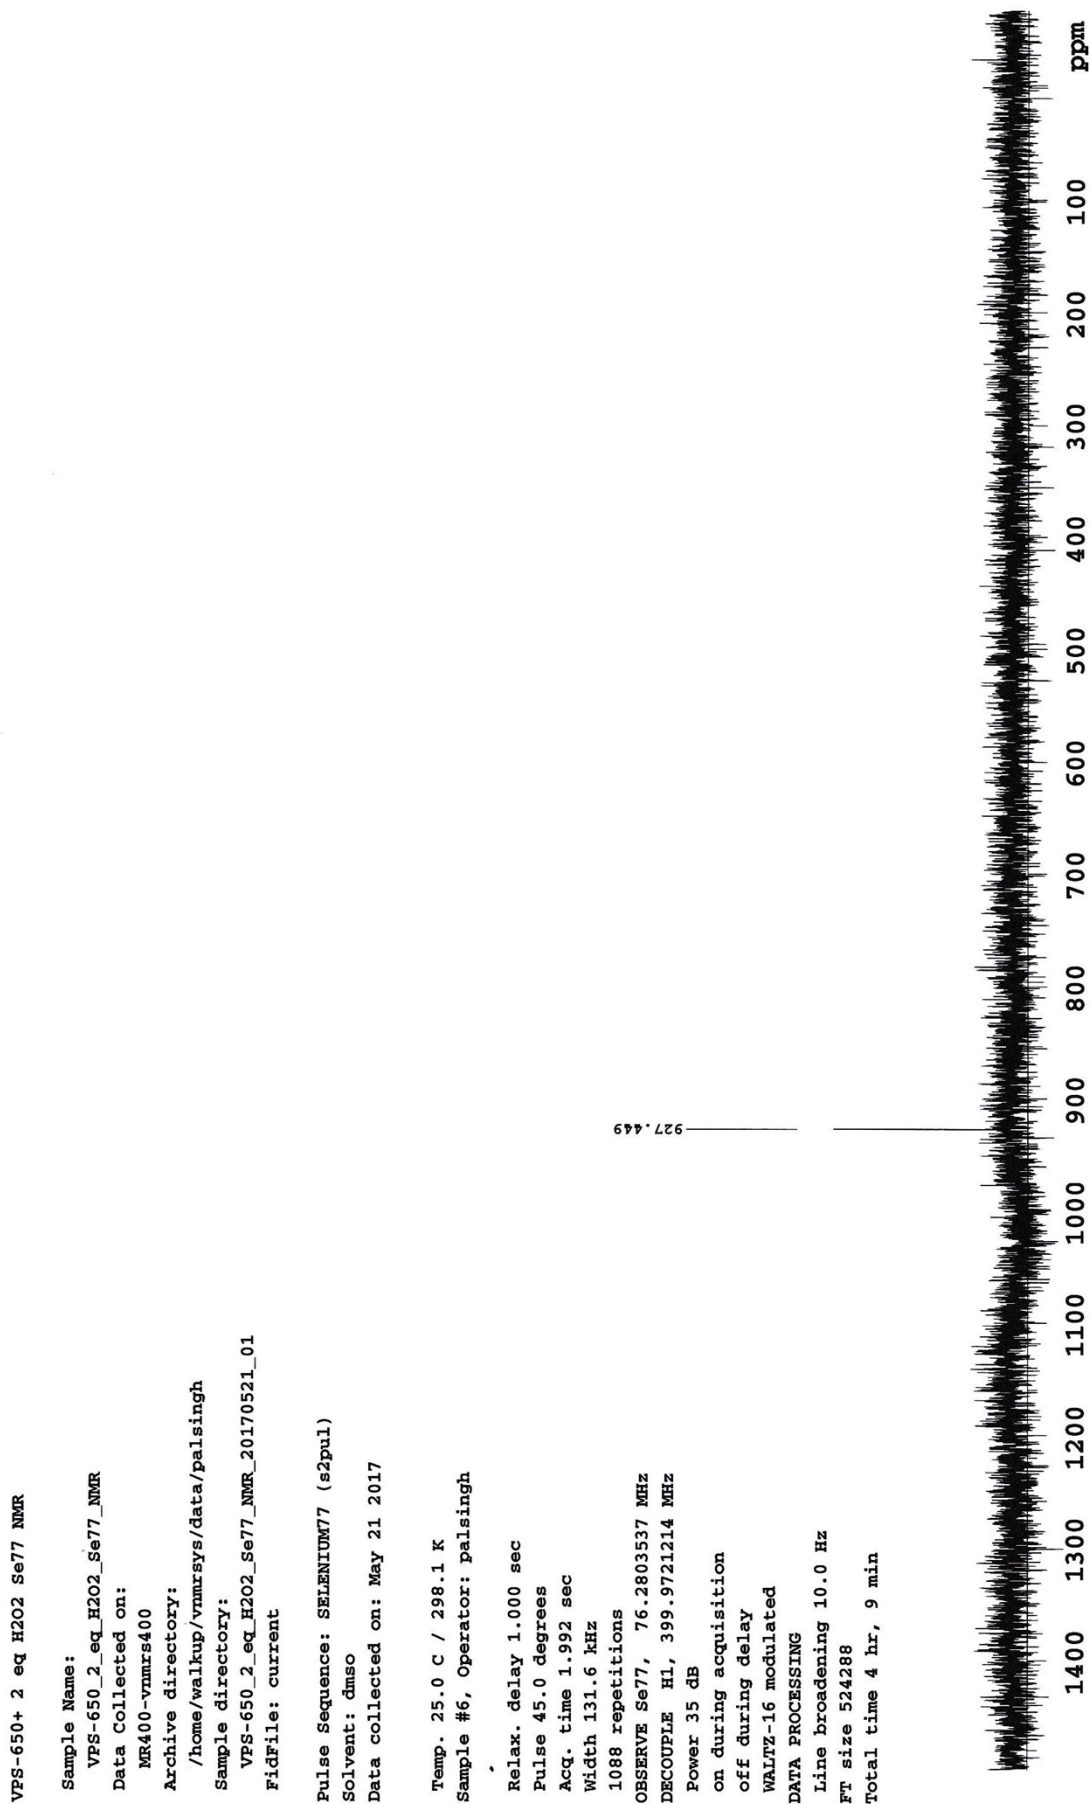



Figure S31. <sup>77</sup>Se NMR spectrum of **6a** recorded after the addition of 4 equiv H<sub>2</sub>O<sub>2</sub>

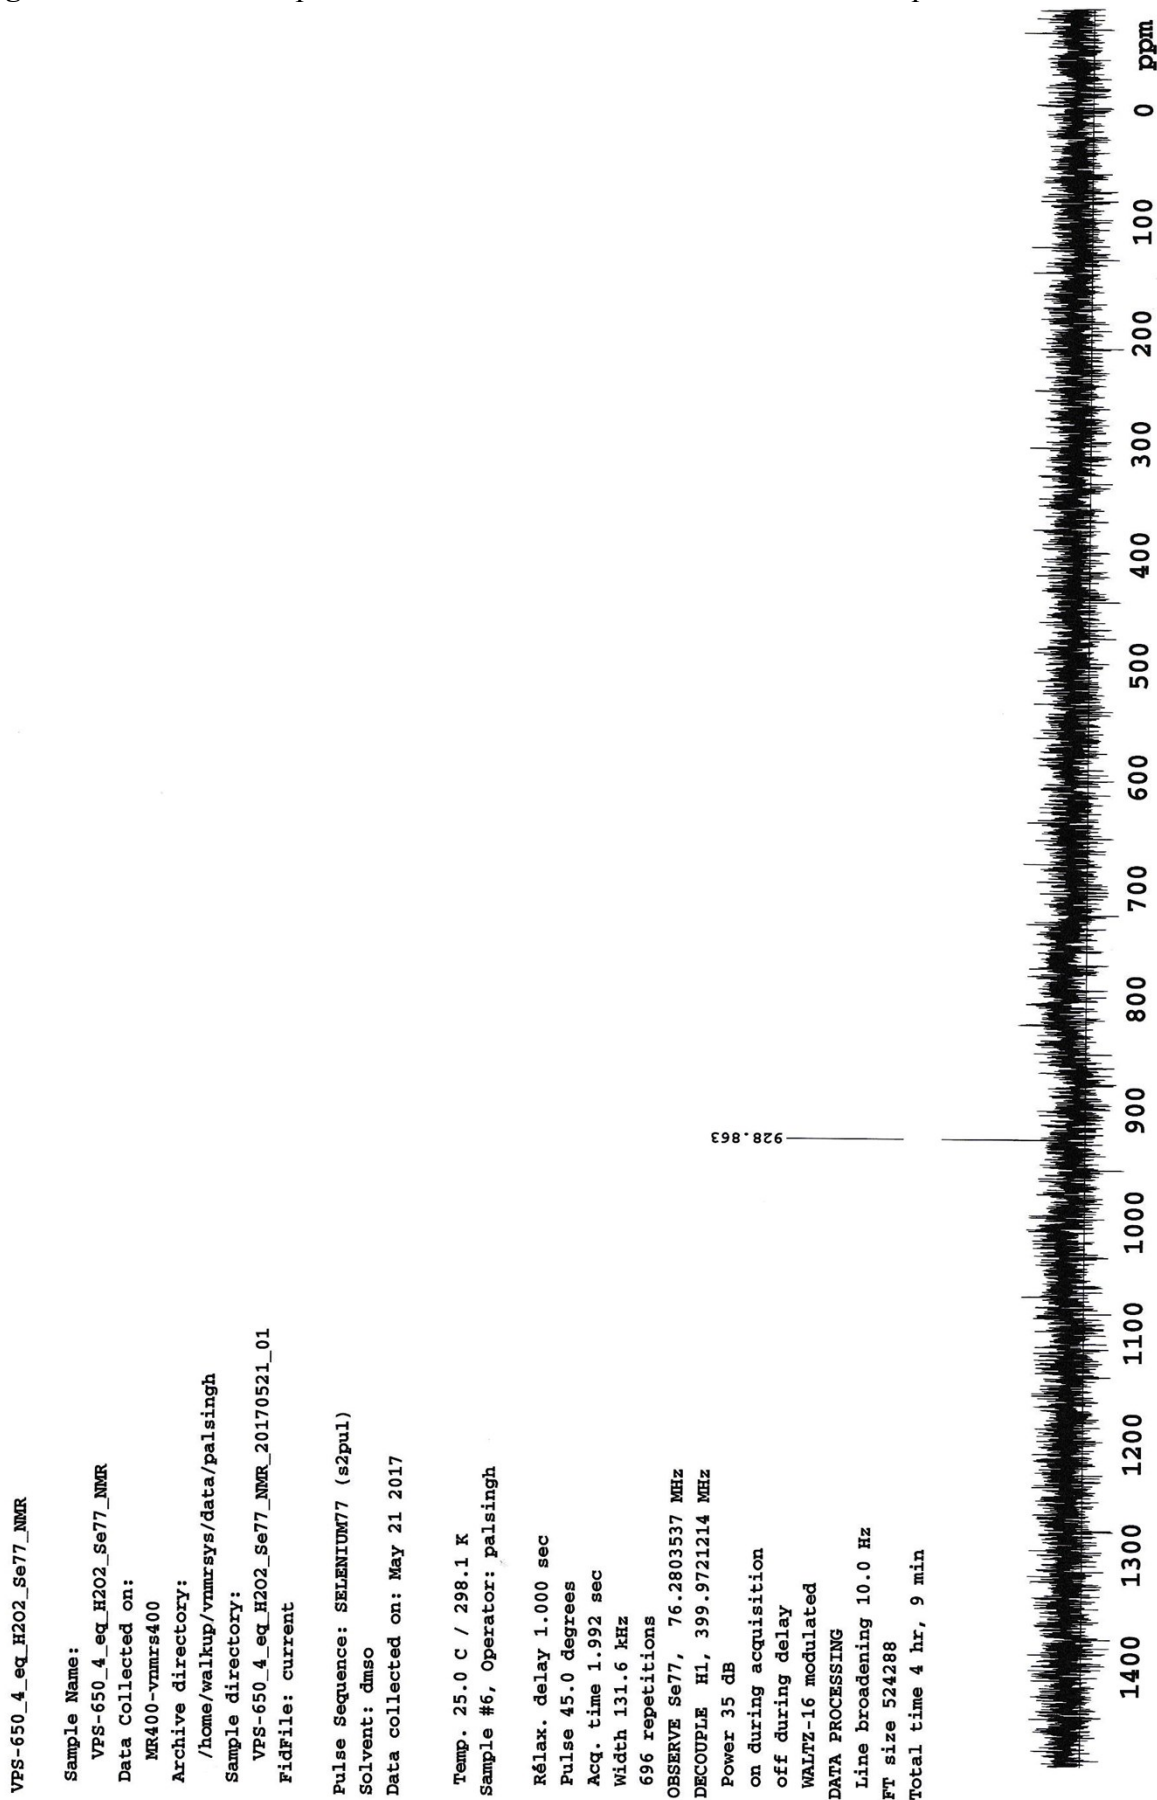

**Figure S32.**  $^{77}\text{Se}$  NMR spectrum of **6a** recorded after the addition of (4 + 3) equiv of  $\text{H}_2\text{O}_2$  + 3 equiv of PhSH

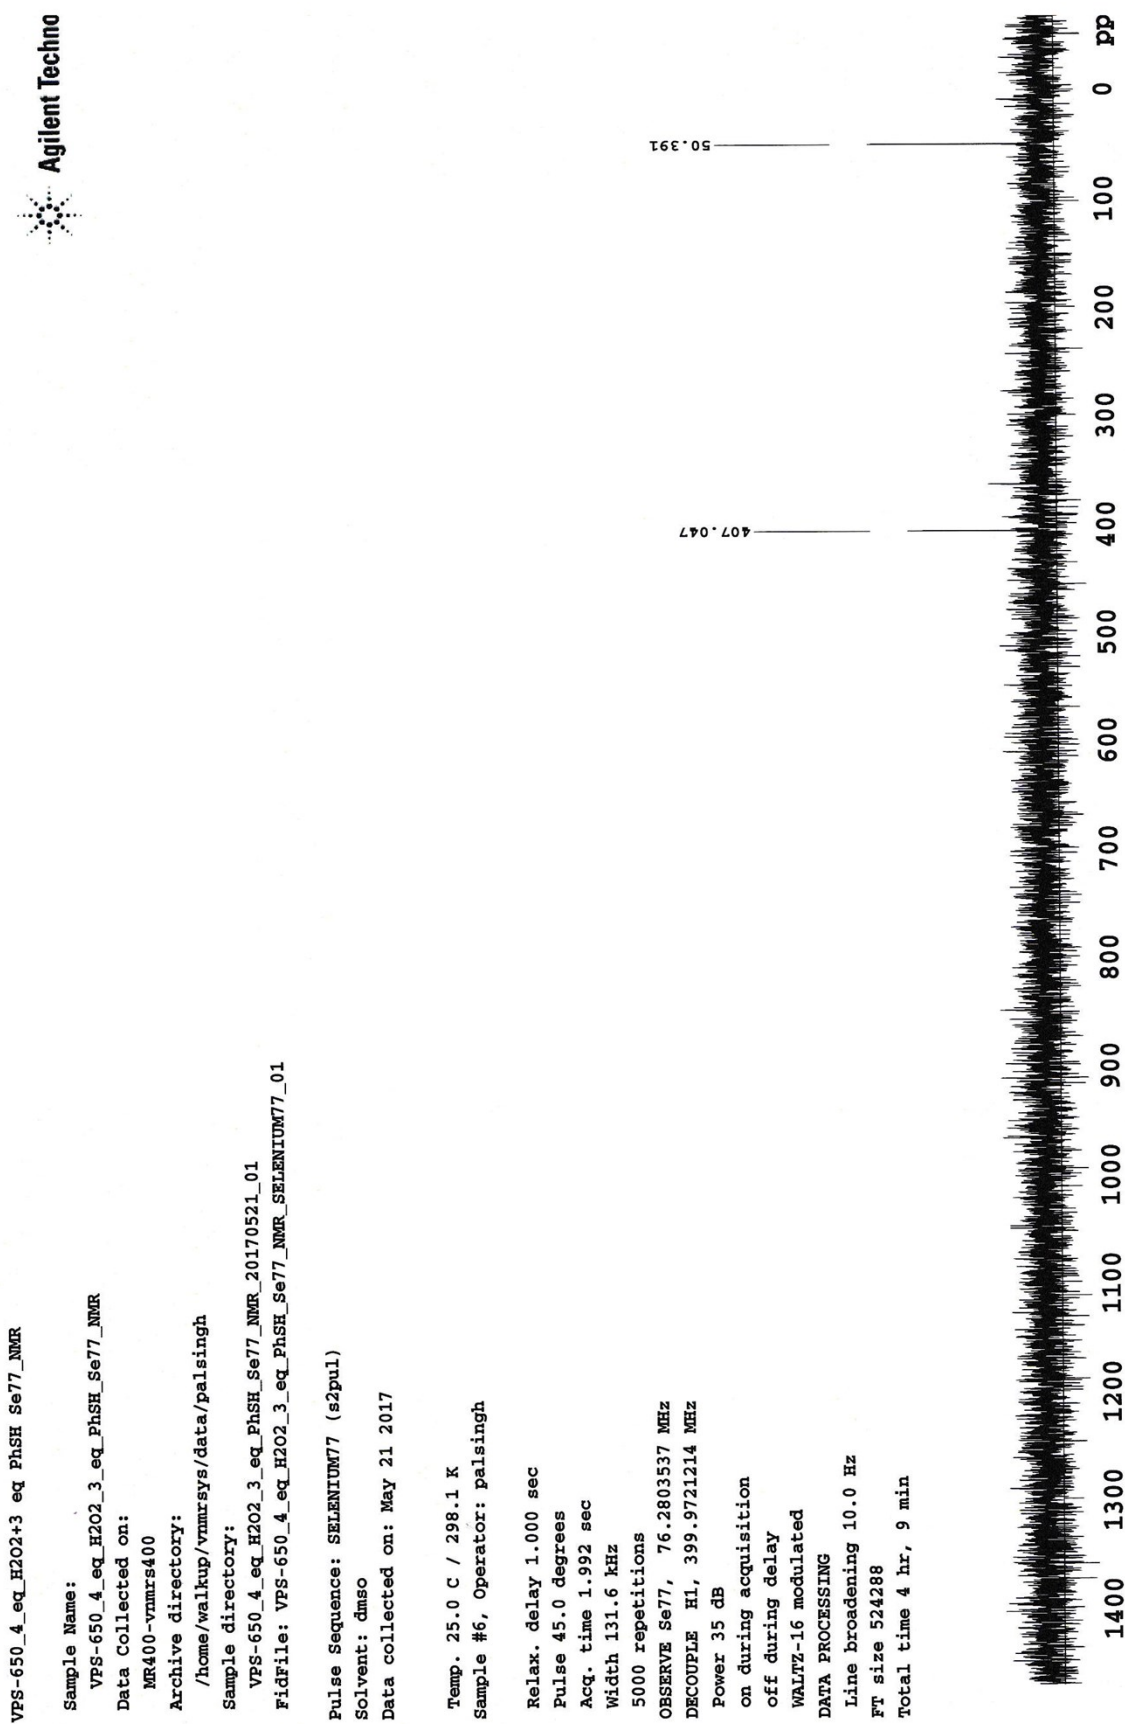

**Figure S33.**  $^{77}\text{Se}$  NMR spectrum of **6a** recorded after the addition of 4 equiv  $\text{H}_2\text{O}_2$  + (3+3) equiv PhSH

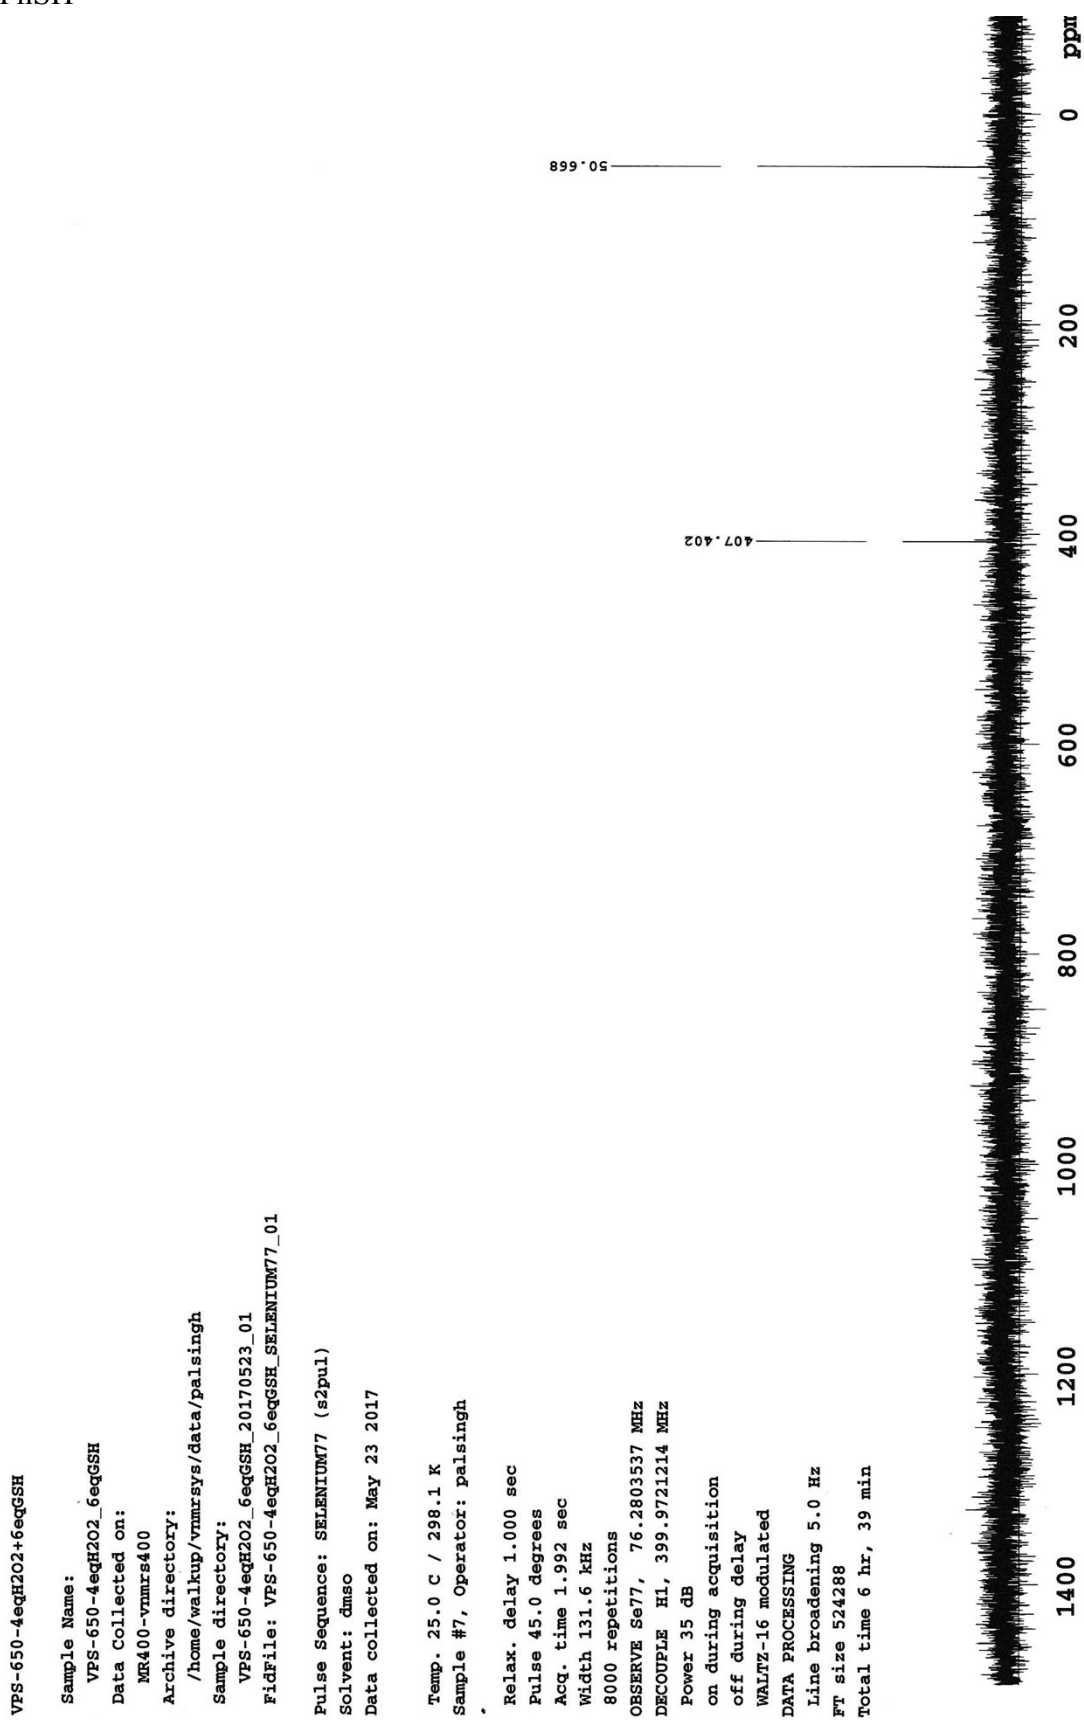

**Figure S34.**  $^{77}\text{Se}$  NMR spectrum of **6a** recorded after the addition of 4 equiv  $\text{H}_2\text{O}_2$  + 6 equiv PhSH + 6 equiv  $\text{H}_2\text{O}_2$

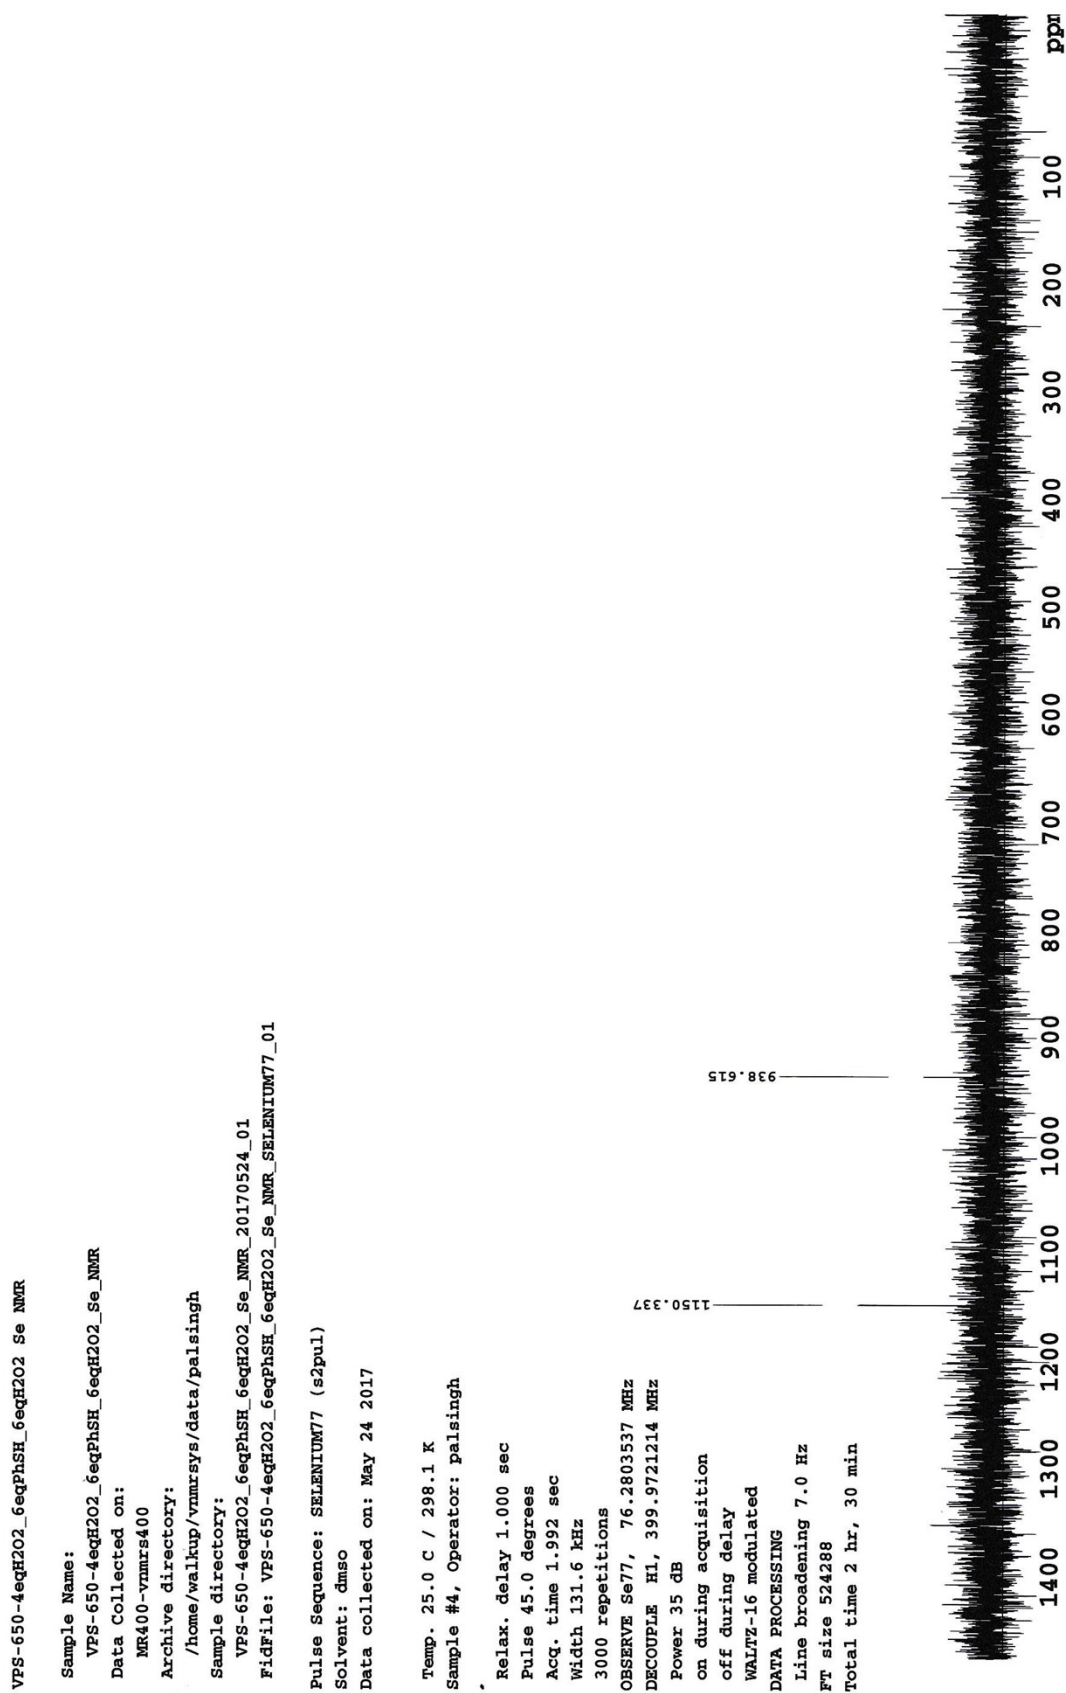

**Scheme S1.** Proposed mechanism for the formation of **6a**

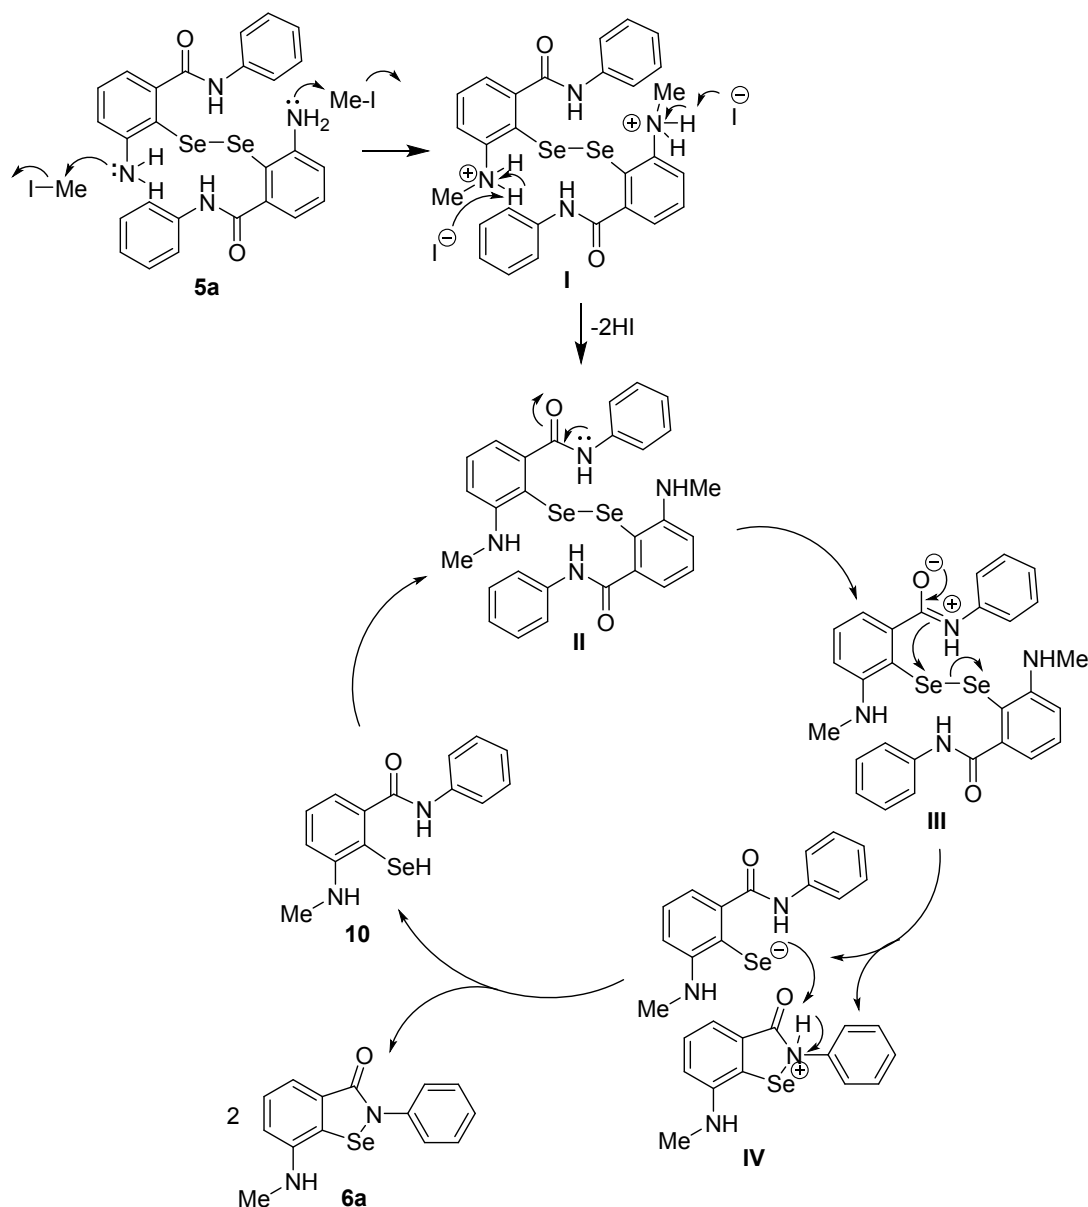

In the reaction, we observed that the primary amine group (-NH<sub>2</sub>) in diselenide **5a** acted as nucleophile towards MeI and led to the formation of the methylated intermediate **I** first *via* the S<sub>N</sub>2 reaction (Scheme S1). Further, -NHMe group cannot be methylated in **I** with another MeI. Since, the S<sub>N</sub>2 reaction does not take place as d-orbitals of the Se atom interact with the nearby lone pair of electrons on the N-atom in -NHMe group. Since diselenides are dimeric molecules, each equivalent should lead to the formation of **6a** (2 equiv). It is therefore indicated that the formation of compound **6a** is observed via the returning of intermediate **10a** to the cycle.

## CheckCIF/PLATON report for compound 6c

---

Structure factors have been supplied for datablock(s) shelx

THIS REPORT IS FOR GUIDANCE ONLY. IF USED AS PART OF A REVIEW PROCEDURE FOR PUBLICATION, IT SHOULD NOT REPLACE THE EXPERTISE OF AN EXPERIENCED CRYSTALLOGRAPHIC REFEREE.

No syntax errors found.  
Please wait while processing ....  
[report](#)  
[Structure factor report](#)

[CIF dictionary](#)  
[Interpreting this](#)

## Datablock: shelx

---

Bond precision: C-C = 0.0101 A Wavelength=0.71073

Cell: a=9.0455(5) b=12.1947(6) c=13.2917(7)  
alpha=101.367(4) beta=90.571(4) gamma=109.919(5)

Temperature: 100 K

|                        | Calculated       | Reported         |
|------------------------|------------------|------------------|
| Volume                 | 1346.68 (13)     | 1346.68 (13)     |
| Space group            | P -1             | P -1             |
| Hall group             | -P 1             | -P 1             |
| Moiety formula         | C15 H14 N2 O2 Se | C15 H14 N2 O2 Se |
| Sum formula            | C15 H14 N2 O2 Se | C15 H14 N2 O2 Se |
| Mr                     | 333.24           | 333.24           |
| Dx, g cm <sup>-3</sup> | 1.644            | 1.644            |
| Z                      | 4                | 4                |
| Mu (mm <sup>-1</sup> ) | 2.791            | 2.791            |
| F000                   | 672.0            | 672.0            |
| F000'                  | 671.88           |                  |
| h, k, lmax             | 13, 17, 19       | 13, 17, 19       |
| Nref                   | 8666             | 7914             |
| Tmin, Tmax             | 0.437, 0.622     | 0.629, 1.000     |

Tmin' 0.417  
Correction method= # Reported T Limits: Tmin=0.629  
Tmax=1.000 AbsCorr = MULTI-SCAN  
Data completeness= 0.913 Theta(max)= 31.101  
R(reflections)= 0.0888( 6632) wR2(reflections)= 0.2492( 7914)  
S = 1.062 Npar= 365

---

The following ALERTS were generated. Each ALERT has the format  
**test-name\_ALERT\_alert-type\_alert-level**.  
Click on the hyperlinks for more details of the test.

---

### ● Alert level B

[PLAT930\\_ALERT\\_2\\_B](#) FCF-based Twin Law ( 2-1 0) [ 1 0 0] Est.d BASF  
0.22 Check

---

### ● Alert level C

[DIFMX02\\_ALERT\\_1\\_C](#) The maximum difference density is > 0.1\*ZMAX\*0.75  
The relevant atom site should be identified.  
[PLAT097\\_ALERT\\_2\\_C](#) Large Reported Max. (Positive) Residual Density  
2.59 eA-3  
[PLAT341\\_ALERT\\_3\\_C](#) Low Bond Precision on C-C Bonds .....  
0.01012 Ang.  
[PLAT480\\_ALERT\\_4\\_C](#) Long H...A H-Bond Reported H15E ..SE2 .  
3.14 Ang.  
[PLAT906\\_ALERT\\_3\\_C](#) Large K Value in the Analysis of Variance .....  
6.825 Check  
[PLAT911\\_ALERT\\_3\\_C](#) Missing FCF Refl Between Thmin & STh/L= 0.600  
27 Report

---

### ● Alert level G

[PLAT003\\_ALERT\\_2\\_G](#) Number of Uiso or Uij Restrained non-H Atoms ...  
40 Report  
[PLAT007\\_ALERT\\_5\\_G](#) Number of Unrefined Donor-H Atoms .....  
2 Report  
[PLAT083\\_ALERT\\_2\\_G](#) SHELXL Second Parameter in WGHT Unusually Large  
34.14 Why ?  
[PLAT186\\_ALERT\\_4\\_G](#) The CIF-Embedded .res File Contains ISOR Records  
2 Report  
[PLAT720\\_ALERT\\_4\\_G](#) Number of Unusual/Non-Standard Labels .....  
14 Note  
[PLAT860\\_ALERT\\_3\\_G](#) Number of Least-Squares Restraints .....  
240 Note  
[PLAT870\\_ALERT\\_4\\_G](#) ALERTS Related to Twinning Effects Suppressed ..  
! Info  
[PLAT883\\_ALERT\\_1\\_G](#) No Info/Value for \_atom\_sites\_solution\_primary .  
Please Do !  
[PLAT910\\_ALERT\\_3\\_G](#) Missing # of FCF Reflection(s) Below Theta(Min).  
1 Note  
[PLAT912\\_ALERT\\_4\\_G](#) Missing # of FCF Reflections Above STh/L= 0.600  
724 Note  
[PLAT931\\_ALERT\\_5\\_G](#) CIFcalcFCF Twin Law ( 2-1 0) Est.d BASF  
0.22 Check  
[PLAT933\\_ALERT\\_2\\_G](#) Number of OMIT Records in Embedded .res File ...  
29 Note

PLAT941\_ALERT\_3\_G Average HKL Measurement Multiplicity .....  
1.0 Low

---

0 **ALERT level A** = Most likely a serious problem - resolve or explain  
1 **ALERT level B** = A potentially serious problem, consider carefully  
6 **ALERT level C** = Check. Ensure it is not caused by an omission or oversight  
13 **ALERT level G** = General information/check it is not something unexpected

2 ALERT type 1 CIF construction/syntax error, inconsistent or missing data  
5 ALERT type 2 Indicator that the structure model may be wrong or deficient  
6 ALERT type 3 Indicator that the structure quality may be low  
5 ALERT type 4 Improvement, methodology, query or suggestion  
2 ALERT type 5 Informative message, check

---

---

It is advisable to attempt to resolve as many as possible of the alerts in all categories. Often the minor alerts point to easily fixed oversights, errors and omissions in your CIF or refinement strategy, so attention to these fine details can be worthwhile. In order to resolve some of the more serious problems it may be necessary to carry out additional measurements or structure refinements. However, the purpose of your study may justify the reported deviations and the more serious of these should normally be commented upon in the discussion or experimental section of a paper or in the "special\_details" fields of the CIF. checkCIF was carefully designed to identify outliers and unusual parameters, but every test has its limitations and alerts that are not important in a particular case may appear. Conversely, the absence of alerts does not guarantee there are no aspects of the results needing attention. It is up to the individual to critically assess their own results and, if necessary, seek expert advice.

#### **Publication of your CIF in IUCr journals**

A basic structural check has been run on your CIF. These basic checks will be run on all CIFs submitted for publication in IUCr journals (*Acta Crystallographica*, *Journal of Applied Crystallography*, *Journal of Synchrotron Radiation*); however, if you intend to submit to *Acta Crystallographica Section C* or *E* or *IUCrData*, you should make sure that [full publication checks](#) are run on the final version of your CIF prior to submission.

#### **Publication of your CIF in other journals**

Please refer to the *Notes for Authors* of the relevant journal for any special instructions relating to CIF submission.

---

PLATON version of 10/08/2020; check.def file version of 06/08/2020

## **Datablock shelx - ellipsoid plot**



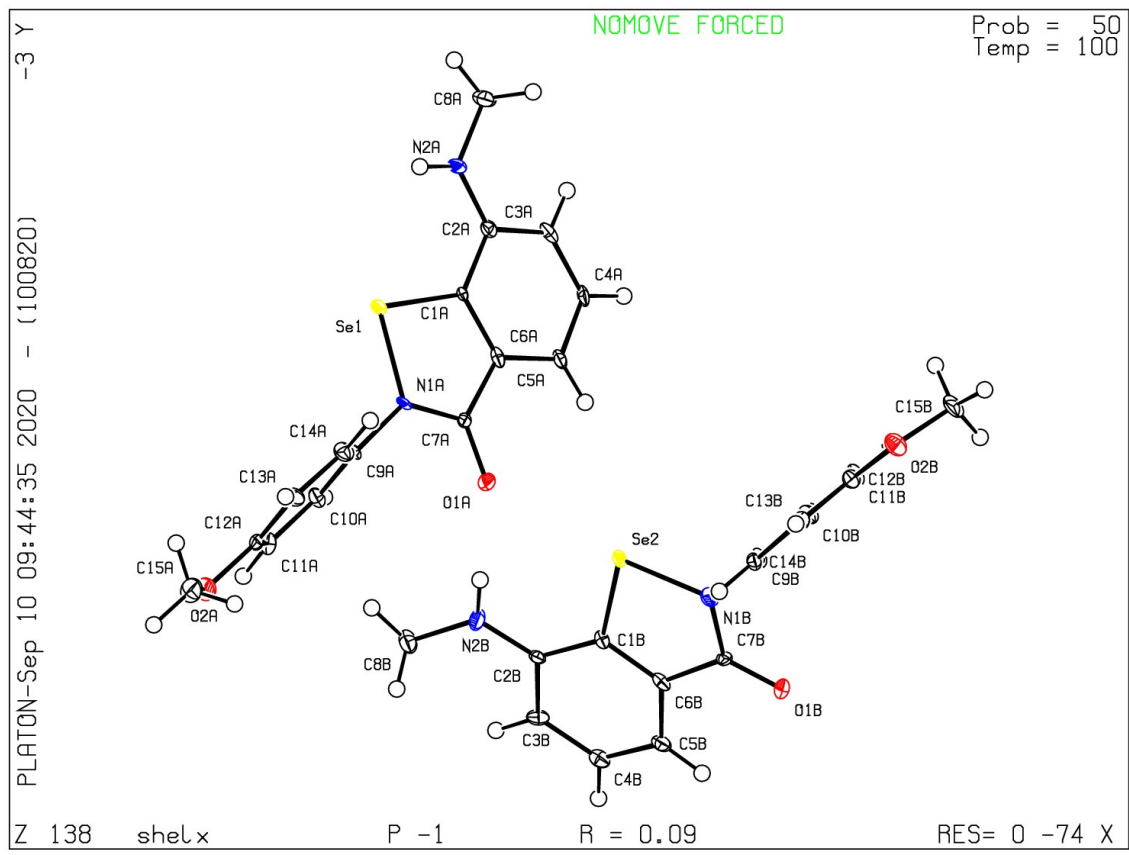

Crystal data and structure refinement for compound **6c**

Identification code

shelx

|                                   |                                             |                               |
|-----------------------------------|---------------------------------------------|-------------------------------|
| Empirical formula                 | C15 H14 N2 O2 Se                            |                               |
| Formula weight                    | 333.24                                      |                               |
| Temperature                       | 100(2) K                                    |                               |
| Wavelength                        | 0.71073 Å                                   |                               |
| Crystal system                    | Triclinic                                   |                               |
| Space group                       | P -1                                        |                               |
| Unit cell dimensions              | a = 9.0455(5) Å                             | $\alpha = 101.367(4)^\circ$ . |
|                                   | b = 12.1947(6) Å                            | $\beta = 90.571(4)^\circ$ .   |
|                                   | c = 13.2917(7) Å                            | $\gamma = 109.919(5)^\circ$ . |
| Volume                            | 1346.68(13) Å <sup>3</sup>                  |                               |
| Z                                 | 4                                           |                               |
| Density (calculated)              | 1.644 Mg/m <sup>3</sup>                     |                               |
| Absorption coefficient            | 2.791 mm <sup>-1</sup>                      |                               |
| F(000)                            | 672                                         |                               |
| Crystal size                      | 0.31 x 0.25 x 0.17 mm <sup>3</sup>          |                               |
| Theta range for data collection   | 1.818 to 31.101°.                           |                               |
| Index ranges                      | -12 ≤ h ≤ 13, -17 ≤ k ≤ 17, -19 ≤ l ≤ 19    |                               |
| Reflections collected             | 7914                                        |                               |
| Independent reflections           | 7914 [R(int) = 0.1121]                      |                               |
| Completeness to theta = 25.500°   | 99.4 %                                      |                               |
| Absorption correction             | Semi-empirical from equivalents             |                               |
| Max. and min. transmission        | 1.00000 and 0.62889                         |                               |
| Refinement method                 | Full-matrix least-squares on F <sup>2</sup> |                               |
| Data / restraints / parameters    | 7914 / 240 / 365                            |                               |
| Goodness-of-fit on F <sup>2</sup> | 1.062                                       |                               |
| Final R indices [I > 2σ(I)]       | R1 = 0.0888, wR2 = 0.2418                   |                               |
| R indices (all data)              | R1 = 0.1014, wR2 = 0.2492                   |                               |
| Extinction coefficient            | n/a                                         |                               |
| Largest diff. peak and hole       | 2.589 and -2.537 e.Å <sup>-3</sup>          |                               |

Atomic coordinates ( $\times 10^4$ ) and equivalent isotropic displacement parameters ( $\text{\AA}^2 \times 10^3$ ) for compound **6c**.  $U(\text{eq})$  is defined as one third of the trace of the orthogonalized  $U^{ij}$  tensor.

|        | x        | y       | z        | U(eq) |
|--------|----------|---------|----------|-------|
| Se(1)  | 3864(1)  | 2720(1) | 9460(1)  | 10(1) |
| O(1A)  | 4428(6)  | 2346(5) | 6495(4)  | 14(1) |
| O(2A)  | 11374(6) | 5031(5) | 8649(4)  | 18(1) |
| N(1A)  | 4857(6)  | 2881(5) | 8237(4)  | 10(1) |
| N(2A)  | 220(7)   | 1509(6) | 9928(5)  | 15(1) |
| C(1A)  | 2018(7)  | 1817(6) | 8593(5)  | 8(1)  |
| C(2A)  | 500(8)   | 1292(6) | 8911(5)  | 11(1) |
| C(3A)  | -671(8)  | 576(6)  | 8129(6)  | 13(1) |
| C(4A)  | -396(8)  | 441(6)  | 7103(5)  | 12(1) |
| C(5A)  | 1072(8)  | 1024(6) | 6791(5)  | 12(1) |
| C(6A)  | 2285(8)  | 1696(6) | 7558(5)  | 11(1) |
| C(7A)  | 3922(7)  | 2321(6) | 7353(5)  | 9(1)  |
| C(8A)  | -1342(9) | 980(7)  | 10262(6) | 18(1) |
| C(9A)  | 6520(7)  | 3462(6) | 8322(5)  | 8(1)  |
| C(10A) | 7486(8)  | 2796(6) | 8035(5)  | 13(1) |
| C(11A) | 9100(8)  | 3350(6) | 8137(5)  | 13(1) |
| C(12A) | 9747(8)  | 4571(6) | 8559(5)  | 10(1) |
| C(13A) | 8803(8)  | 5236(6) | 8848(5)  | 14(1) |
| C(14A) | 7175(8)  | 4671(6) | 8721(5)  | 13(1) |
| C(15A) | 12101(9) | 6270(7) | 9069(6)  | 21(2) |
| Se(2)  | 3528(1)  | 2666(1) | 4502(1)  | 10(1) |
| O(1B)  | 2722(6)  | 2548(5) | 1560(4)  | 15(1) |
| O(2B)  | -1212(6) | 5614(5) | 3821(4)  | 17(1) |
| N(1B)  | 2747(7)  | 2947(5) | 3312(5)  | 13(1) |
| N(2B)  | 6115(7)  | 1443(6) | 4903(5)  | 15(1) |
| C(1B)  | 4584(7)  | 1827(6) | 3605(5)  | 10(1) |
| C(2B)  | 5636(7)  | 1314(6) | 3907(5)  | 9(1)  |
| C(3B)  | 6201(8)  | 666(6)  | 3105(5)  | 13(1) |
| C(4B)  | 5774(8)  | 596(6)  | 2067(5)  | 13(1) |
| C(5B)  | 4826(8)  | 1184(6) | 1787(5)  | 13(1) |
| C(6B)  | 4224(7)  | 1806(6) | 2592(5)  | 11(1) |
| C(7B)  | 3169(7)  | 2447(6) | 2400(5)  | 10(1) |
| C(8B)  | 7340(9)  | 1028(7) | 5222(6)  | 17(1) |

|        |          |         |         |       |
|--------|----------|---------|---------|-------|
| C(9B)  | 1696(8)  | 3608(6) | 3422(5) | 12(1) |
| C(10B) | 92(8)    | 3016(6) | 3275(5) | 13(1) |
| C(11B) | -940(8)  | 3655(6) | 3405(6) | 14(1) |
| C(12B) | -327(8)  | 4899(6) | 3701(5) | 12(1) |
| C(13B) | 1310(9)  | 5492(6) | 3875(5) | 14(1) |
| C(14B) | 2317(8)  | 4847(6) | 3728(5) | 12(1) |
| C(15B) | -2862(9) | 5065(7) | 3551(6) | 19(1) |

---

Bond lengths [Å] and angles [°] for compound **6c**

---

|               |           |
|---------------|-----------|
| Se(1)-N(1A)   | 1.876(6)  |
| Se(1)-C(1A)   | 1.881(6)  |
| O(1A)-C(7A)   | 1.235(8)  |
| O(2A)-C(12A)  | 1.379(8)  |
| O(2A)-C(15A)  | 1.417(9)  |
| N(1A)-C(7A)   | 1.354(8)  |
| N(1A)-C(9A)   | 1.420(8)  |
| N(2A)-C(2A)   | 1.368(9)  |
| N(2A)-C(8A)   | 1.454(9)  |
| N(2A)-H(2AA)  | 0.8800    |
| C(1A)-C(6A)   | 1.387(9)  |
| C(1A)-C(2A)   | 1.412(9)  |
| C(2A)-C(3A)   | 1.399(9)  |
| C(3A)-C(4A)   | 1.376(10) |
| C(3A)-H(3AA)  | 0.9500    |
| C(4A)-C(5A)   | 1.387(9)  |
| C(4A)-H(4AA)  | 0.9500    |
| C(5A)-C(6A)   | 1.396(9)  |
| C(5A)-H(5AA)  | 0.9500    |
| C(6A)-C(7A)   | 1.472(9)  |
| C(8A)-H(8AA)  | 0.9800    |
| C(8A)-H(8AB)  | 0.9800    |
| C(8A)-H(8AC)  | 0.9800    |
| C(9A)-C(14A)  | 1.377(9)  |
| C(9A)-C(10A)  | 1.392(9)  |
| C(10A)-C(11A) | 1.376(9)  |
| C(10A)-H(10A) | 0.9500    |
| C(11A)-C(12A) | 1.394(9)  |
| C(11A)-H(11A) | 0.9500    |
| C(12A)-C(13A) | 1.375(9)  |
| C(13A)-C(14A) | 1.389(10) |
| C(13A)-H(13A) | 0.9500    |
| C(14A)-H(14A) | 0.9500    |
| C(15A)-H(15A) | 0.9800    |
| C(15A)-H(15B) | 0.9800    |
| C(15A)-H(15C) | 0.9800    |

|               |           |
|---------------|-----------|
| Se(2)-N(1B)   | 1.863(6)  |
| Se(2)-C(1B)   | 1.894(6)  |
| O(1B)-C(7B)   | 1.226(8)  |
| O(2B)-C(12B)  | 1.360(8)  |
| O(2B)-C(15B)  | 1.421(9)  |
| N(1B)-C(7B)   | 1.365(8)  |
| N(1B)-C(9B)   | 1.433(8)  |
| N(2B)-C(2B)   | 1.351(9)  |
| N(2B)-C(8B)   | 1.457(9)  |
| N(2B)-H(2BA)  | 0.8800    |
| C(1B)-C(6B)   | 1.375(9)  |
| C(1B)-C(2B)   | 1.399(9)  |
| C(2B)-C(3B)   | 1.406(9)  |
| C(3B)-C(4B)   | 1.407(10) |
| C(3B)-H(3BA)  | 0.9500    |
| C(4B)-C(5B)   | 1.381(9)  |
| C(4B)-H(4BA)  | 0.9500    |
| C(5B)-C(6B)   | 1.411(9)  |
| C(5B)-H(5BA)  | 0.9500    |
| C(6B)-C(7B)   | 1.473(9)  |
| C(8B)-H(8BA)  | 0.9800    |
| C(8B)-H(8BB)  | 0.9800    |
| C(8B)-H(8BC)  | 0.9800    |
| C(9B)-C(10B)  | 1.375(9)  |
| C(9B)-C(14B)  | 1.392(9)  |
| C(10B)-C(11B) | 1.398(9)  |
| C(10B)-H(10B) | 0.9500    |
| C(11B)-C(12B) | 1.396(9)  |
| C(11B)-H(11B) | 0.9500    |
| C(12B)-C(13B) | 1.403(10) |
| C(13B)-C(14B) | 1.385(9)  |
| C(13B)-H(13B) | 0.9500    |
| C(14B)-H(14B) | 0.9500    |
| C(15B)-H(15D) | 0.9800    |
| C(15B)-H(15E) | 0.9800    |
| C(15B)-H(15F) | 0.9800    |

|                     |          |
|---------------------|----------|
| N(1A)-Se(1)-C(1A)   | 85.5(3)  |
| C(12A)-O(2A)-C(15A) | 117.2(6) |
| C(7A)-N(1A)-C(9A)   | 126.2(5) |
| C(7A)-N(1A)-Se(1)   | 115.8(4) |
| C(9A)-N(1A)-Se(1)   | 117.7(4) |
| C(2A)-N(2A)-C(8A)   | 121.1(6) |
| C(2A)-N(2A)-H(2AA)  | 119.4    |
| C(8A)-N(2A)-H(2AA)  | 119.4    |
| C(6A)-C(1A)-C(2A)   | 121.3(6) |
| C(6A)-C(1A)-Se(1)   | 112.5(5) |
| C(2A)-C(1A)-Se(1)   | 126.2(5) |
| N(2A)-C(2A)-C(3A)   | 123.3(6) |
| N(2A)-C(2A)-C(1A)   | 120.7(6) |
| C(3A)-C(2A)-C(1A)   | 116.0(6) |
| C(4A)-C(3A)-C(2A)   | 122.4(6) |
| C(4A)-C(3A)-H(3AA)  | 118.8    |
| C(2A)-C(3A)-H(3AA)  | 118.8    |
| C(3A)-C(4A)-C(5A)   | 121.2(6) |
| C(3A)-C(4A)-H(4AA)  | 119.4    |
| C(5A)-C(4A)-H(4AA)  | 119.4    |
| C(4A)-C(5A)-C(6A)   | 117.5(6) |
| C(4A)-C(5A)-H(5AA)  | 121.2    |
| C(6A)-C(5A)-H(5AA)  | 121.2    |
| C(1A)-C(6A)-C(5A)   | 121.3(6) |
| C(1A)-C(6A)-C(7A)   | 114.6(6) |
| C(5A)-C(6A)-C(7A)   | 124.1(6) |
| O(1A)-C(7A)-N(1A)   | 122.4(6) |
| O(1A)-C(7A)-C(6A)   | 125.9(6) |
| N(1A)-C(7A)-C(6A)   | 111.6(5) |
| N(2A)-C(8A)-H(8AA)  | 109.5    |
| N(2A)-C(8A)-H(8AB)  | 109.5    |
| H(8AA)-C(8A)-H(8AB) | 109.5    |
| N(2A)-C(8A)-H(8AC)  | 109.5    |
| H(8AA)-C(8A)-H(8AC) | 109.5    |
| H(8AB)-C(8A)-H(8AC) | 109.5    |
| C(14A)-C(9A)-C(10A) | 120.2(6) |
| C(14A)-C(9A)-N(1A)  | 120.1(6) |
| C(10A)-C(9A)-N(1A)  | 119.6(6) |

|                      |          |
|----------------------|----------|
| C(11A)-C(10A)-C(9A)  | 119.9(6) |
| C(11A)-C(10A)-H(10A) | 120.1    |
| C(9A)-C(10A)-H(10A)  | 120.1    |
| C(10A)-C(11A)-C(12A) | 119.3(6) |
| C(10A)-C(11A)-H(11A) | 120.3    |
| C(12A)-C(11A)-H(11A) | 120.3    |
| C(13A)-C(12A)-O(2A)  | 124.2(6) |
| C(13A)-C(12A)-C(11A) | 121.2(6) |
| O(2A)-C(12A)-C(11A)  | 114.6(6) |
| C(12A)-C(13A)-C(14A) | 118.9(6) |
| C(12A)-C(13A)-H(13A) | 120.5    |
| C(14A)-C(13A)-H(13A) | 120.5    |
| C(9A)-C(14A)-C(13A)  | 120.4(6) |
| C(9A)-C(14A)-H(14A)  | 119.8    |
| C(13A)-C(14A)-H(14A) | 119.8    |
| O(2A)-C(15A)-H(15A)  | 109.5    |
| O(2A)-C(15A)-H(15B)  | 109.5    |
| H(15A)-C(15A)-H(15B) | 109.5    |
| O(2A)-C(15A)-H(15C)  | 109.5    |
| H(15A)-C(15A)-H(15C) | 109.5    |
| H(15B)-C(15A)-H(15C) | 109.5    |
| N(1B)-Se(2)-C(1B)    | 85.6(3)  |
| C(12B)-O(2B)-C(15B)  | 117.6(6) |
| C(7B)-N(1B)-C(9B)    | 125.5(6) |
| C(7B)-N(1B)-Se(2)    | 116.5(4) |
| C(9B)-N(1B)-Se(2)    | 117.9(5) |
| C(2B)-N(2B)-C(8B)    | 123.3(6) |
| C(2B)-N(2B)-H(2BA)   | 118.4    |
| C(8B)-N(2B)-H(2BA)   | 118.4    |
| C(6B)-C(1B)-C(2B)    | 122.9(6) |
| C(6B)-C(1B)-Se(2)    | 111.3(5) |
| C(2B)-C(1B)-Se(2)    | 125.7(5) |
| N(2B)-C(2B)-C(1B)    | 122.8(6) |
| N(2B)-C(2B)-C(3B)    | 121.4(6) |
| C(1B)-C(2B)-C(3B)    | 115.9(6) |
| C(2B)-C(3B)-C(4B)    | 121.1(6) |
| C(2B)-C(3B)-H(3BA)   | 119.4    |
| C(4B)-C(3B)-H(3BA)   | 119.4    |



|                      |          |
|----------------------|----------|
| C(5B)-C(4B)-C(3B)    | 122.0(6) |
| C(5B)-C(4B)-H(4BA)   | 119.0    |
| C(3B)-C(4B)-H(4BA)   | 119.0    |
| C(4B)-C(5B)-C(6B)    | 116.8(6) |
| C(4B)-C(5B)-H(5BA)   | 121.6    |
| C(6B)-C(5B)-H(5BA)   | 121.6    |
| C(1B)-C(6B)-C(5B)    | 121.1(6) |
| C(1B)-C(6B)-C(7B)    | 116.5(6) |
| C(5B)-C(6B)-C(7B)    | 122.4(6) |
| O(1B)-C(7B)-N(1B)    | 123.3(6) |
| O(1B)-C(7B)-C(6B)    | 126.7(6) |
| N(1B)-C(7B)-C(6B)    | 110.0(6) |
| N(2B)-C(8B)-H(8BA)   | 109.5    |
| N(2B)-C(8B)-H(8BB)   | 109.5    |
| H(8BA)-C(8B)-H(8BB)  | 109.5    |
| N(2B)-C(8B)-H(8BC)   | 109.5    |
| H(8BA)-C(8B)-H(8BC)  | 109.5    |
| H(8BB)-C(8B)-H(8BC)  | 109.5    |
| C(10B)-C(9B)-C(14B)  | 120.7(6) |
| C(10B)-C(9B)-N(1B)   | 120.0(6) |
| C(14B)-C(9B)-N(1B)   | 119.2(6) |
| C(9B)-C(10B)-C(11B)  | 120.2(6) |
| C(9B)-C(10B)-H(10B)  | 119.9    |
| C(11B)-C(10B)-H(10B) | 119.9    |
| C(12B)-C(11B)-C(10B) | 119.4(6) |
| C(12B)-C(11B)-H(11B) | 120.3    |
| C(10B)-C(11B)-H(11B) | 120.3    |
| O(2B)-C(12B)-C(11B)  | 124.6(6) |
| O(2B)-C(12B)-C(13B)  | 115.5(6) |
| C(11B)-C(12B)-C(13B) | 119.9(6) |
| C(14B)-C(13B)-C(12B) | 120.0(6) |
| C(14B)-C(13B)-H(13B) | 120.0    |
| C(12B)-C(13B)-H(13B) | 120.0    |
| C(13B)-C(14B)-C(9B)  | 119.7(6) |
| C(13B)-C(14B)-H(14B) | 120.1    |
| C(9B)-C(14B)-H(14B)  | 120.1    |
| O(2B)-C(15B)-H(15D)  | 109.5    |
| O(2B)-C(15B)-H(15E)  | 109.5    |

|                      |       |
|----------------------|-------|
| H(15D)-C(15B)-H(15E) | 109.5 |
| O(2B)-C(15B)-H(15F)  | 109.5 |
| H(15D)-C(15B)-H(15F) | 109.5 |
| H(15E)-C(15B)-H(15F) | 109.5 |

---

Symmetry transformations used to generate equivalent atoms:

Anisotropic displacement parameters ( $\text{\AA}^2 \times 10^3$ ) for compound **6c**. The anisotropic displacement factor exponent takes the form:  $-2\pi^2 [h^2 a^{*2} U^{11} + \dots + 2 h k a^* b^* U^{12}]$

|        | U <sup>11</sup> | U <sup>22</sup> | U <sup>33</sup> | U <sup>23</sup> | U <sup>13</sup> | U <sup>12</sup> |
|--------|-----------------|-----------------|-----------------|-----------------|-----------------|-----------------|
| Se(1)  | 6(1)            | 15(1)           | 9(1)            | 0(1)            | 1(1)            | 3(1)            |
| O(1A)  | 15(2)           | 21(2)           | 9(2)            | 2(2)            | 1(2)            | 10(2)           |
| O(2A)  | 13(2)           | 17(2)           | 19(3)           | 5(2)            | -2(2)           | 0(2)            |
| N(1A)  | 3(2)            | 16(2)           | 10(2)           | 2(2)            | 2(2)            | 2(2)            |
| N(2A)  | 6(2)            | 23(3)           | 12(3)           | 4(2)            | 2(2)            | 1(2)            |
| C(1A)  | 6(2)            | 13(3)           | 8(3)            | 4(2)            | 1(2)            | 6(2)            |
| C(2A)  | 10(3)           | 14(3)           | 12(3)           | 2(2)            | 1(2)            | 7(2)            |
| C(3A)  | 6(3)            | 13(3)           | 22(3)           | 5(2)            | 1(2)            | 4(2)            |
| C(4A)  | 8(3)            | 15(3)           | 12(3)           | -1(2)           | -5(2)           | 5(2)            |
| C(5A)  | 8(3)            | 16(3)           | 12(3)           | -1(2)           | -2(2)           | 7(2)            |
| C(6A)  | 8(3)            | 11(3)           | 14(3)           | 0(2)            | -3(2)           | 5(2)            |
| C(7A)  | 10(3)           | 12(3)           | 7(3)            | 1(2)            | 1(2)            | 8(2)            |
| C(8A)  | 14(3)           | 23(3)           | 19(3)           | 7(3)            | 8(3)            | 9(3)            |
| C(9A)  | 5(2)            | 13(2)           | 9(2)            | 2(2)            | 0(2)            | 5(2)            |
| C(10A) | 9(3)            | 14(3)           | 16(3)           | 4(2)            | 0(2)            | 5(2)            |
| C(11A) | 14(3)           | 12(3)           | 13(3)           | 3(2)            | -3(2)           | 5(2)            |
| C(12A) | 9(3)            | 14(3)           | 10(3)           | 7(2)            | 1(2)            | 4(2)            |
| C(13A) | 11(3)           | 11(3)           | 17(3)           | 3(2)            | 3(2)            | 2(2)            |
| C(14A) | 13(3)           | 14(3)           | 15(3)           | 1(2)            | 2(2)            | 7(2)            |
| C(15A) | 15(3)           | 22(4)           | 19(3)           | 6(3)            | -3(3)           | -3(3)           |
| Se(2)  | 9(1)            | 13(1)           | 9(1)            | 1(1)            | 0(1)            | 7(1)            |
| O(1B)  | 14(2)           | 22(2)           | 10(2)           | 4(2)            | -2(2)           | 8(2)            |
| O(2B)  | 16(2)           | 16(2)           | 23(3)           | 4(2)            | 3(2)            | 10(2)           |
| N(1B)  | 13(3)           | 13(2)           | 15(3)           | 4(2)            | 2(2)            | 8(2)            |
| N(2B)  | 19(3)           | 20(3)           | 9(3)            | 1(2)            | -2(2)           | 12(2)           |
| C(1B)  | 8(3)            | 10(3)           | 12(3)           | 1(2)            | -1(2)           | 4(2)            |
| C(2B)  | 6(2)            | 12(3)           | 9(3)            | 0(2)            | 2(2)            | 3(2)            |
| C(3B)  | 15(3)           | 12(3)           | 13(3)           | 1(2)            | 6(2)            | 7(2)            |
| C(4B)  | 10(3)           | 12(3)           | 16(3)           | 0(2)            | 2(2)            | 3(2)            |
| C(5B)  | 8(3)            | 16(3)           | 13(3)           | 0(2)            | 2(2)            | 3(2)            |
| C(6B)  | 6(3)            | 11(3)           | 16(3)           | 1(2)            | 1(2)            | 3(2)            |
| C(7B)  | 8(2)            | 12(2)           | 6(2)            | 0(2)            | 1(2)            | 2(2)            |
| C(8B)  | 14(3)           | 20(3)           | 19(3)           | 2(3)            | -2(3)           | 9(3)            |

|        |       |       |       |      |       |       |
|--------|-------|-------|-------|------|-------|-------|
| C(9B)  | 10(3) | 14(3) | 15(3) | 3(2) | 0(2)  | 8(2)  |
| C(10B) | 12(3) | 13(3) | 15(3) | 0(2) | 2(2)  | 7(2)  |
| C(11B) | 9(3)  | 15(3) | 20(3) | 4(2) | -1(2) | 5(2)  |
| C(12B) | 14(3) | 13(3) | 13(3) | 3(2) | 2(2)  | 9(2)  |
| C(13B) | 19(3) | 11(3) | 11(3) | 0(2) | 0(2)  | 7(2)  |
| C(14B) | 9(3)  | 16(3) | 9(3)  | 0(2) | -1(2) | 6(2)  |
| C(15B) | 13(3) | 24(4) | 23(4) | 2(3) | 2(3)  | 13(3) |

---

Hydrogen coordinates ( $\times 10^4$ ) and isotropic displacement parameters ( $\text{\AA}^2 \times 10^3$ )  
for compound **6c**.

|        | x     | y    | z     | U(eq) |
|--------|-------|------|-------|-------|
| H(2AA) | 998   | 1976 | 10387 | 18    |
| H(3AA) | -1694 | 167  | 8312  | 16    |
| H(4AA) | -1226 | -61  | 6600  | 14    |
| H(5AA) | 1245  | 968  | 6082  | 14    |
| H(8AA) | -1307 | 1215 | 11013 | 26    |
| H(8AB) | -1682 | 108  | 10055 | 26    |
| H(8AC) | -2089 | 1259 | 9943  | 26    |
| H(10A) | 7032  | 1960 | 7769  | 15    |
| H(11A) | 9765  | 2906 | 7922  | 15    |
| H(13A) | 9257  | 6069 | 9130  | 16    |
| H(14A) | 6509  | 5121 | 8912  | 16    |
| H(15A) | 13250 | 6484 | 9109  | 32    |
| H(15B) | 11765 | 6459 | 9761  | 32    |
| H(15C) | 11789 | 6723 | 8627  | 32    |
| H(2BA) | 5664  | 1795 | 5383  | 18    |
| H(3BA) | 6882  | 268  | 3266  | 16    |
| H(4BA) | 6150  | 130  | 1543  | 16    |
| H(5BA) | 4591  | 1171 | 1085  | 15    |
| H(8BA) | 7529  | 1244 | 5974  | 26    |
| H(8BB) | 8316  | 1402 | 4915  | 26    |
| H(8BC) | 7001  | 159  | 4992  | 26    |
| H(10B) | -317  | 2169 | 3083  | 16    |
| H(11B) | -2048 | 3247 | 3293  | 17    |
| H(13B) | 1729  | 6337 | 4094  | 16    |
| H(14B) | 3427  | 5248 | 3836  | 14    |
| H(15D) | -3336 | 5682 | 3582  | 28    |
| H(15E) | -3339 | 4559 | 4035  | 28    |
| H(15F) | -3050 | 4574 | 2851  | 28    |

Torsion angles [°] for compound **6c**

---

|                            |           |
|----------------------------|-----------|
| C(1A)-Se(1)-N(1A)-C(7A)    | -0.9(5)   |
| C(1A)-Se(1)-N(1A)-C(9A)    | -174.7(5) |
| N(1A)-Se(1)-C(1A)-C(6A)    | 1.5(5)    |
| N(1A)-Se(1)-C(1A)-C(2A)    | -178.8(6) |
| C(8A)-N(2A)-C(2A)-C(3A)    | 0.9(10)   |
| C(8A)-N(2A)-C(2A)-C(1A)    | 179.5(6)  |
| C(6A)-C(1A)-C(2A)-N(2A)    | -173.9(6) |
| Se(1)-C(1A)-C(2A)-N(2A)    | 6.5(9)    |
| C(6A)-C(1A)-C(2A)-C(3A)    | 4.8(9)    |
| Se(1)-C(1A)-C(2A)-C(3A)    | -174.8(5) |
| N(2A)-C(2A)-C(3A)-C(4A)    | 175.0(7)  |
| C(1A)-C(2A)-C(3A)-C(4A)    | -3.7(10)  |
| C(2A)-C(3A)-C(4A)-C(5A)    | -0.5(10)  |
| C(3A)-C(4A)-C(5A)-C(6A)    | 3.7(10)   |
| C(2A)-C(1A)-C(6A)-C(5A)    | -1.8(10)  |
| Se(1)-C(1A)-C(6A)-C(5A)    | 177.9(5)  |
| C(2A)-C(1A)-C(6A)-C(7A)    | 178.5(6)  |
| Se(1)-C(1A)-C(6A)-C(7A)    | -1.8(7)   |
| C(4A)-C(5A)-C(6A)-C(1A)    | -2.6(9)   |
| C(4A)-C(5A)-C(6A)-C(7A)    | 177.1(6)  |
| C(9A)-N(1A)-C(7A)-O(1A)    | -6.2(10)  |
| Se(1)-N(1A)-C(7A)-O(1A)    | -179.3(5) |
| C(9A)-N(1A)-C(7A)-C(6A)    | 173.3(6)  |
| Se(1)-N(1A)-C(7A)-C(6A)    | 0.1(7)    |
| C(1A)-C(6A)-C(7A)-O(1A)    | -179.5(6) |
| C(5A)-C(6A)-C(7A)-O(1A)    | 0.8(10)   |
| C(1A)-C(6A)-C(7A)-N(1A)    | 1.1(8)    |
| C(5A)-C(6A)-C(7A)-N(1A)    | -178.6(6) |
| C(7A)-N(1A)-C(9A)-C(14A)   | 117.0(8)  |
| Se(1)-N(1A)-C(9A)-C(14A)   | -70.0(7)  |
| C(7A)-N(1A)-C(9A)-C(10A)   | -65.4(9)  |
| Se(1)-N(1A)-C(9A)-C(10A)   | 107.6(6)  |
| C(14A)-C(9A)-C(10A)-C(11A) | -1.0(10)  |
| N(1A)-C(9A)-C(10A)-C(11A)  | -178.5(6) |
| C(9A)-C(10A)-C(11A)-C(12A) | 2.1(10)   |
| C(15A)-O(2A)-C(12A)-C(13A) | 0.1(10)   |

|                             |           |
|-----------------------------|-----------|
| C(15A)-O(2A)-C(12A)-C(11A)  | 179.7(6)  |
| C(10A)-C(11A)-C(12A)-C(13A) | -1.9(10)  |
| C(10A)-C(11A)-C(12A)-O(2A)  | 178.5(6)  |
| O(2A)-C(12A)-C(13A)-C(14A)  | -179.9(6) |
| C(11A)-C(12A)-C(13A)-C(14A) | 0.5(10)   |
| C(10A)-C(9A)-C(14A)-C(13A)  | -0.4(10)  |
| N(1A)-C(9A)-C(14A)-C(13A)   | 177.2(6)  |
| C(12A)-C(13A)-C(14A)-C(9A)  | 0.6(10)   |
| C(1B)-Se(2)-N(1B)-C(7B)     | 2.2(5)    |
| C(1B)-Se(2)-N(1B)-C(9B)     | 179.0(5)  |
| N(1B)-Se(2)-C(1B)-C(6B)     | -2.2(5)   |
| N(1B)-Se(2)-C(1B)-C(2B)     | 176.1(6)  |
| C(8B)-N(2B)-C(2B)-C(1B)     | -172.9(7) |
| C(8B)-N(2B)-C(2B)-C(3B)     | 5.8(10)   |
| C(6B)-C(1B)-C(2B)-N(2B)     | 172.9(6)  |
| Se(2)-C(1B)-C(2B)-N(2B)     | -5.3(10)  |
| C(6B)-C(1B)-C(2B)-C(3B)     | -5.9(10)  |
| Se(2)-C(1B)-C(2B)-C(3B)     | 176.0(5)  |
| N(2B)-C(2B)-C(3B)-C(4B)     | -176.0(6) |
| C(1B)-C(2B)-C(3B)-C(4B)     | 2.8(10)   |
| C(2B)-C(3B)-C(4B)-C(5B)     | 2.0(10)   |
| C(3B)-C(4B)-C(5B)-C(6B)     | -3.6(10)  |
| C(2B)-C(1B)-C(6B)-C(5B)     | 4.4(10)   |
| Se(2)-C(1B)-C(6B)-C(5B)     | -177.3(5) |
| C(2B)-C(1B)-C(6B)-C(7B)     | -176.5(6) |
| Se(2)-C(1B)-C(6B)-C(7B)     | 1.9(7)    |
| C(4B)-C(5B)-C(6B)-C(1B)     | 0.6(10)   |
| C(4B)-C(5B)-C(6B)-C(7B)     | -178.5(6) |
| C(9B)-N(1B)-C(7B)-O(1B)     | 2.5(11)   |
| Se(2)-N(1B)-C(7B)-O(1B)     | 179.0(5)  |
| C(9B)-N(1B)-C(7B)-C(6B)     | -178.1(6) |
| Se(2)-N(1B)-C(7B)-C(6B)     | -1.6(7)   |
| C(1B)-C(6B)-C(7B)-O(1B)     | 179.1(6)  |
| C(5B)-C(6B)-C(7B)-O(1B)     | -1.8(11)  |
| C(1B)-C(6B)-C(7B)-N(1B)     | -0.3(8)   |
| C(5B)-C(6B)-C(7B)-N(1B)     | 178.9(6)  |
| C(7B)-N(1B)-C(9B)-C(10B)    | 79.2(9)   |
| Se(2)-N(1B)-C(9B)-C(10B)    | -97.3(7)  |

|                             |           |
|-----------------------------|-----------|
| C(7B)-N(1B)-C(9B)-C(14B)    | -103.9(8) |
| Se(2)-N(1B)-C(9B)-C(14B)    | 79.6(7)   |
| C(14B)-C(9B)-C(10B)-C(11B)  | 1.7(11)   |
| N(1B)-C(9B)-C(10B)-C(11B)   | 178.5(6)  |
| C(9B)-C(10B)-C(11B)-C(12B)  | -0.9(11)  |
| C(15B)-O(2B)-C(12B)-C(11B)  | -5.0(10)  |
| C(15B)-O(2B)-C(12B)-C(13B)  | 173.7(6)  |
| C(10B)-C(11B)-C(12B)-O(2B)  | 177.9(7)  |
| C(10B)-C(11B)-C(12B)-C(13B) | -0.7(11)  |
| O(2B)-C(12B)-C(13B)-C(14B)  | -177.1(6) |
| C(11B)-C(12B)-C(13B)-C(14B) | 1.6(10)   |
| C(12B)-C(13B)-C(14B)-C(9B)  | -0.9(10)  |
| C(10B)-C(9B)-C(14B)-C(13B)  | -0.7(10)  |
| N(1B)-C(9B)-C(14B)-C(13B)   | -177.5(6) |

---

Symmetry transformations used to generate equivalent atoms:



Hydrogen bonds for compound **6c** [ $\text{\AA}$  and  $^\circ$ ]

| D-H...A                 | d(D-H) | d(H...A) | d(D...A)  | $\angle(\text{DHA})$ |
|-------------------------|--------|----------|-----------|----------------------|
| N(2A)-H(2AA)...Se(1)    | 0.88   | 2.82     | 3.243(6)  | 111.0                |
| N(2A)-H(2AA)...O(1B)#1  | 0.88   | 2.03     | 2.881(8)  | 161.7                |
| C(15A)-H(15A)...Se(1)#2 | 0.98   | 2.97     | 3.809(8)  | 144.3                |
| N(2B)-H(2BA)...O(1A)    | 0.88   | 2.01     | 2.883(8)  | 171.2                |
| N(2B)-H(2BA)...Se(2)    | 0.88   | 2.84     | 3.263(6)  | 111.1                |
| C(15B)-H(15D)...Se(2)#3 | 0.98   | 2.97     | 3.614(7)  | 124.6                |
| C(15B)-H(15E)...Se(2)#4 | 0.98   | 3.14     | 3.981(8)  | 144.2                |
| C(15B)-H(15F)...O(2A)#5 | 0.98   | 2.54     | 3.230(10) | 127.4                |

Symmetry transformations used to generate equivalent atoms:

#1  $x, y, z+1$  #2  $-x+2, -y+1, -z+2$  #3  $-x, -y+1, -z+1$

#4  $x-1, y, z$  #5  $-x+1, -y+1, -z+1$

**Table S1.** Optimized geometries, Sum of electronic and thermal Enthalpies (a.u.), and Cartesian coordinates for compound **6a** and its radical.

|                                                                                                                                                                                                    |              |              |              |                                                                                                                                                                                                                |              |              |              |
|----------------------------------------------------------------------------------------------------------------------------------------------------------------------------------------------------|--------------|--------------|--------------|----------------------------------------------------------------------------------------------------------------------------------------------------------------------------------------------------------------|--------------|--------------|--------------|
| 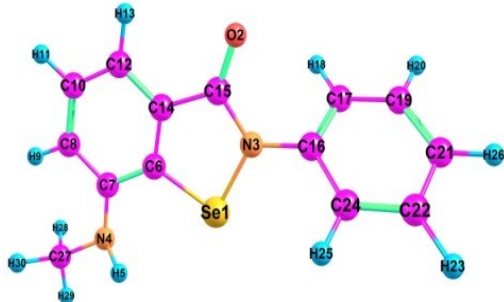 <p style="text-align: center;"><b>6a</b></p> <p>Sum of Electronic and Thermal Enthalpies = -3126.915038 a.u.</p> |              |              |              |  <p style="text-align: center;">Radical of <b>6a</b></p> <p>Sum of Electronic and Thermal Enthalpies = -3126.289315 a.u.</p> |              |              |              |
| 34                                                                                                                                                                                                 | -0.179180000 | -1.202591000 | -0.199051000 | 34                                                                                                                                                                                                             | -0.219961000 | -1.214562000 | -0.123183000 |
| 8                                                                                                                                                                                                  | 1.016964000  | 2.553054000  | 0.274964000  | 8                                                                                                                                                                                                              | 0.978337000  | 2.569128000  | 0.231597000  |
| 7                                                                                                                                                                                                  | 1.009225000  | 0.257715000  | 0.046150000  | 7                                                                                                                                                                                                              | 0.978518000  | 0.264076000  | 0.032234000  |
| 7                                                                                                                                                                                                  | -3.386823000 | -1.517749000 | -0.130772000 | 7                                                                                                                                                                                                              | -3.272987000 | -1.545744000 | -0.153430000 |
| 1                                                                                                                                                                                                  | -2.814357000 | -2.174419000 | 0.384330000  | 6                                                                                                                                                                                                              | -1.578850000 | 0.072801000  | -0.000171000 |
| 6                                                                                                                                                                                                  | -1.572570000 | 0.082930000  | -0.010895000 | 6                                                                                                                                                                                                              | -2.970112000 | -0.252858000 | -0.031136000 |
| 6                                                                                                                                                                                                  | -2.950591000 | -0.196752000 | -0.016755000 | 6                                                                                                                                                                                                              | -3.863197000 | 0.862012000  | 0.072978000  |
| 6                                                                                                                                                                                                  | -3.811110000 | 0.905887000  | 0.056697000  | 1                                                                                                                                                                                                              | -4.932689000 | 0.687881000  | 0.055438000  |
| 1                                                                                                                                                                                                  | -4.883454000 | 0.750931000  | 0.046945000  | 6                                                                                                                                                                                                              | -3.384448000 | 2.158845000  | 0.195704000  |
| 6                                                                                                                                                                                                  | -3.314083000 | 2.212482000  | 0.156911000  | 1                                                                                                                                                                                                              | -4.089253000 | 2.980127000  | 0.272759000  |
| 1                                                                                                                                                                                                  | -4.017463000 | 3.036734000  | 0.211369000  | 6                                                                                                                                                                                                              | -2.009414000 | 2.428946000  | 0.220715000  |
| 6                                                                                                                                                                                                  | -1.950726000 | 2.461108000  | 0.205417000  | 1                                                                                                                                                                                                              | -1.630475000 | 3.440327000  | 0.316583000  |
| 1                                                                                                                                                                                                  | -1.547122000 | 3.462366000  | 0.300174000  | 6                                                                                                                                                                                                              | -1.102836000 | 1.366184000  | 0.119748000  |
| 6                                                                                                                                                                                                  | -1.075143000 | 1.373926000  | 0.121412000  | 6                                                                                                                                                                                                              | 0.372518000  | 1.514558000  | 0.135324000  |
| 6                                                                                                                                                                                                  | 0.399231000  | 1.508534000  | 0.154733000  | 6                                                                                                                                                                                                              | 2.383385000  | 0.041985000  | 0.019577000  |
| 6                                                                                                                                                                                                  | 2.413430000  | 0.031120000  | 0.036052000  | 6                                                                                                                                                                                                              | 3.227729000  | 0.868404000  | -0.730631000 |
| 6                                                                                                                                                                                                  | 3.264624000  | 0.867642000  | -0.695022000 | 1                                                                                                                                                                                                              | 2.812299000  | 1.698018000  | -1.286026000 |
| 1                                                                                                                                                                                                  | 2.854726000  | 1.707422000  | -1.238955000 | 6                                                                                                                                                                                                              | 4.598563000  | 0.628148000  | -0.738064000 |
| 6                                                                                                                                                                                                  | 4.635026000  | 0.624615000  | -0.695987000 | 1                                                                                                                                                                                                              | 5.246872000  | 1.277623000  | -1.317334000 |
| 1                                                                                                                                                                                                  | 5.288949000  | 1.282178000  | -1.259623000 | 6                                                                                                                                                                                                              | 5.139194000  | -0.437918000 | -0.019985000 |
| 6                                                                                                                                                                                                  | 5.168255000  | -0.454157000 | 0.008545000  | 6                                                                                                                                                                                                              | 4.296166000  | -1.262780000 | 0.721419000  |
| 6                                                                                                                                                                                                  | 4.318145000  | -1.289493000 | 0.730038000  | 1                                                                                                                                                                                                              | 4.703987000  | -2.091514000 | 1.290975000  |
| 1                                                                                                                                                                                                  | 4.720347000  | -2.128361000 | 1.288746000  | 6                                                                                                                                                                                                              | 2.925133000  | -1.020732000 | 0.750223000  |
| 6                                                                                                                                                                                                  | 2.947502000  | -1.044796000 | 0.752839000  | 1                                                                                                                                                                                                              | 2.276035000  | -1.647536000 | 1.352994000  |
| 1                                                                                                                                                                                                  | 2.291285000  | -1.679625000 | 1.339193000  | 1                                                                                                                                                                                                              | 6.208227000  | -0.622232000 | -0.036556000 |
| 1                                                                                                                                                                                                  | 6.237064000  | -0.640285000 | -0.003159000 | 6                                                                                                                                                                                                              | -4.661439000 | -1.941054000 | -0.191736000 |
| 6                                                                                                                                                                                                  | -4.804185000 | -1.837321000 | -0.080531000 | 1                                                                                                                                                                                                              | -5.195361000 | -1.491391000 | -1.040623000 |
| 1                                                                                                                                                                                                  | -5.322594000 | -1.379704000 | -0.926032000 | 1                                                                                                                                                                                                              | -4.722219000 | -3.024942000 | -0.290601000 |
| 1                                                                                                                                                                                                  | -4.919372000 | -2.917897000 | -0.169918000 | 1                                                                                                                                                                                                              | -5.198517000 | -1.651860000 | 0.722429000  |
| 1                                                                                                                                                                                                  | -5.295257000 | -1.509768000 | 0.846575000  |                                                                                                                                                                                                                |              |              |              |

**Table S2.** Optimized geometries, Sum of electronic and thermal Enthalpies (a.u.), and Cartesian coordinates for compound **6b** and its radical.

|                                                                                                                                                                                                    |              |              |              |                                                                                                                                                                                                                |              |              |              |
|----------------------------------------------------------------------------------------------------------------------------------------------------------------------------------------------------|--------------|--------------|--------------|----------------------------------------------------------------------------------------------------------------------------------------------------------------------------------------------------------------|--------------|--------------|--------------|
| 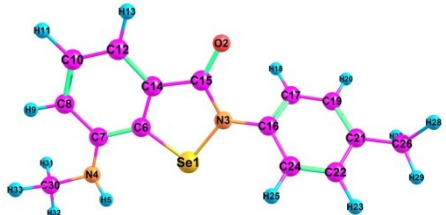 <p style="text-align: center;"><b>6b</b></p> <p>Sum of Electronic and Thermal Enthalpies = -3166.211232 a.u.</p> |              |              |              |  <p style="text-align: center;">Radical of <b>6b</b></p> <p>Sum of Electronic and Thermal Enthalpies = -3165.585511 a.u.</p> |              |              |              |
| 34                                                                                                                                                                                                 | -0.492165000 | -1.182178000 | -0.200384000 | 34                                                                                                                                                                                                             | -0.533430000 | -1.196487000 | -0.120520000 |
| 8                                                                                                                                                                                                  | 0.600008000  | 2.603699000  | 0.278369000  | 8                                                                                                                                                                                                              | 0.561542000  | 2.617034000  | 0.236828000  |
| 7                                                                                                                                                                                                  | 0.653991000  | 0.309856000  | 0.052005000  | 7                                                                                                                                                                                                              | 0.622556000  | 0.313702000  | 0.041133000  |
| 7                                                                                                                                                                                                  | -3.691274000 | -1.586237000 | -0.134315000 | 7                                                                                                                                                                                                              | -3.579280000 | -1.610485000 | -0.158267000 |
| 1                                                                                                                                                                                                  | -3.099576000 | -2.227686000 | 0.378239000  | 6                                                                                                                                                                                                              | -1.928202000 | 0.052309000  | -0.000170000 |
| 6                                                                                                                                                                                                  | -1.921472000 | 0.063510000  | -0.012249000 | 6                                                                                                                                                                                                              | -3.310406000 | -0.310366000 | -0.034264000 |
| 6                                                                                                                                                                                                  | -3.291372000 | -0.253839000 | -0.018299000 | 6                                                                                                                                                                                                              | -4.233290000 | 0.780340000  | 0.068451000  |
| 6                                                                                                                                                                                                  | -4.182152000 | 0.824346000  | 0.056902000  | 1                                                                                                                                                                                                              | -5.297721000 | 0.577661000  | 0.048793000  |
| 1                                                                                                                                                                                                  | -5.249814000 | 0.639838000  | 0.047212000  | 6                                                                                                                                                                                                              | -3.789840000 | 2.089472000  | 0.192123000  |
| 6                                                                                                                                                                                                  | -3.721348000 | 2.144091000  | 0.158211000  | 1                                                                                                                                                                                                              | -4.516550000 | 2.891601000  | 0.267785000  |
| 1                                                                                                                                                                                                  | -4.447171000 | 2.948618000  | 0.213561000  | 6                                                                                                                                                                                                              | -2.422481000 | 2.396219000  | 0.219843000  |
| 6                                                                                                                                                                                                  | -2.365328000 | 2.430080000  | 0.206846000  | 1                                                                                                                                                                                                              | -2.070839000 | 3.417375000  | 0.316360000  |
| 1                                                                                                                                                                                                  | -1.989426000 | 3.441986000  | 0.302672000  | 6                                                                                                                                                                                                              | -1.487450000 | 1.358365000  | 0.120971000  |
| 6                                                                                                                                                                                                  | -1.459860000 | 1.367708000  | 0.122011000  | 6                                                                                                                                                                                                              | -0.016359000 | 1.546520000  | 0.140579000  |
| 6                                                                                                                                                                                                  | 0.010549000  | 1.542561000  | 0.157921000  | 6                                                                                                                                                                                                              | 2.033833000  | 0.132628000  | 0.028047000  |
| 6                                                                                                                                                                                                  | 2.064617000  | 0.124602000  | 0.040081000  | 6                                                                                                                                                                                                              | 2.850934000  | 0.949638000  | -0.761456000 |
| 6                                                                                                                                                                                                  | 2.889050000  | 0.958878000  | -0.723400000 | 1                                                                                                                                                                                                              | 2.409250000  | 1.742158000  | -1.350663000 |
| 1                                                                                                                                                                                                  | 2.453434000  | 1.767407000  | -1.294855000 | 6                                                                                                                                                                                                              | 4.226004000  | 0.751705000  | -0.767721000 |
| 6                                                                                                                                                                                                  | 4.263760000  | 0.757691000  | -0.724444000 | 1                                                                                                                                                                                                              | 4.845710000  | 1.399518000  | -1.381683000 |
| 1                                                                                                                                                                                                  | 4.889234000  | 1.419357000  | -1.317443000 | 6                                                                                                                                                                                                              | 4.827201000  | -0.263490000 | -0.012584000 |
| 6                                                                                                                                                                                                  | 4.857318000  | -0.277606000 | 0.009022000  | 6                                                                                                                                                                                                              | 3.996229000  | -1.075041000 | 0.762483000  |
| 6                                                                                                                                                                                                  | 4.018848000  | -1.106995000 | 0.756864000  | 1                                                                                                                                                                                                              | 4.428835000  | -1.868844000 | 1.364358000  |
| 1                                                                                                                                                                                                  | 4.445318000  | -1.917417000 | 1.340821000  | 6                                                                                                                                                                                                              | 2.617247000  | -0.877860000 | 0.794070000  |
| 6                                                                                                                                                                                                  | 2.640334000  | -0.906795000 | 0.783927000  | 1                                                                                                                                                                                                              | 1.996001000  | -1.504132000 | 1.426254000  |
| 1                                                                                                                                                                                                  | 2.011934000  | -1.547360000 | 1.394261000  | 6                                                                                                                                                                                                              | 6.323251000  | -0.458461000 | -0.033803000 |
| 6                                                                                                                                                                                                  | 6.353272000  | -0.473950000 | -0.004082000 | 1                                                                                                                                                                                                              | 6.698183000  | -0.574629000 | -1.055246000 |
| 1                                                                                                                                                                                                  | 6.741959000  | -0.528485000 | -1.025378000 | 1                                                                                                                                                                                                              | 6.842915000  | 0.400864000  | 0.402412000  |
| 1                                                                                                                                                                                                  | 6.867756000  | 0.356436000  | 0.490716000  | 1                                                                                                                                                                                                              | 6.620828000  | -1.344240000 | 0.531417000  |
| 1                                                                                                                                                                                                  | 6.642389000  | -1.392717000 | 0.510723000  | 6                                                                                                                                                                                                              | -4.956960000 | -2.041438000 | -0.201020000 |
| 6                                                                                                                                                                                                  | -5.099139000 | -1.944525000 | -0.080966000 | 1                                                                                                                                                                                                              | -5.500535000 | -1.603557000 | -1.049941000 |
| 1                                                                                                                                                                                                  | -5.632099000 | -1.499795000 | -0.924327000 | 1                                                                                                                                                                                                              | -4.989417000 | -3.126305000 | -0.302846000 |
| 1                                                                                                                                                                                                  | -5.185142000 | -3.027715000 | -0.171870000 | 1                                                                                                                                                                                                              | -5.503546000 | -1.768947000 | 0.712682000  |
| 1                                                                                                                                                                                                  | -5.596717000 | -1.631876000 | 0.847860000  |                                                                                                                                                                                                                |              |              |              |

**Table S3.** Optimized geometries, Sum of electronic and thermal Enthalpies (a.u.), and Cartesian coordinates for compound **6c** and its radical.

| 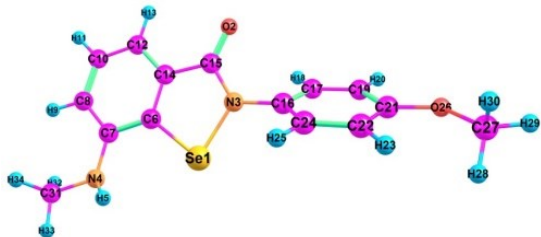 <p style="text-align: center;"><b>6c</b></p> <p>Sum of Electronic and Thermal Enthalpies = -3241.434042 a.u.</p> |              |              |              |  <p style="text-align: center;">Radical of <b>6c</b></p> <p>Sum of Electronic and Thermal Enthalpies = -3240.808290 a.u.</p> |              |              |              |
|----------------------------------------------------------------------------------------------------------------------------------------------------------------------------------------------------|--------------|--------------|--------------|----------------------------------------------------------------------------------------------------------------------------------------------------------------------------------------------------------------|--------------|--------------|--------------|
| 34                                                                                                                                                                                                 | 0.776680000  | -1.158749000 | 0.243101000  | 34                                                                                                                                                                                                             | 0.814316000  | -1.173972000 | 0.167205000  |
| 8                                                                                                                                                                                                  | -0.198042000 | 2.648117000  | -0.305728000 | 8                                                                                                                                                                                                              | -0.152973000 | 2.664912000  | -0.262202000 |
| 7                                                                                                                                                                                                  | -0.319610000 | 0.364795000  | -0.042161000 | 7                                                                                                                                                                                                              | -0.287145000 | 0.372587000  | -0.019973000 |
| 7                                                                                                                                                                                                  | 3.961775000  | -1.673212000 | 0.135382000  | 7                                                                                                                                                                                                              | 3.847723000  | -1.697615000 | 0.153109000  |
| 1                                                                                                                                                                                                  | 3.335539000  | -2.309927000 | -0.340590000 | 6                                                                                                                                                                                                              | 2.251874000  | 0.018408000  | -0.015467000 |
| 6                                                                                                                                                                                                  | 2.245541000  | 0.031238000  | -0.003302000 | 6                                                                                                                                                                                                              | 3.621240000  | -0.392666000 | -0.000224000 |
| 6                                                                                                                                                                                                  | 3.604185000  | -0.332250000 | -0.012887000 | 6                                                                                                                                                                                                              | 4.579768000  | 0.661228000  | -0.150780000 |
| 6                                                                                                                                                                                                  | 4.529419000  | 0.712077000  | -0.135601000 | 6                                                                                                                                                                                                              | 4.579768000  | 0.661228000  | -0.150780000 |
| 1                                                                                                                                                                                                  | 5.590277000  | 0.491421000  | -0.140696000 | 1                                                                                                                                                                                                              | 5.636520000  | 0.420751000  | -0.148151000 |
| 6                                                                                                                                                                                                  | 4.111862000  | 2.043742000  | -0.264562000 | 6                                                                                                                                                                                                              | 4.180907000  | 1.982006000  | -0.299151000 |
| 1                                                                                                                                                                                                  | 4.863399000  | 2.820954000  | -0.355908000 | 1                                                                                                                                                                                                              | 4.934021000  | 2.755081000  | -0.410837000 |
| 6                                                                                                                                                                                                  | 2.765608000  | 2.374821000  | -0.294798000 | 6                                                                                                                                                                                                              | 2.825018000  | 2.337083000  | -0.306186000 |
| 1                                                                                                                                                                                                  | 2.422247000  | 3.396245000  | -0.410260000 | 1                                                                                                                                                                                                              | 2.507671000  | 3.367560000  | -0.421163000 |
| 6                                                                                                                                                                                                  | 1.826247000  | 1.347082000  | -0.164779000 | 6                                                                                                                                                                                                              | 1.855881000  | 1.336780000  | -0.161529000 |
| 6                                                                                                                                                                                                  | 0.361503000  | 1.571737000  | -0.178440000 | 6                                                                                                                                                                                                              | 0.391777000  | 1.578033000  | -0.156336000 |
| 6                                                                                                                                                                                                  | -1.736775000 | 0.244970000  | 0.027360000  | 6                                                                                                                                                                                                              | -1.704960000 | 0.255782000  | 0.042740000  |
| 6                                                                                                                                                                                                  | -2.468351000 | 0.974210000  | 0.973894000  | 6                                                                                                                                                                                                              | -2.438574000 | 0.992536000  | 0.981959000  |
| 1                                                                                                                                                                                                  | -1.951888000 | 1.646638000  | 1.647435000  | 1                                                                                                                                                                                                              | -1.923770000 | 1.669326000  | 1.652289000  |
| 6                                                                                                                                                                                                  | -3.846343000 | 0.854852000  | 1.032820000  | 6                                                                                                                                                                                                              | -3.816668000 | 0.873694000  | 1.039252000  |
| 1                                                                                                                                                                                                  | -4.423889000 | 1.422559000  | 1.753648000  | 1                                                                                                                                                                                                              | -4.395011000 | 1.446409000  | 1.755469000  |
| 6                                                                                                                                                                                                  | -4.522506000 | -0.009683000 | 0.161554000  | 6                                                                                                                                                                                                              | -4.491784000 | 0.002818000  | 0.173565000  |
| 6                                                                                                                                                                                                  | -3.797646000 | -0.746973000 | -0.777949000 | 6                                                                                                                                                                                                              | -3.765129000 | -0.741144000 | -0.758943000 |
| 1                                                                                                                                                                                                  | -4.291621000 | -1.418700000 | -1.468384000 | 1                                                                                                                                                                                                              | -4.257486000 | -1.418319000 | -1.445179000 |
| 6                                                                                                                                                                                                  | -2.410873000 | -0.605991000 | -0.844173000 | 6                                                                                                                                                                                                              | -2.378082000 | -0.600973000 | -0.824017000 |
| 1                                                                                                                                                                                                  | -1.851360000 | -1.161264000 | -1.589761000 | 1                                                                                                                                                                                                              | -1.819280000 | -1.162023000 | -1.565905000 |
| 8                                                                                                                                                                                                  | -5.877092000 | -0.060561000 | 0.308200000  | 8                                                                                                                                                                                                              | -5.846566000 | -0.047031000 | 0.318578000  |
| 6                                                                                                                                                                                                  | -6.625229000 | -0.896165000 | -0.561718000 | 6                                                                                                                                                                                                              | -6.592717000 | -0.892553000 | -0.543572000 |
| 1                                                                                                                                                                                                  | -6.344024000 | -1.948352000 | -0.446562000 | 1                                                                                                                                                                                                              | -6.309695000 | -1.942995000 | -0.417733000 |
| 1                                                                                                                                                                                                  | -7.666907000 | -0.769322000 | -0.272866000 | 1                                                                                                                                                                                                              | -7.634794000 | -0.764614000 | -0.256695000 |
| 1                                                                                                                                                                                                  | -6.500785000 | -0.596966000 | -1.607679000 | 1                                                                                                                                                                                                              | -6.468061000 | -0.603523000 | -1.592364000 |
| 6                                                                                                                                                                                                  | 5.354756000  | -2.081698000 | 0.062055000  | 6                                                                                                                                                                                                              | 5.210440000  | -2.174873000 | 0.181067000  |
| 1                                                                                                                                                                                                  | 5.922255000  | -1.630045000 | 0.878840000  | 1                                                                                                                                                                                                              | 5.788081000  | -1.729283000 | 1.003043000  |
| 1                                                                                                                                                                                                  | 5.406093000  | -3.163943000 | 0.185110000  | 1                                                                                                                                                                                                              | 5.207888000  | -3.256426000 | 0.317767000  |
| 1                                                                                                                                                                                                  | 5.841094000  | -1.815183000 | -0.886930000 | 1                                                                                                                                                                                                              | 5.745477000  | -1.951698000 | -0.752744000 |

**Table S4.** Optimized geometries, Sum of electronic and thermal Enthalpies (a.u.), and Cartesian coordinates for compound **6d** and its radical.

|                                                                                                                                                                                                    |              |              |              |                                                                                                                                                                                                                |              |              |              |
|----------------------------------------------------------------------------------------------------------------------------------------------------------------------------------------------------|--------------|--------------|--------------|----------------------------------------------------------------------------------------------------------------------------------------------------------------------------------------------------------------|--------------|--------------|--------------|
| 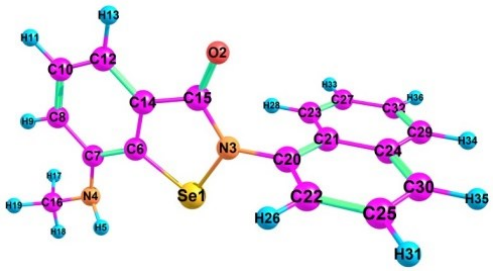 <p style="text-align: center;"><b>6d</b></p> <p>Sum of Electronic and Thermal Enthalpies = -3280.537907 a.u.</p> |              |              |              |  <p style="text-align: center;">Radical of <b>6d</b></p> <p>Sum of Electronic and Thermal Enthalpies = -3279.912089 a.u.</p> |              |              |              |
| 34                                                                                                                                                                                                 | 0.823414000  | -1.261035000 | -0.035045000 | 34                                                                                                                                                                                                             | 0.874330000  | -1.272440000 | -0.088918000 |
| 8                                                                                                                                                                                                  | -0.355777000 | 2.414808000  | -0.963883000 | 8                                                                                                                                                                                                              | -0.322480000 | 2.434542000  | -0.922652000 |
| 7                                                                                                                                                                                                  | -0.330790000 | 0.152246000  | -0.562425000 | 7                                                                                                                                                                                                              | -0.302632000 | 0.161261000  | -0.541345000 |
| 7                                                                                                                                                                                                  | 3.993909000  | -1.465458000 | 0.522827000  | 7                                                                                                                                                                                                              | 3.880805000  | -1.497304000 | 0.526270000  |
| 1                                                                                                                                                                                                  | 3.538242000  | -2.176177000 | -0.034927000 | 6                                                                                                                                                                                                              | 2.206559000  | 0.050135000  | -0.042107000 |
| 6                                                                                                                                                                                                  | 2.199059000  | 0.060621000  | -0.042793000 | 6                                                                                                                                                                                                              | 3.575848000  | -0.226043000 | 0.264770000  |
| 6                                                                                                                                                                                                  | 3.558208000  | -0.171011000 | 0.237028000  | 6                                                                                                                                                                                                              | 4.449114000  | 0.909363000  | 0.250273000  |
| 6                                                                                                                                                                                                  | 4.394257000  | 0.952576000  | 0.246752000  | 1                                                                                                                                                                                                              | 5.500500000  | 0.771719000  | 0.474248000  |
| 1                                                                                                                                                                                                  | 5.449321000  | 0.834187000  | 0.463550000  | 6                                                                                                                                                                                                              | 3.975083000  | 2.179544000  | -0.045347000 |
| 6                                                                                                                                                                                                  | 3.897334000  | 2.233361000  | -0.030681000 | 1                                                                                                                                                                                                              | 4.664996000  | 3.016965000  | -0.047701000 |
| 1                                                                                                                                                                                                  | 4.581298000  | 3.075364000  | -0.010763000 | 6                                                                                                                                                                                                              | 2.623160000  | 2.401632000  | -0.341395000 |
| 6                                                                                                                                                                                                  | 2.561466000  | 2.432949000  | -0.344662000 | 1                                                                                                                                                                                                              | 2.247286000  | 3.391669000  | -0.574705000 |
| 1                                                                                                                                                                                                  | 2.160507000  | 3.412577000  | -0.577382000 | 6                                                                                                                                                                                                              | 1.735887000  | 1.318458000  | -0.336774000 |
| 6                                                                                                                                                                                                  | 1.708577000  | 1.324777000  | -0.350946000 | 6                                                                                                                                                                                                              | 0.284735000  | 1.417305000  | -0.635746000 |
| 6                                                                                                                                                                                                  | 0.260777000  | 1.408758000  | -0.659798000 | 6                                                                                                                                                                                                              | 5.247401000  | -1.840483000 | 0.842925000  |
| 6                                                                                                                                                                                                  | 5.401352000  | -1.740760000 | 0.759025000  | 1                                                                                                                                                                                                              | 5.606902000  | -1.318772000 | 1.740980000  |
| 1                                                                                                                                                                                                  | 5.744019000  | -1.208246000 | 1.649044000  | 1                                                                                                                                                                                                              | 5.313503000  | -2.913001000 | 1.026549000  |
| 1                                                                                                                                                                                                  | 5.518951000  | -2.808080000 | 0.948807000  | 1                                                                                                                                                                                                              | 5.936235000  | -1.592446000 | 0.023214000  |
| 1                                                                                                                                                                                                  | 6.050801000  | -1.463124000 | -0.083150000 | 6                                                                                                                                                                                                              | -1.686199000 | -0.085127000 | -0.795084000 |
| 6                                                                                                                                                                                                  | -1.715370000 | -0.096323000 | -0.805655000 | 6                                                                                                                                                                                                              | -2.637694000 | 0.053997000  | 0.260197000  |
| 6                                                                                                                                                                                                  | -2.661833000 | 0.046574000  | 0.253828000  | 6                                                                                                                                                                                                              | -2.083239000 | -0.465288000 | -2.057020000 |
| 6                                                                                                                                                                                                  | -2.118674000 | -0.479136000 | -2.064810000 | 6                                                                                                                                                                                                              | -2.279736000 | 0.443523000  | 1.576125000  |
| 6                                                                                                                                                                                                  | -2.297602000 | 0.441953000  | 1.566282000  | 6                                                                                                                                                                                                              | -4.014836000 | -0.209845000 | -0.031094000 |
| 6                                                                                                                                                                                                  | -4.040379000 | -0.218093000 | -0.030005000 | 6                                                                                                                                                                                                              | -3.442869000 | -0.722098000 | -2.335644000 |
| 6                                                                                                                                                                                                  | -3.479811000 | -0.734706000 | -2.336650000 | 1                                                                                                                                                                                                              | -1.338163000 | -0.558976000 | -2.839450000 |
| 1                                                                                                                                                                                                  | -1.376718000 | -0.574592000 | -2.849892000 | 6                                                                                                                                                                                                              | -3.234877000 | 0.563175000  | 2.557428000  |
| 6                                                                                                                                                                                                  | -3.248248000 | 0.565103000  | 2.551563000  | 1                                                                                                                                                                                                              | -1.240487000 | 0.651503000  | 1.800423000  |
| 1                                                                                                                                                                                                  | -1.257626000 | 0.652284000  | 1.784738000  | 6                                                                                                                                                                                                              | -4.973724000 | -0.074896000 | 1.007298000  |
| 6                                                                                                                                                                                                  | -4.994379000 | -0.079907000 | 1.012483000  | 6                                                                                                                                                                                                              | -4.385540000 | -0.597788000 | -1.344469000 |
| 6                                                                                                                                                                                                  | -4.417479000 | -0.608516000 | -1.340820000 | 1                                                                                                                                                                                                              | -3.735956000 | -1.015060000 | -3.338211000 |
| 1                                                                                                                                                                                                  | -3.778306000 | -1.028328000 | -3.337458000 | 6                                                                                                                                                                                                              | -4.595130000 | 0.302205000  | 2.272666000  |
| 6                                                                                                                                                                                                  | -4.609710000 | 0.301945000  | 2.274593000  | 1                                                                                                                                                                                                              | -2.944970000 | 0.864268000  | 3.558923000  |
| 1                                                                                                                                                                                                  | -2.953695000 | 0.871358000  | 3.550131000  | 1                                                                                                                                                                                                              | -6.017519000 | -0.273840000 | 0.782710000  |
| 1                                                                                                                                                                                                  | -6.039261000 | -0.279524000 | 0.793514000  | 1                                                                                                                                                                                                              | -5.432324000 | -0.794936000 | -1.556091000 |
| 1                                                                                                                                                                                                  | -5.465448000 | -0.805329000 | -1.547010000 | 1                                                                                                                                                                                                              | -5.338243000 | 0.403231000  | 3.057040000  |
| 1                                                                                                                                                                                                  | -5.349037000 | 0.405848000  | 3.062189000  |                                                                                                                                                                                                                |              |              |              |

**Table S5.** Data for **3** and **6a-6d** obtained by DFT calculations at the B3LYP/6-311+G(d) level in the gas phase. The N-H bond dissociation enthalpies ( $BDE_{N-H}$ ) of **6a-6d** were calculated.

| Calculated $BDE_{N-H}$<br>(kcal/mol) |       | $r_{Se-N}$ [Å] | NPA Charges <sup>a</sup> | <sup>77</sup> Se NMR (ppm) <sup>b</sup> |        |
|--------------------------------------|-------|----------------|--------------------------|-----------------------------------------|--------|
|                                      |       |                | $q_{Se}$                 | Exptl.                                  | Calcd. |
| <b>3</b>                             |       | 1.897          |                          |                                         |        |
| <b>6a</b>                            | 78.89 | 1.898          | +0.596                   | 926                                     | 936    |
| <b>6b</b>                            | 78.88 | 1.898          | +0.595                   | 928                                     | 933    |
| <b>6c</b>                            | 78.90 | 1.898 (1.876)  | +0.588                   | 934                                     | 948    |
| <b>6d</b>                            | 78.95 | 1.899          | +0.591                   | 962                                     | 975    |

<sup>a</sup>The NBO analysis was calculated at the B3LYP/6-311+G(d,p) level using the B3LYP/6-311+G(d)-level-optimized geometries. <sup>b</sup> The <sup>77</sup>Se NMR values are referenced to Me<sub>2</sub>Se ( $\delta = 0$ ). The experimental values are given in parentheses.

**Figure S35.** Relative cell viability of C6 cells in the presence of 10 - 120  $\mu\text{M}$  of antioxidants ebselen (**3**), **5a-5d** and **6a-6d** as determined by MTT measurements after 24 h at 570 nm.

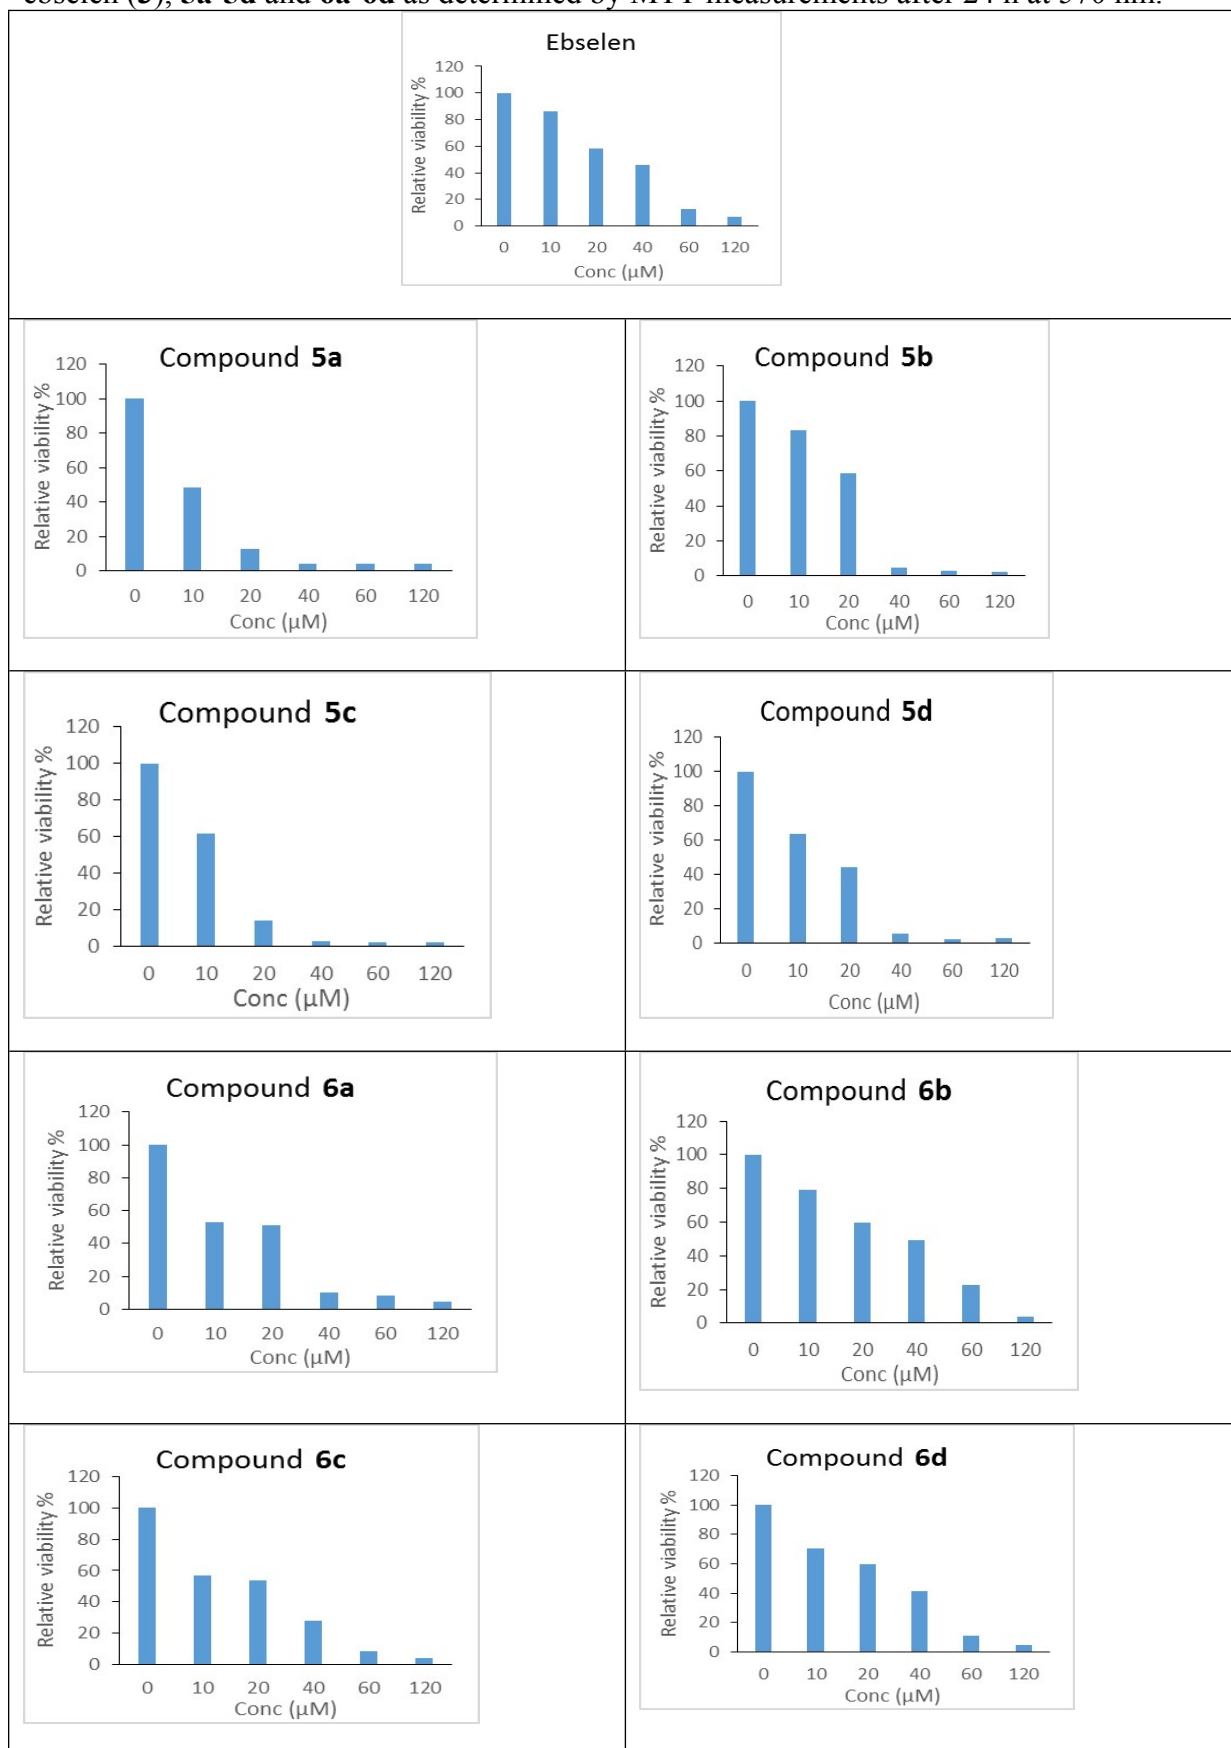

Supplement: d0ob02368j1.pdf [file d0ob02368j1.pdf]
